# Supplementary material for: Genome-Wide Identification, Expression, and Molecular Characterization of the CONSTANS-like Gene Family in Seven Orchid Species
Source: MDPI journal article supplement (doi:10.3390/ijms242316825), 2023-11-27
Supplement: s1 [file s1]

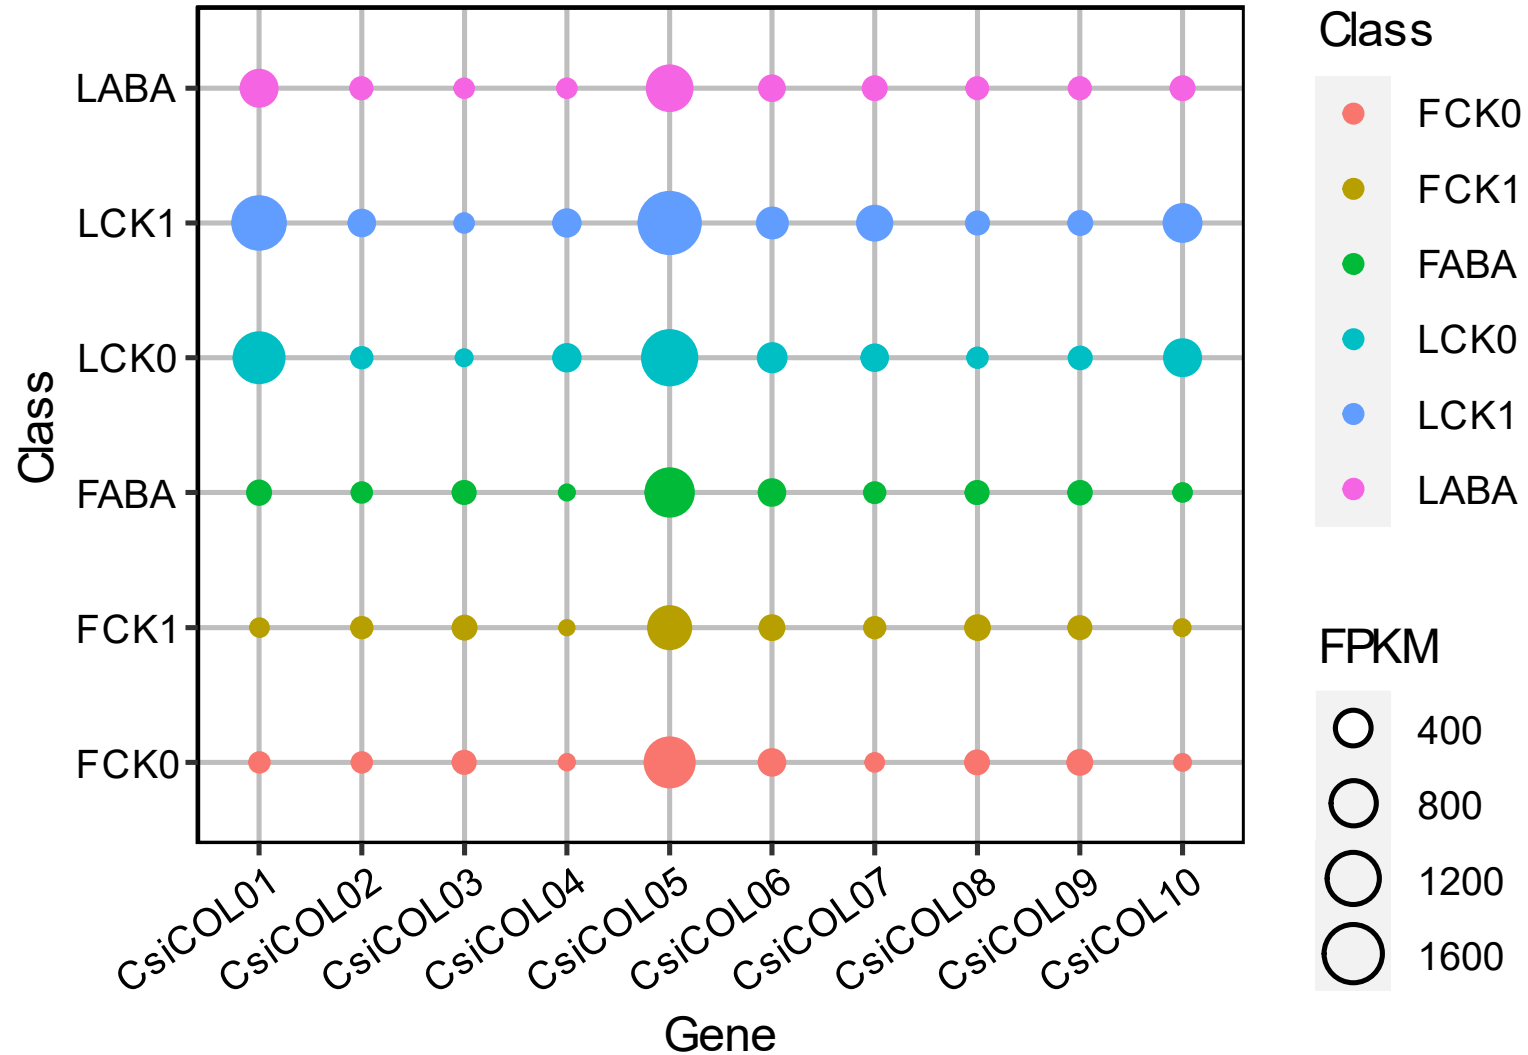

Supplementary Figure S1. Expression levels of *CsiCOLs* in flower and leaf of *C. sinense* before and after ABA treatment. LCK0, Initial leaf control samples; LCK1, Control sample of leaves after one month; LABA, Leaf samples after one month of ABA treatment. FCK0, Initial flower control samples; FCK1, Control sample of leaves after one month; FABA, flower samples after one month of ABA treatment.
