# Supplementary material for: Genome-Wide Identification, Expression, and Molecular Characterization of the CONSTANS-like Gene Family in Seven Orchid Species
Source: Int J Mol Sci. 2023 Nov 27;24(23):16825. doi: 10.3390/ijms242316825 (PMC10706594; doi:10.3390/ijms242316825)
Supplement: Supplementary file 1 [file ijms-24-16825-s001.zip › Supplementary Table.xlsx]

## Sheet: Table S1
Table S1. Complete list of CONSTANS‑Like transcription factors identified in the seven Orchidaceae genome
TF Name	Gene name	chr	subfamily	NO. intron	NO. exon	DNA length	cDNA length	Protein length	Molecular weight	Theoretical pI	Instability index	Aliphatic index	Grand average of hydropathicity	Localization
AshCOL01	Ash001156	fragScaff_scaffold_67	Ⅱ	2	3	1701	492	163	18429	9.18	39.52	70.67	-0.485	nucleus
AshCOL02	Ash001160	fragScaff_scaffold_67	Ⅰ	1	2	2090	921	306	33631.8	5.15	53.38	53.38	-0.405	chloroplast
AshCOL03	Ash001772	fragScaff_scaffold_118	Ⅰ	1	2	1026	813	270	29127.1	8.07	45.13	67	-0.243	nucleus
AshCOL04	Ash005534	fragScaff_scaffold_12	Ⅰ	1	2	1033	957	318	33573.7	6.32	53.2	68.24	-0.206	nucleus
AshCOL05	Ash005669	fragScaff_scaffold_49	Ⅲ	1	2	2645	1242	413	44357.9	5.96	47.58	64.12	-0.459	nucleus
AshCOL06	Ash010227	fragScaff_scaffold_131	Ⅱ	3	4	4407	1230	409	44650.7	5.3	54.25	56.14	-0.479	nucleus
AshCOL07	Ash012457	fragScaff_scaffold_72	Ⅰ	0	1	759	759	252	26866.7	5.07	59.27	52.7	-0.581	nucleus
AshCOL08	Ash013147	fragScaff_scaffold_140	Ⅱ	4	5	7364	1290	429	47402.8	5.54	50.81	61.24	-0.568	nucleus
AshCOL09	Ash015904	fragScaff_scaffold_155	Ⅰ	1	2	1125	1041	346	36307.7	6.22	42.45	69.88	-0.142	nucleus
AshCOL10	Ash015961	fragScaff_scaffold_78	Ⅱ	3	4	3720	1161	386	42045.7	5.36	52.23	70.1	-0.542	nucleus
DcaCOL01	Dca001722	fragScaff_scaffold_133	Ⅱ	3	4	3699	1149	382	41896.6	6.05	29.5	84.08	-0.206	nucleus
DcaCOL02	Dca008867	fragScaff_scaffold_325	Ⅰ	1	2	1084	978	325	34518	6.01	45.36	65.29	-0.228	nucleus
DcaCOL03	Dca011646	fragScaff_scaffold_142	Ⅱ	3	4	14832	1005	334	37188.8	5.55	54.63	72.49	-0.471	nucleus
DcaCOL04	Dca011725	fragScaff_scaffold_1632	Ⅱ	3	4	12829	1287	428	46572.9	5.62	48.36	64.35	-0.424	nucleus
DcaCOL05	Dca013941	fragScaff_scaffold_1148	Ⅲ	1	2	1309	1101	366	40652.7	6.73	58.69	64.54	-0.7	nucleus
DcaCOL06	Dca016138	fragScaff_scaffold_1413	Ⅱ	3	4	12829	1260	419	46136.3	5.85	52.29	60.81	-0.542	nucleus
DcaCOL07	Dca018151	fragScaff_scaffold_822	Ⅱ	3	4	7177	1380	459	50129.8	6.21	50.49	65.32	-0.569	nucleus
DcaCOL08	Dca023181	fragScaff_scaffold_1238	Ⅲ	1	2	3160	1188	395	42385.6	5.76	55.27	64.38	-0.475	nucleus
DcaCOL09	Dca023344	original_scaffold_194949	Ⅰ	3	4	1082	999	332	35517.8	5.69	50.48	62.47	-0.241	nucleus
DhuCOL01	Dhu000003422	chr17	Ⅱ	3	4	7545	1500	499	54675.1	7.46	53.79	67.13	-0.519	chloroplast
DhuCOL02	Dhu000003752	chr17	Ⅰ	1	2	2202	978	325	34477.8	6.01	44.93	63.2	-0.258	nucleus
DhuCOL03	Dhu000010754	chr14	Ⅰ	1	2	1748	1272	423	19419.2	8.36	49.48	62.41	-0.39	mitochondrion
DhuCOL04	Dhu000013676	chr03	Ⅲ	1	2	1878	1098	366	40998.1	7.56	62.85	65.85	-0.716	nucleus
DhuCOL05	Dhu000018351	chr01	Ⅲ	1	2	2738	1188	395	42252.4	5.9	55.09	64.63	-0.462	nucleus
DhuCOL06	Dhu000022425	chr18	Ⅰ	0	1	727	726	241	26712.8	7.57	46.58	52.61	-0.756	nucleus
DhuCOL07	Dhu000023175	chr07	Ⅰ	1	2	954	846	281	31594.4	5.25	62.09	64.23	-0.583	nucleus
DhuCOL08	Dhu000023330	chr07	Ⅱ	4	5	16695	1467	488	53490.1	5.99	44.43	68.83	-0.284	extracellular space
VplCOL01	KAG0448309	JADCNL010000338	Ⅰ	0	1	831	831	276	29858.5	9.17	60.92	61.12	-0.611	chloroplast
VplCOL02	KAG0452546	chr14	Ⅱ	3	4	18797	1188	395	44162.4	9.36	58.2	85.11	-0.529	extracellular space
VplCOL03	KAG0452566	chr14	Ⅱ	4	5	19758	1017	338	38289.5	8.59	57.55	77.37	-0.58	nucleus
VplCOL04	KAG0455078	chr13	Ⅰ	0	1	831	831	276	29974.5	7.01	55.92	59.38	-0.603	chloroplast
VplCOL05	KAG0455182	chr13	Ⅰ	0	1	831	831	276	30014.6	6.61	56.87	59.38	-0.606	chloroplast
VplCOL06	KAG0466942	chr09	Ⅰ	1	2	1068	978	325	35252.7	7.02	36.52	58.89	-0.391	nucleus
VplCOL07	KAG0469883	chr08	Ⅲ	1	2	1477	1377	458	50939.1	8.46	57.19	59.72	-0.769	chloroplast
VplCOL08	KAG0473986	chr07	Ⅰ	1	2	1085	990	329	35005.3	5.22	40.4	71.34	-0.174	nucleus
VplCOL09	KAG0480899	chr05	Ⅱ	3	4	3525	1014	337	36668	5.06	50.42	72.73	-0.426	extracellular space
VplCOL10	KAG0480902	chr05	Ⅱ	3	4	3768	1368	455	49302.9	5.62	44.16	65.47	-0.484	nucleus
VplCOL11	KAG0484756	chr04	Ⅱ	3	4	3512	1242	413	45275.8	5.27	47.09	74.53	-0.379	nucleus
VplCOL12	KAG0488120	chr03	Ⅱ	3	4	2862	984	327	36245.1	6.83	50.93	72.81	-0.473	nucleus
VplCOL13	KAG0491903	chr02	Ⅰ	5	6	111823	1095	364	40803	4.86	65.26	76.35	-0.499	nucleus
VplCOL14	KAG0492743	chr02	Ⅲ	1	2	1380	1191	396	42825.2	8.67	58.32	62.9	-0.57	nucleus
DchCOL01	Maker05679	unchr_scaffold_742	Ⅲ	1	2	1764	1092	363	40499.7	6.73	59.94	62.64	-0.694	nucleus
DchCOL02	Maker54121	chr16	Ⅲ	1	2	1492	1092	363	40551.7	6.73	57.6	61.57	-0.717	nucleus
DchCOL03	Maker55121	chr11	Ⅰ	1	2	1638	999	332	35507.8	5.9	48.65	62.44	-0.244	nucleus
DchCOL04	Maker57377	chr12	Ⅱ	3	4	18148	1236	411	44675.7	5.74	48.49	59.88	-0.453	nucleus
DchCOL05	Maker64124	chr12	Ⅰ	1	2	1119	846	281	31574.4	5.49	61.34	63.2	-0.554	nucleus
DchCOL06	Maker80246	chr07	Ⅲ	1	2	3109	1191	396	42484.7	6.16	54.93	62.75	-0.491	nucleus
DchCOL07	Maker83981	chr09	Ⅰ	1	2	1658	975	324	34378.8	6.01	48.05	63.12	-0.248	nucleus
DchCOL08	Maker84276	chr09	Ⅱ	5	6	12576	1194	397	44000.3	9.11	51.91	76.7	-0.42	nucleus
DchCOL09	Maker84717	chr18	Ⅰ	1	2	21110	1101	366	40532.1	8.22	49.2	70.14	-0.418	chloroplast
DchCOL10	Maker86958	chr19	Ⅱ	4	5	18692	1161	386	42798.6	5.96	54.24	79.87	-0.269	endomembrane system
CsiCOL01	Mol001729	chr09	Ⅰ	1	2	1372	993	330	35138.5	6.98	51.83	66.36	-0.181	nucleus
CsiCOL02	Mol003015	chr09	Ⅱ	3	4	23288	1245	414	45944.1	5.66	50.65	58.26	-0.571	nucleus
CsiCOL03	Mol011887	chr20	Ⅱ	3	4	8027	1287	428	47542.1	7.81	52.91	69.32	-0.564	nucleus
CsiCOL04	Mol013295	chr03	Ⅰ	1	2	1289	831	276	30802.5	5.08	58.38	70	-0.521	nucleus
CsiCOL05	Mol013855	chr06	Ⅰ	1	2	1695	981	326	34391.7	5.93	45.83	68.71	-0.194	nucleus
CsiCOL06	Mol014589	chr06	Ⅱ	3	4	11721	1014	337	37473.1	5.14	54.6	74.39	-0.425	nucleus
CsiCOL07	Mol016638	chr15	Ⅲ	1	2	2108	1155	384	42141.4	5.67	59.42	63.57	-0.557	nucleus
CsiCOL08	Mol018369	contig4269	Ⅱ	3	4	14330	1380	459	49965.5	7.16	52.41	65.32	-0.594	nucleus
CsiCOL09	Mol021474	chr08	Ⅰ	0	1	726	726	241	26227.2	6.4	43.37	54.69	-0.65	nucleus
CsiCOL10	Mol022693	chr07	Ⅲ	1	2	2176	1092	363	41014.4	8.01	63.68	59.42	-0.755	nucleus
PeqCOL01	Peq002631	Scaffold000002	Ⅱ	3	4	10256	1023	340	37818.6	5.78	60.05	72.29	-0.497	nucleus
PeqCOL02	Peq002718	Scaffold000002	Ⅰ	2	3	1813	945	314	33468.9	7.08	44.41	70.03	-0.295	nucleus
PeqCOL03	Peq004392	Scaffold000224	Ⅰ	1	2	1510	1005	334	35551	5.82	51.92	59.25	-0.182	nucleus
PeqCOL04	Peq006250	Scaffold000840	Ⅰ	2	3	19575	717	238	26034.1	6.35	42.71	54.54	-0.648	chloroplast
PeqCOL05	Peq013668	Scaffold000411	Ⅱ	4	5	20561	1290	429	47215.7	6.85	47.21	56.04	-0.556	nucleus
PeqCOL06	Peq019103	Scaffold000219	Ⅱ	3	4	27743	1377	458	50082.3	6.65	46.37	69.02	-0.526	nucleus
PeqCOL07	Peq019271	Scaffold233868	Ⅱ	3	4	17510	1245	414	45564.7	5.53	52.41	57.08	-0.491	nucleus

## Sheet: Table S2
Table S2. Conserved motifs identified in CONSTANS‑Like transcription factors from Orchid by MEME analysis
Motif No.	E-value	LOGO
MOTIF-1	2.0E-2058
MOTIF-2	5.2E-1305
MOTIF-3	1.8E-386
MOTIF-4	5.0E-328
MOTIF-5	1.5e-256
MOTIF-6	3.9e-255
MOTIF-7	1.1e-205
MOTIF-8	4.7e-179
MOTIF-9	2.2e-170
MOTIF-10	3.1e-153

## Sheet: Table S3
Table S3. The COL collinearity gene pairs between C.sinense and other plant species.
Collinearity gene pairs between C.sinense and A.thaliana		Collinearity gene pairs between C.sinense and D.huoshanense		Collinearity gene pairs between C.sinense and D.chrysotoxum		Collinearity gene pairs between C.sinense and V.planifolia		Collinearity gene pairs between C.sinense and O.sativa
COL genes in C.sinense	COL genes in A.thaliana	COL genes in C.sinense	COL genes in D.huoshanense	COL genes in C.sinense	COL genes in D.chrysotoxum	COL genes in C.sinense	COL genes in V.planifolia	COL genes in C.sinense	COL genes in O.sativa
CsiCOL01(Mol001729)	AthCOL03(AT2G24790)	CsiCOL01(Mol001729)	DhuCOL03(Dhu000010754)	CsiCOL01(Mol001729)	DchCOL03(Maker55121)	CsiCOL01(Mol001729)	VplCOL08(KAG0473986)	CsiCOL02(Mol003015)	OsCOL03(LOC_Os02g49230)
		CsiCOL04(Mol013295)	DhuCOL07(Dhu000023175)	CsiCOL03(Mol011887)	DchCOL08(Maker84276)	CsiCOL01(Mol001729)	VplCOL06(KAG0466942)	CsiCOL03(Mol011887)	OsCOL14(LOC_Os08g42440)
		CsiCOL05(Mol013855)	DhuCOL02(Dhu000003752)	CsiCOL04(Mol013295)	DchCOL05(Maker64124)	CsiCOL04(Mol013295)	VplCOL13(KAG0491903)
		CsiCOL07(Mol016638)	DhuCOL05(Dhu000018351)	CsiCOL05(Mol013855)	DchCOL07(Maker83981)	CsiCOL05(Mol013855)	VplCOL06(KAG0466942)
		CsiCOL08(Mol018369)	DhuCOL01(Dhu000003422)	CsiCOL06(Mol014589)	DchCOL10(Maker86958)	CsiCOL06(Mol014589)	VplCOL12(KAG0488120)
		CsiCOL09(Mol021474)	DhuCOL06(Dhu000022425)	CsiCOL07(Mol016638)	DchCOL06(Maker80246)	CsiCOL06(Mol014589)	VplCOL02(KAG0452546)
		CsiCOL10(Mol022693)	DhuCOL04(Dhu000013676)	CsiCOL09(Mol021474)	DchCOL09(Maker84717)	CsiCOL07(Mol016638)	VplCOL14(KAG0492743)
				CsiCOL10(Mol022693)	DchCOL02(Maker54121)	CsiCOL09(Mol021474)	VplCOL04(KAG0455078)

## Sheet: Table S4
Table S4. Ka/Ks analysis and divergence time estimated for Orchidaceae duplicated COL paralogs
No.	Gene I	Location	Gene II	Location	Type of duplication	Ks	Ka	Ka/Ks
1	AshCOL02	fragScaff_scaffold_67	AshCOL03	fragScaff_scaffold_118	-	0.526267	1.3786	0.381741
2	AshCOL02	fragScaff_scaffold_67	AshCOL04	fragScaff_scaffold_12	-	0.395336	1.65505	0.238867
3	AshCOL02	fragScaff_scaffold_67	AshCOL05	fragScaff_scaffold_49	-	0.614373	2.25957	0.271898
4	AshCOL03	fragScaff_scaffold_118	AshCOL05	fragScaff_scaffold_49	-	0.505848	1.317	0.38409
5	AshCOL03	fragScaff_scaffold_118	AshCOL09	fragScaff_scaffold_155	-	0.446832	0.968666	0.461286
6	AshCOL04	fragScaff_scaffold_12	AshCOL07	fragScaff_scaffold_72	-	0.675443	1.53458	0.440148
7	AshCOL05	fragScaff_scaffold_49	AshCOL09	fragScaff_scaffold_155	-	0.590191	1.59102	0.370951
8	AshCOL06	fragScaff_scaffold_131	AshCOL08	fragScaff_scaffold_140	-	0.150553	0.728635	0.206624
9	CsiCOL01	chr09	CsiCOL05	chr06	Dispersed	0.164134	0.924591	0.177521
10	CsiCOL04	chr03	CsiCOL09	chr08	Dispersed	0.686237	2.01282	0.340933
11	CsiCOL04	chr03	CsiCOL10	chr07	Dispersed	0.620416	1.62951	0.380737
12	CsiCOL05	chr06	CsiCOL10	chr07	Dispersed	0.697663	3.00885	0.23187
13	DcaCOL02	fragScaff_scaffold_325	DcaCOL05	fragScaff_scaffold_1148	-	0.606741	1.64792	0.368186
14	DcaCOL02	fragScaff_scaffold_325	DcaCOL09	original_scaffold_194949	-	0.178598	0.922069	0.193692
15	DcaCOL03	fragScaff_scaffold_142	DcaCOL07	fragScaff_scaffold_822	-	0.624172	2.27617	0.27422
16	DcaCOL04	fragScaff_scaffold_1632	DcaCOL06	fragScaff_scaffold_1413	-	0.181038	0.458086	0.395206
17	DchCOL01	unchr_scaffold_742	DchCOL02	chr16	Segmental	0.00852368	0.027091	0.314632
18	DchCOL01	unchr_scaffold_742	DchCOL03	chr11	Segmental	0.741826	1.70197	0.435862
19	DchCOL01	unchr_scaffold_742	DchCOL05	chr12	Segmental	0.622654	1.52621	0.407974
20	DchCOL02	chr16	DchCOL03	chr11	Segmental	0.705845	2.20667	0.319868
21	DchCOL02	chr16	DchCOL05	chr12	Segmental	0.628302	1.55154	0.404955
22	DchCOL03	chr11	DchCOL07	chr09	Segmental	0.191143	0.866464	0.220602
23	DhuCOL02	chr17	DhuCOL03	chr14	Segmental	0.178416	0.864061	0.206485
24	DhuCOL02	chr17	DhuCOL04	chr03	Segmental	0.616721	2.39513	0.25749
25	PeqCOL02	Scaffold000002	PeqCOL03	Scaffold000224	-	0.255411	1.18543	0.215459
26	PeqCOL03	Scaffold000224	PeqCOL04	Scaffold000840	-	0.577143	1.68206	0.343118
27	VplCOL01	JADCNL010000338	VplCOL04	chr13	Segmental	0.0931416	0.138737	0.671353
28	VplCOL01	JADCNL010000338	VplCOL05	chr13	Dispersed	0.0949738	0.145023	0.654888
29	VplCOL01	JADCNL010000338	VplCOL08	chr07	Dispersed	0.75644	2.28023	0.331738
30	VplCOL02	chr14	VplCOL03	chr14	Segmental	0.109652	0.205335	0.534012
31	VplCOL02	chr14	VplCOL10	chr05	Proximal	0.73472	2.09052	0.351453
32	VplCOL03	chr14	VplCOL10	chr05	Proximal	0.711327	2.3694	0.300214
33	VplCOL04	chr13	VplCOL05	chr13	Segmental	0.00483613	0.00487807	0.991402
34	VplCOL04	chr13	VplCOL08	chr07	Dispersed	0.647355	1.92529	0.336238
35	VplCOL04	chr13	VplCOL13	chr02	Dispersed	0.68732	2.00155	0.343394
36	VplCOL05	chr13	VplCOL08	chr07	Dispersed	0.647355	1.8473	0.350433
37	VplCOL05	chr13	VplCOL13	chr02	Dispersed	0.680294	2.02728	0.33557
38	VplCOL06	chr09	VplCOL08	chr07	Dispersed	0.172745	0.940563	0.183661
39	VplCOL09	chr05	VplCOL10	chr05	Proximal	0.0662647	0.094022	0.704779
40	VplCOL10	chr05	VplCOL12	chr03	Segmental	0.629631	3.9709	0.158561

## Sheet: Table S5
Table S5. Cis-elements in the promoter regions of Orchidaceae COL genes.
Gene Name	Motif Name	Motif sequence	Motif location	Motif length	Strand	Species	Description	Classify
AshCOL01	as-1	TGACG	536	5	-	Arabidopsis thaliana	cis-acting element involved in salicylic acid responsiveness	Plant hormone response elements
AshCOL01	as-1	TGACG	1521	5	-	Arabidopsis thaliana	cis-acting element involved in salicylic acid responsiveness	Plant hormone response elements
AshCOL01	as-1	TGACG	1719	5	-	Arabidopsis thaliana	cis-acting element involved in salicylic acid responsiveness	Plant hormone response elements
AshCOL01	TCA-element	TCAGAAGAGG	1871	9	+	Brassica oleracea	cis-acting element involved in salicylic acid responsiveness	Plant hormone response elements
AshCOL01	ERE	ATTTTAAA	1009	8	+	Nicotiana glutinos	estrogen responsive element (ERE)	Plant hormone response elements
AshCOL01	ERE	ATTTTAAA	1419	8	+	Nicotiana glutinos	estrogen responsive element (ERE)	Plant hormone response elements
AshCOL01	Sp1	GGGCGG	1256	6	+	Oryza sativa	Light responsive	Light responsive elements
AshCOL01	Sp1	GGGCGG	1751	6	-	Oryza sativa	Light responsive	Light responsive elements
AshCOL01	GARE-motif	TCTGTTG	598	7	+	Brassica oleracea	gibberellin-responsive element	Plant hormone response elements
AshCOL01	CAAT-box	CAAT	469	4	-	Nicotiana glutinosa	core promoter element	Other elements
AshCOL01	CAAT-box	CAAT	506	4	+	Nicotiana glutinosa	core promoter element	Other elements
AshCOL01	CAAT-box	CAAT	759	4	-	Nicotiana glutinosa	core promoter element	Other elements
AshCOL01	CAAT-box	CAAT	909	4	+	Nicotiana glutinosa	core promoter element	Other elements
AshCOL01	CAAT-box	CAAT	1000	4	-	Nicotiana glutinosa	core promoter element	Other elements
AshCOL01	CAAT-box	CAAT	1111	4	-	Nicotiana glutinosa	core promoter element	Other elements
AshCOL01	CAAT-box	CAAT	1132	4	+	Nicotiana glutinosa	core promoter element	Other elements
AshCOL01	CAAT-box	CAAAT	1367	5	-	Pisum sativum	core promoter element	Other elements
AshCOL01	CAAT-box	CAAT	1438	4	+	Nicotiana glutinosa	core promoter element	Other elements
AshCOL01	CAAT-box	CAAAT	1485	5	-	Pisum sativum	core promoter element	Other elements
AshCOL01	CAAT-box	CAAT	1777	4	-	Nicotiana glutinosa	core promoter element	Other elements
AshCOL01	ABRE	CGCACGTGTC	1680	9	-	Hordeum vulgare	Abscisic acid (ABA) responsive	Plant hormone response elements
AshCOL01	ABRE	CACGTG	1682	6	-	Arabidopsis thaliana	Abscisic acid (ABA) responsive	Plant hormone response elements
AshCOL01	ABRE	ACGTG	1683	5	+	Arabidopsis thaliana	Abscisic acid (ABA) responsive	Plant hormone response elements
AshCOL01	MSA-like	(T/C)C(T/C)AACGG(T/C)(T/C)A	1673	8.5	+	Catharanthus roseus	cis-acting element involved in cell cycle regulation	Cellular development involved elements
AshCOL01	MSA-like	(T/C)C(T/C)AACGG(T/C)(T/C)A	1725	8.5	+	Catharanthus roseus	cis-acting element involved in cell cycle regulation	Cellular development involved elements
AshCOL01	TGACG-motif	TGACG	536	5	-	Hordeum vulgare	cis-acting regulatory element involved in the MeJA-responsiveness	Plant hormone response elements
AshCOL01	TGACG-motif	TGACG	1521	5	-	Hordeum vulgare	cis-acting regulatory element involved in the MeJA-responsiveness	Plant hormone response elements
AshCOL01	TGACG-motif	TGACG	1719	5	-	Hordeum vulgare	cis-acting regulatory element involved in the MeJA-responsiveness	Plant hormone response elements
AshCOL01	Box-4	ATTAAT	1021	6	-	Petroselinum crispum	Light responsive	Light responsive elements
AshCOL01	Box-4	ATTAAT	1614	6	-	Petroselinum crispum	Light responsive	Light responsive elements
AshCOL01	MBS	CAACTG	275	6	-	Arabidopsis thaliana	MYB binding site involved in the drought, low temperature, salt, ABA, and GA stress responses	Biotic and abiotic stress response elements
AshCOL01	MBS	CAACTG	1841	6	+	Arabidopsis thaliana	MYB binding site involved in the drought, low temperature, salt, ABA, and GA stress responses	Biotic and abiotic stress response elements
AshCOL01	DRE core	GCCGAC	317	6	-	Arabidopsis thaliana	Drought-Responsive Element	Biotic and abiotic stress response elements
AshCOL01	DRE core	GCCGAC	1263	6	-	Arabidopsis thaliana	Drought-Responsive Element	Biotic and abiotic stress response elements
AshCOL01	G-Box	CACGTG	1682	6	-	Pisum sativum	Light responsive	Light responsive elements
AshCOL01	NON	CAACGGCCACG	122	10	+	Nicotiana tabacum	Other elements	Other elements
AshCOL01	TATA-box	TACAAAA	48	7	-	Oryza sativa	core promoter element	Other elements
AshCOL01	TATA-box	TATA	689	4	+	Arabidopsis thaliana	core promoter element	Other elements
AshCOL01	TATA-box	ATTATA	1025	6	+	Brassica napus	core promoter element	Other elements
AshCOL01	TATA-box	ATTATA	1059	6	+	Brassica napus	core promoter element	Other elements
AshCOL01	TATA-box	ATTATA	1070	6	+	Brassica napus	core promoter element	Other elements
AshCOL01	TATA-box	TACAAAA	1078	7	-	Oryza sativa	core promoter element	Other elements
AshCOL01	TATA-box	ATTATA	1098	6	+	Brassica napus	core promoter element	Other elements
AshCOL01	TATA-box	TAAAGATT	1389	8	-	Arabidopsis thaliana	core promoter element	Other elements
AshCOL01	TATA-box	TATAA	1405	5	-	Arabidopsis thaliana	core promoter element	Other elements
AshCOL01	TATA-box	ATTATA	1448	6	+	Brassica napus	core promoter element	Other elements
AshCOL01	TATA-box	TATAA	1462	5	-	Arabidopsis thaliana	core promoter element	Other elements
AshCOL01	TATA-box	ATATAT	1478	6	-	Brassica napus	core promoter element	Other elements
AshCOL01	TATA-box	TATTTAAA	1490	8	+	Arabidopsis thaliana	core promoter element	Other elements
AshCOL01	TATA-box	taTATAAAtc	1505	9	-	Arabidopsis thaliana	core promoter element	Other elements
AshCOL01	G-box	CACGAC	312	6	-	Zea mays	Light responsive	Light responsive elements
AshCOL01	G-box	CACGTG	1682	6	-	Arabidopsis thaliana	Light responsive	Light responsive elements
AshCOL01	MYC	CATGTG	206	6	+	Arabidopsis thaliana	MYC binding site involved in the drought, salt, and ABA stress responses	Biotic and abiotic stress response elements
AshCOL01	MYC	CATGTG	264	6	-	Arabidopsis thaliana	MYC binding site involved in the drought, salt, and ABA stress responses	Biotic and abiotic stress response elements
AshCOL01	CGTCA-motif	CGTCA	536	5	+	Hordeum vulgare	cis-acting regulatory element involved in the MeJA-responsiveness	Plant hormone response elements
AshCOL01	CGTCA-motif	CGTCA	1521	5	+	Hordeum vulgare	cis-acting regulatory element involved in the MeJA-responsiveness	Plant hormone response elements
AshCOL01	CGTCA-motif	CGTCA	1719	5	+	Hordeum vulgare	cis-acting regulatory element involved in the MeJA-responsiveness	Plant hormone response elements
AshCOL01	MYB	CAACAG	566	6	+	Nicotiana tabacum	MYB binding site involved in the drought, low temperature, salt, ABA, and GA stress responses	Biotic and abiotic stress response elements
AshCOL01	MYB	CAACAG	599	6	-	Nicotiana tabacum	MYB binding site involved in the drought, low temperature, salt, ABA, and GA stress responses	Biotic and abiotic stress response elements
AshCOL01	CCGTCC-box	CCGTCC	1184	6	-	Petroselinum hortense	related to meristem specific activation	Cellular development involved elements
AshCOL01	TCCC-motif	TCTCCCT	1204	7	-	Spinacia oleracea	Light responsive	Light responsive elements
AshCOL01	CTAG-motif	ACTAGCAGAA	510	9	+	Avena sativa	other elements	Other elements
AshCOL01	ARE	AAACCA	1277	6	+	Zea mays	cis-acting regulatory element essential for the anaerobic induction	Cellular development involved elements
AshCOL01	TCA	TCATCTTCAT	804	9	-	Pisum sativum	cis-acting element involved in salicylic acid responsiveness	Plant hormone response elements
AshCOL01	TCA	TCATCTTCAT	807	9	-	Pisum sativum	cis-acting element involved in salicylic acid responsiveness	Plant hormone response elements
AshCOL01	TCA	TCATCTTCAT	813	10	-	Pisum sativum	cis-acting element involved in salicylic acid responsiveness	Plant hormone response elements
AshCOL01	TCA	TCATCTTCAT	1597	9	-	Pisum sativum	cis-acting element involved in salicylic acid responsiveness	Plant hormone response elements
AshCOL01	LTR	CCGAAA	368	6	-	Hordeum vulgare	cis-acting element involved in low-temperature responsiveness	Biotic and abiotic stress response elements
AshCOL01	GATA-motif	GATAGGG	248	7	-	Pisum sativum	Light responsive	Light responsive elements
AshCOL01	MYB	CAACTG	275	6	-	Arabidopsis thaliana	MYB binding site involved in the drought, low temperature, salt, ABA, and GA stress responses	Biotic and abiotic stress response elements
AshCOL01	MYB	TAACTG	1345	6	-	Arabidopsis thaliana	MYB binding site involved in the drought, low temperature, salt, ABA, and GA stress responses	Biotic and abiotic stress response elements
AshCOL01	MYB	CAACTG	1841	6	+	Arabidopsis thaliana	MYB binding site involved in the drought, low temperature, salt, ABA, and GA stress responses	Biotic and abiotic stress response elements
AshCOL01	DRE1	ACCGAGA	482	7	+	Zea mays	Drought-Responsive Element	Biotic and abiotic stress response elements
AshCOL01	MYB	TAACCA	1819	6	+	Arabidopsis thaliana	MYB binding site involved in the drought, low temperature, salt, ABA, and GA stress responses	Biotic and abiotic stress response elements
AshCOL01	STRE	AGGGG	163	5	-	Arabidopsis thaliana	stress response element (STRE)	Biotic and abiotic stress response elements
AshCOL01	STRE	AGGGG	850	5	+	Arabidopsis thaliana	stress response element (STRE)	Biotic and abiotic stress response elements
AshCOL01	STRE	AGGGG	1761	5	-	Arabidopsis thaliana	stress response element (STRE)	Biotic and abiotic stress response elements
AshCOL01	MYB	CAACCA	110	6	+	Arabidopsis thaliana	MYB binding site involved in the drought, low temperature, salt, ABA, and GA stress responses	Biotic and abiotic stress response elements
AshCOL01	MYB	CAACCA	539	6	+	Arabidopsis thaliana	MYB binding site involved in the drought, low temperature, salt, ABA, and GA stress responses	Biotic and abiotic stress response elements
AshCOL01	MYB	CAACAG	566	6	+	Arabidopsis thaliana	MYB binding site involved in the drought, low temperature, salt, ABA, and GA stress responses	Biotic and abiotic stress response elements
AshCOL01	MYB	CAACAG	599	6	-	Arabidopsis thaliana	MYB binding site involved in the drought, low temperature, salt, ABA, and GA stress responses	Biotic and abiotic stress response elements
AshCOL01	MYB	TAACCA	1819	6	+	Arabidopsis thaliana	MYB binding site involved in the drought, low temperature, salt, ABA, and GA stress responses	Biotic and abiotic stress response elements
AshCOL01	AAGAA-motif	GAAAGAA	629	7	-	Avena sativa	Abscisic acid (ABA) responsive	Plant hormone response elements
AshCOL01	CAT-box	GCCACT	1196	6	-	Arabidopsis thaliana	related to meristem specific activation	Cellular development involved elements
AshCOL01	CAT-box	GCCACT	1585	6	+	Arabidopsis thaliana	related to meristem specific activation	Cellular development involved elements
AshCOL01	circadian	CAAAGATATC	1617	9	-	Lycopersicon esculentum	cis-acting regulatory element involved in circadian control	Cellular development involved elements
AshCOL01	TGA-element	AACGAC	397	6	-	Brassica oleracea	auxin-responsive element	Plant hormone response elements
AshCOL01	A-box	CCGTCC	1184	6	-	Petroselinum crispum	cis-acting regulatory element	Other elements
AshCOL02	ARE	AAACCA	901	6	+	Zea mays	cis-acting regulatory element essential for the anaerobic induction	Cellular development involved elements
AshCOL02	TCA	TCATCTTCAT	428	9	+	Pisum sativum	cis-acting element involved in salicylic acid responsiveness	Plant hormone response elements
AshCOL02	TCCC-motif	TCTCCCT	182	7	+	Spinacia oleracea	Light responsive	Light responsive elements
AshCOL02	TCCC-motif	TCTCCCT	743	7	-	Spinacia oleracea	Light responsive	Light responsive elements
AshCOL02	TATA-box	TATATA	209	6	+	Arabidopsis thaliana	core promoter element	Other elements
AshCOL02	TATA-box	TATATA	1165	6	-	Arabidopsis thaliana	core promoter element	Other elements
AshCOL02	TATA-box	TATATA	1491	6	-	Arabidopsis thaliana	core promoter element	Other elements
AshCOL02	MYC	CATTTG	91	6	-	Arabidopsis thaliana	MYC binding site involved in the drought, salt, and ABA stress responses	Biotic and abiotic stress response elements
AshCOL02	MYC	CAATTG	311	6	+	Arabidopsis thaliana	MYC binding site involved in the drought, salt, and ABA stress responses	Biotic and abiotic stress response elements
AshCOL02	G-box	CACGTG	445	6	+	Arabidopsis thaliana	Light responsive	Light responsive elements
AshCOL02	G-box	TACGTG	1079	6	+	Arabidopsis thaliana	Light responsive	Light responsive elements
AshCOL02	G-box	CACGTC	1422	6	+	Zea mays	Light responsive	Light responsive elements
AshCOL02	G-box	GCCACGTGGA	1894	9	-	Arabidopsis thaliana	Light responsive	Light responsive elements
AshCOL02	G-box	CACGTG	1896	6	-	Arabidopsis thaliana	Light responsive	Light responsive elements
AshCOL02	TATA-box	TATA	79	4	+	Arabidopsis thaliana	core promoter element	Other elements
AshCOL02	TATA-box	ATATAT	208	6	+	Brassica napus	core promoter element	Other elements
AshCOL02	TATA-box	ATATAT	282	6	+	Brassica napus	core promoter element	Other elements
AshCOL02	TATA-box	ATATAA	370	6	+	Brassica oleracea	core promoter element	Other elements
AshCOL02	TATA-box	ATTATA	396	6	+	Brassica napus	core promoter element	Other elements
AshCOL02	TATA-box	TATAAAT	737	7	-	Brassica juncea	core promoter element	Other elements
AshCOL02	TATA-box	ATTATA	797	6	+	Brassica napus	core promoter element	Other elements
AshCOL02	TATA-box	TATAA	997	5	-	Arabidopsis thaliana	core promoter element	Other elements
AshCOL02	TATA-box	TACAAAA	1011	7	+	Oryza sativa	core promoter element	Other elements
AshCOL02	TATA-box	TATAAATA	1028	8	-	Daucus carota	core promoter element	Other elements
AshCOL02	TATA-box	TATAA	1056	5	-	Arabidopsis thaliana	core promoter element	Other elements
AshCOL02	TATA-box	TATA	1077	4	-	Arabidopsis thaliana	core promoter element	Other elements
AshCOL02	TATA-box	TATAA	1106	5	-	Arabidopsis thaliana	core promoter element	Other elements
AshCOL02	TATA-box	TACATAAA	1114	8	-	Oryza sativa	core promoter element	Other elements
AshCOL02	TATA-box	TATAAAA	1125	7	-	Pisum sativum	core promoter element	Other elements
AshCOL02	TATA-box	TATATAA	1164	7	-	Arabidopsis thaliana	core promoter element	Other elements
AshCOL02	TATA-box	TATA	1246	4	-	Arabidopsis thaliana	core promoter element	Other elements
AshCOL02	TATA-box	TATATAA	1490	7	-	Arabidopsis thaliana	core promoter element	Other elements
AshCOL02	TATA-box	ATTATA	1534	6	+	Brassica napus	core promoter element	Other elements
AshCOL02	TATA-box	TACAAAA	1590	7	-	Oryza sativa	core promoter element	Other elements
AshCOL02	TATA-box	TATAAA	1633	6	-	Helianthus annuus	core promoter element	Other elements
AshCOL02	TATA-box	ATATAA	1694	6	+	Brassica oleracea	core promoter element	Other elements
AshCOL02	G-Box	CACGTGAAA	442	9	-	Pisum sativum	Light responsive	Light responsive elements
AshCOL02	G-Box	CACGTG	445	6	+	Pisum sativum	Light responsive	Light responsive elements
AshCOL02	G-Box	CACGTG	1896	6	-	Pisum sativum	Light responsive	Light responsive elements
AshCOL02	AE-box	AGAAACAA	131	8	-	Arabidopsis thaliana	Light responsive	Light responsive elements
AshCOL02	Myc	TCTCTTA	541	7	+	Arabidopsis thaliana	MYC binding site involved in the drought, salt, and ABA stress responses	Biotic and abiotic stress response elements
AshCOL02	TATA-box	TATAAAAT	1124	8	-	Arabidopsis thaliana	core promoter element around -30 of transcription start	Other elements
AshCOL02	Box-4	ATTAAT	392	6	+	Petroselinum crispum	Light responsive	Light responsive elements
AshCOL02	Box-4	ATTAAT	719	6	+	Petroselinum crispum	Light responsive	Light responsive elements
AshCOL02	Box-4	ATTAAT	1207	6	-	Petroselinum crispum	Light responsive	Light responsive elements
AshCOL02	Box III	atCATTTTCACt	754	11	+	Pisum sativum	Light responsive	Light responsive elements
AshCOL02	ABRE	CACGTA	1079	6	-	Zea mays	Abscisic acid (ABA) responsive	Plant hormone response elements
AshCOL02	CAAT-box	CAAT	67	4	+	Nicotiana glutinosa	core promoter element	Other elements
AshCOL02	CAAT-box	CAAAT	91	5	+	Pisum sativum	core promoter element	Other elements
AshCOL02	CAAT-box	CAAT	120	4	+	Nicotiana glutinosa	core promoter element	Other elements
AshCOL02	CAAT-box	CAAT	126	4	+	Nicotiana glutinosa	core promoter element	Other elements
AshCOL02	CAAT-box	CAAT	240	4	+	Nicotiana glutinosa	core promoter element	Other elements
AshCOL02	CAAT-box	CAAT	272	4	+	Nicotiana glutinosa	core promoter element	Other elements
AshCOL02	CAAT-box	CAAAT	286	5	-	Pisum sativum	core promoter element	Other elements
AshCOL02	CAAT-box	CAAAT	295	5	+	Pisum sativum	core promoter element	Other elements
AshCOL02	CAAT-box	CAAT	311	4	+	Nicotiana glutinosa	core promoter element	Other elements
AshCOL02	CAAT-box	CAAT	587	4	+	Nicotiana glutinosa	core promoter element	Other elements
AshCOL02	CAAT-box	CAAT	635	4	-	Nicotiana glutinosa	core promoter element	Other elements
AshCOL02	CAAT-box	CAAAT	778	5	+	Pisum sativum	core promoter element	Other elements
AshCOL02	CAAT-box	CAAT	845	4	+	Nicotiana glutinosa	core promoter element	Other elements
AshCOL02	CAAT-box	CAAT	867	4	-	Nicotiana glutinosa	core promoter element	Other elements
AshCOL02	CAAT-box	CAAAT	923	5	+	Pisum sativum	core promoter element	Other elements
AshCOL02	CAAT-box	CAAT	981	4	+	Nicotiana glutinosa	core promoter element	Other elements
AshCOL02	CAAT-box	CAAAT	991	5	+	Pisum sativum	core promoter element	Other elements
AshCOL02	CAAT-box	CAAAT	1001	5	-	Pisum sativum	core promoter element	Other elements
AshCOL02	CAAT-box	CAAT	1061	4	-	Nicotiana glutinosa	core promoter element	Other elements
AshCOL02	CAAT-box	CAAT	1144	4	-	Nicotiana glutinosa	core promoter element	Other elements
AshCOL02	CAAT-box	CAAT	1179	4	-	Nicotiana glutinosa	core promoter element	Other elements
AshCOL02	CAAT-box	CAAT	1225	4	-	Nicotiana glutinosa	core promoter element	Other elements
AshCOL02	CAAT-box	CAAT	1259	4	+	Nicotiana glutinosa	core promoter element	Other elements
AshCOL02	CAAT-box	CAAT	1311	4	+	Nicotiana glutinosa	core promoter element	Other elements
AshCOL02	CAAT-box	CAAT	1364	4	-	Nicotiana glutinosa	core promoter element	Other elements
AshCOL02	CAAT-box	CAAT	1381	4	+	Nicotiana glutinosa	core promoter element	Other elements
AshCOL02	CAAT-box	CAAT	1449	4	-	Nicotiana glutinosa	core promoter element	Other elements
AshCOL02	CAAT-box	CAAT	1463	4	-	Nicotiana glutinosa	core promoter element	Other elements
AshCOL02	CAAT-box	CAAT	1566	4	-	Nicotiana glutinosa	core promoter element	Other elements
AshCOL02	CAAT-box	CCAAT	1582	5	+	Arabidopsis thaliana	core promoter element	Other elements
AshCOL02	CAAT-box	CAAT	1646	4	-	Nicotiana glutinosa	core promoter element	Other elements
AshCOL02	CAAT-box	CAAT	1662	4	-	Nicotiana glutinosa	core promoter element	Other elements
AshCOL02	CAAT-box	CAAT	1704	4	-	Nicotiana glutinosa	core promoter element	Other elements
AshCOL02	ABRE	CACGTG	445	6	+	Arabidopsis thaliana	Abscisic acid (ABA) responsive	Plant hormone response elements
AshCOL02	ABRE	ACGTG	446	5	+	Arabidopsis thaliana	Abscisic acid (ABA) responsive	Plant hormone response elements
AshCOL02	ABRE	ACGTG	1080	5	+	Arabidopsis thaliana	Abscisic acid (ABA) responsive	Plant hormone response elements
AshCOL02	ABRE	ACGTG	1422	5	-	Arabidopsis thaliana	Abscisic acid (ABA) responsive	Plant hormone response elements
AshCOL02	ABRE	GCCGCGTGGC	1894	9	-	Oryza sativa	Abscisic acid (ABA) responsive	Plant hormone response elements
AshCOL02	ABRE	CACGTG	1896	6	-	Arabidopsis thaliana	Abscisic acid (ABA) responsive	Plant hormone response elements
AshCOL02	ABRE	ACGTG	1897	5	+	Arabidopsis thaliana	Abscisic acid (ABA) responsive	Plant hormone response elements
AshCOL02	ABRE	TACGTG	1079	6	+	Zea mays	Abscisic acid (ABA) responsive	Plant hormone response elements
AshCOL02	ATCT-motif	AATCTAATCC	1725	9	+	Pisum sativum	Light responsive	Light responsive elements
AshCOL02	ERE	ATTTTAAA	935	8	+	Nicotiana glutinos	estrogen responsive element (ERE)	Plant hormone response elements
AshCOL02	ERE	ATTTCATA	1384	8	-	Nicotiana glutinos	estrogen responsive element (ERE)	Plant hormone response elements
AshCOL02	TCT-motif	TCTTAC	543	6	+	Arabidopsis thaliana	Light responsive	Light responsive elements
AshCOL02	TCT-motif	TCTTAC	1295	6	+	Arabidopsis thaliana	Light responsive	Light responsive elements
AshCOL02	dOCT	CTCGGATC	1427	8	+	Zea mays	other elements	Other elements
AshCOL02	ABRE	CCACGTGG	1895	8	-	Zea mays	Abscisic acid (ABA) responsive	Plant hormone response elements
AshCOL02	TGA-element	AACGAC	1466	6	-	Brassica oleracea	auxin-responsive element	Plant hormone response elements
AshCOL02	GCN4-motif	TGAGTCA	382	7	+	Oryza sativa	cis-regulatory element involved in endosperm expression	Cellular development involved elements
AshCOL02	AAGAA-motif	GAAAGAA	1786	7	-	Avena sativa	Abscisic acid (ABA) responsive	Plant hormone response elements
AshCOL02	AAGAA-motif	GAAAGAA	1790	7	-	Avena sativa	Abscisic acid (ABA) responsive	Plant hormone response elements
AshCOL02	AAGAA-motif	GAAAGAA	1969	7	+	Avena sativa	Abscisic acid (ABA) responsive	Plant hormone response elements
AshCOL02	MYB	CAACCA	558	6	-	Arabidopsis thaliana	MYB binding site involved in the drought, low temperature, salt, ABA, and GA stress responses	Biotic and abiotic stress response elements
AshCOL02	MYB	TAACCA	1487	6	-	Arabidopsis thaliana	MYB binding site involved in the drought, low temperature, salt, ABA, and GA stress responses	Biotic and abiotic stress response elements
AshCOL02	STRE	AGGGG	196	5	-	Arabidopsis thaliana	stress response element (STRE)	Biotic and abiotic stress response elements
AshCOL02	STRE	AGGGG	615	5	+	Arabidopsis thaliana	stress response element (STRE)	Biotic and abiotic stress response elements
AshCOL02	STRE	AGGGG	1277	5	+	Arabidopsis thaliana	stress response element (STRE)	Biotic and abiotic stress response elements
AshCOL02	MYB	TAACCA	1487	6	-	Arabidopsis thaliana	MYB binding site involved in the drought, low temperature, salt, ABA, and GA stress responses	Biotic and abiotic stress response elements
AshCOL02	I-box	atGATAAGGTC	227	10	-	Helianthus annuus	Light responsive	Light responsive elements
AshCOL02	I-box	TGATAATGT	228	9	-	Solanum tuberosum	Light responsive	Light responsive elements
AshCOL02	GATA-motif	AAGATAAGATT	530	10	-	Arabidopsis thaliana	Light responsive	Light responsive elements
AshCOL02	GATA-motif	GATAGGG	621	7	+	Pisum sativum	Light responsive	Light responsive elements
AshCOL02	GATA-motif	AAGATAAGATT	993	10	-	Arabidopsis thaliana	Light responsive	Light responsive elements
AshCOL02	P-box	CCTTTTG	1013	7	-	Oryza sativa	gibberellin responsive	Plant hormone response elements
AshCOL02	TATC-box	TATCCCA	1234	7	+	Oryza sativa	gibberellin responsive	Plant hormone response elements
AshCOL02	Box II	CCACGTGGC	1894	9	-	Petroselinum crispum	Light responsive	Light responsive elements
AshCOL02	Box II	CCACGTGGC	1895	9	+	Petroselinum crispum	Light responsive	Light responsive elements
AshCOL03	GT1-motif	GGTTAA	363	6	+	Arabidopsis thaliana	Light responsive	Light responsive elements
AshCOL03	MYB	CAACAG	1093	6	+	Arabidopsis thaliana	MYB binding site involved in the drought, low temperature, salt, ABA, and GA stress responses	Biotic and abiotic stress response elements
AshCOL03	MYB	CAACAG	1494	6	+	Arabidopsis thaliana	MYB binding site involved in the drought, low temperature, salt, ABA, and GA stress responses	Biotic and abiotic stress response elements
AshCOL03	GCN4-motif	TGAGTCA	800	7	+	Oryza sativa	cis-regulatory element involved in endosperm expression	Cellular development involved elements
AshCOL03	GCN4-motif	TGAGTCA	1186	7	+	Oryza sativa	cis-regulatory element involved in endosperm expression	Cellular development involved elements
AshCOL03	LTR	CCGAAA	1251	6	+	Hordeum vulgare	cis-acting element involved in low-temperature responsiveness	Biotic and abiotic stress response elements
AshCOL03	W-box	TTGACC	714	6	-	Arabidopsis thaliana	responsible for inducing plant genes in response to pathogen attack	Biotic and abiotic stress response elements
AshCOL03	W-box	TTGACC	815	6	+	Arabidopsis thaliana	responsible for inducing plant genes in response to pathogen attack	Biotic and abiotic stress response elements
AshCOL03	MYB	CAACTG	1018	6	+	Arabidopsis thaliana	MYB binding site involved in the drought, low temperature, salt, ABA, and GA stress responses	Biotic and abiotic stress response elements
AshCOL03	STRE	AGGGG	679	5	-	Arabidopsis thaliana	stress response element (STRE)	Biotic and abiotic stress response elements
AshCOL03	MBS	CAACTG	1018	6	+	Arabidopsis thaliana	MYB binding site involved in the drought, low temperature, salt, ABA, and GA stress responses	Biotic and abiotic stress response elements
AshCOL03	TATA-box	TATAAAAT	435	8	+	Arabidopsis thaliana	core promoter element around -30 of transcription start	Other elements
AshCOL03	TATA-box	TATAAAAT	1126	8	-	Arabidopsis thaliana	core promoter element around -30 of transcription start	Other elements
AshCOL03	Box-4	ATTAAT	320	6	+	Petroselinum crispum	Light responsive	Light responsive elements
AshCOL03	Box-4	ATTAAT	481	6	+	Petroselinum crispum	Light responsive	Light responsive elements
AshCOL03	Box-4	ATTAAT	583	6	+	Petroselinum crispum	Light responsive	Light responsive elements
AshCOL03	Box-4	ATTAAT	1415	6	-	Petroselinum crispum	Light responsive	Light responsive elements
AshCOL03	Box-4	ATTAAT	1597	6	-	Petroselinum crispum	Light responsive	Light responsive elements
AshCOL03	Box-4	ATTAAT	1628	6	-	Petroselinum crispum	Light responsive	Light responsive elements
AshCOL03	TATA-box	TATATA	272	6	+	Arabidopsis thaliana	core promoter element	Other elements
AshCOL03	TATA-box	TATATA	914	6	+	Arabidopsis thaliana	core promoter element	Other elements
AshCOL03	TATA-box	TATATA	1339	6	-	Arabidopsis thaliana	core promoter element	Other elements
AshCOL03	TATA-box	TATATA	1645	6	-	Arabidopsis thaliana	core promoter element	Other elements
AshCOL03	TATA-box	TATATA	1689	6	-	Arabidopsis thaliana	core promoter element	Other elements
AshCOL03	G-box	TACGTG	1449	6	-	Arabidopsis thaliana	Light responsive	Light responsive elements
AshCOL03	G-box	TACGTG	1823	6	+	Arabidopsis thaliana	Light responsive	Light responsive elements
AshCOL03	MYC	CATTTG	717	6	-	Arabidopsis thaliana	MYC binding site involved in the drought, salt, and ABA stress responses	Biotic and abiotic stress response elements
AshCOL03	MYC	CATTTG	846	6	-	Arabidopsis thaliana	MYC binding site involved in the drought, salt, and ABA stress responses	Biotic and abiotic stress response elements
AshCOL03	TATA-box	taTATAAAtc	58	9	-	Arabidopsis thaliana	core promoter element	Other elements
AshCOL03	TATA-box	TATAA	140	5	-	Arabidopsis thaliana	core promoter element	Other elements
AshCOL03	TATA-box	TATA	250	4	+	Arabidopsis thaliana	core promoter element	Other elements
AshCOL03	TATA-box	ATATAT	271	6	+	Brassica napus	core promoter element	Other elements
AshCOL03	TATA-box	ATATAA	434	6	+	Brassica oleracea	core promoter element	Other elements
AshCOL03	TATA-box	ATATAT	459	6	+	Brassica napus	core promoter element	Other elements
AshCOL03	TATA-box	ATATAT	500	6	+	Brassica napus	core promoter element	Other elements
AshCOL03	TATA-box	TATATA	914	6	+	Arabidopsis thaliana	core promoter element	Other elements
AshCOL03	TATA-box	TACAAAA	976	7	+	Oryza sativa	core promoter element	Other elements
AshCOL03	TATA-box	TATTTAAA	1119	8	+	Arabidopsis thaliana	core promoter element	Other elements
AshCOL03	TATA-box	TATAAAA	1127	7	-	Pisum sativum	core promoter element	Other elements
AshCOL03	TATA-box	TACAAAA	1295	7	+	Oryza sativa	core promoter element	Other elements
AshCOL03	TATA-box	TATAAAT	1320	7	-	Brassica juncea	core promoter element	Other elements
AshCOL03	TATA-box	ATTATA	1337	6	+	Brassica napus	core promoter element	Other elements
AshCOL03	TATA-box	ATATAT	1376	6	-	Brassica napus	core promoter element	Other elements
AshCOL03	TATA-box	TATA	1390	4	-	Arabidopsis thaliana	core promoter element	Other elements
AshCOL03	TATA-box	TATAA	1398	5	-	Arabidopsis thaliana	core promoter element	Other elements
AshCOL03	TATA-box	TATAAATA	1456	8	-	Daucus carota	core promoter element	Other elements
AshCOL03	TATA-box	ATATAA	1466	6	+	Brassica oleracea	core promoter element	Other elements
AshCOL03	TATA-box	ATATAT	1488	6	-	Brassica napus	core promoter element	Other elements
AshCOL03	TATA-box	TACAAAA	1512	7	-	Oryza sativa	core promoter element	Other elements
AshCOL03	TATA-box	ATTATA	1604	6	+	Brassica napus	core promoter element	Other elements
AshCOL03	TATA-box	ATATAA	1617	6	+	Brassica oleracea	core promoter element	Other elements
AshCOL03	TATA-box	ATATAT	1644	6	-	Brassica napus	core promoter element	Other elements
AshCOL03	TATA-box	ATATAT	1688	6	-	Brassica napus	core promoter element	Other elements
AshCOL03	TATA-box	ATATAA	1788	6	+	Brassica oleracea	core promoter element	Other elements
AshCOL03	TATA-box	TACATAAA	1810	8	-	Oryza sativa	core promoter element	Other elements
AshCOL03	TATA-box	TACAAAA	1847	7	-	Oryza sativa	core promoter element	Other elements
AshCOL03	TATA-box	ATTATA	1991	6	+	Brassica napus	core promoter element	Other elements
AshCOL03	AT-rich element	ATAGAAATCAA	1028	10	-	Glycine max	binding site of AT-rich DNA binding protein (ATBP-1)	Other elements
AshCOL03	AE-box	AGAAACAA	1286	8	+	Arabidopsis thaliana	Light responsive	Light responsive elements
AshCOL03	MYB	CAACAG	1093	6	+	Nicotiana tabacum	MYB binding site involved in the drought, low temperature, salt, ABA, and GA stress responses	Biotic and abiotic stress response elements
AshCOL03	MYB	CAACAG	1494	6	+	Nicotiana tabacum	MYB binding site involved in the drought, low temperature, salt, ABA, and GA stress responses	Biotic and abiotic stress response elements
AshCOL03	AT1-motif	AATTATTTTTTATT	1557	13	+	Solanum tuberosum	Light responsive	Light responsive elements
AshCOL03	AT1-motif	AATTATTTTTTATT	1671	13	+	Solanum tuberosum	Light responsive	Light responsive elements
AshCOL03	ARE	AAACCA	860	6	+	Zea mays	cis-acting regulatory element essential for the anaerobic induction	Cellular development involved elements
AshCOL03	TCA	TCATCTTCAT	100	9	+	Pisum sativum	cis-acting element involved in salicylic acid responsiveness	Plant hormone response elements
AshCOL03	WUN-motif	AAATTACT	885	8	+	Nicotiana glutinosa	wound-responsive element	Biotic and abiotic stress response elements
AshCOL03	ERE	ATTTTAAA	587	8	+	Nicotiana glutinos	estrogen responsive element (ERE)	Plant hormone response elements
AshCOL03	ERE	ATTTTAAA	1173	8	+	Nicotiana glutinos	estrogen responsive element (ERE)	Plant hormone response elements
AshCOL03	ERE	ATTTCATA	1611	8	-	Nicotiana glutinos	estrogen responsive element (ERE)	Plant hormone response elements
AshCOL03	ERE	ATTTTAAA	1654	8	+	Nicotiana glutinos	estrogen responsive element (ERE)	Plant hormone response elements
AshCOL03	ERE	ATTTTAAA	1656	8	-	Nicotiana glutinos	estrogen responsive element (ERE)	Plant hormone response elements
AshCOL03	ABRE	TACGTG	1449	6	-	Zea mays	Abscisic acid (ABA) responsive	Plant hormone response elements
AshCOL03	ABRE	TACGTG	1823	6	+	Zea mays	Abscisic acid (ABA) responsive	Plant hormone response elements
AshCOL03	ABRE	CACGTA	1449	6	+	Zea mays	Abscisic acid (ABA) responsive	Plant hormone response elements
AshCOL03	ABRE	CACGTA	1823	6	-	Zea mays	Abscisic acid (ABA) responsive	Plant hormone response elements
AshCOL03	CAAT-box	CAAAT	31	5	+	Pisum sativum	core promoter element	Other elements
AshCOL03	CAAT-box	CAAT	74	4	-	Nicotiana glutinosa	core promoter element	Other elements
AshCOL03	CAAT-box	CAAAT	87	5	+	Pisum sativum	core promoter element	Other elements
AshCOL03	CAAT-box	CAAT	157	4	+	Nicotiana glutinosa	core promoter element	Other elements
AshCOL03	CAAT-box	CAAAT	228	5	-	Pisum sativum	core promoter element	Other elements
AshCOL03	CAAT-box	CAAT	242	4	+	Nicotiana glutinosa	core promoter element	Other elements
AshCOL03	CAAT-box	CAAT	672	4	-	Nicotiana glutinosa	core promoter element	Other elements
AshCOL03	CAAT-box	CAAAT	717	5	+	Pisum sativum	core promoter element	Other elements
AshCOL03	CAAT-box	CAAT	783	4	-	Nicotiana glutinosa	core promoter element	Other elements
AshCOL03	CAAT-box	CAAAT	846	5	+	Pisum sativum	core promoter element	Other elements
AshCOL03	CAAT-box	CCAAT	853	5	+	Arabidopsis thaliana	core promoter element	Other elements
AshCOL03	CAAT-box	CAAAT	873	5	-	Pisum sativum	core promoter element	Other elements
AshCOL03	CAAT-box	CAAT	954	4	+	Nicotiana glutinosa	core promoter element	Other elements
AshCOL03	CAAT-box	CAAT	1035	4	+	Nicotiana glutinosa	core promoter element	Other elements
AshCOL03	CAAT-box	CAAT	1184	4	-	Nicotiana glutinosa	core promoter element	Other elements
AshCOL03	CAAT-box	CAAAT	1291	5	+	Pisum sativum	core promoter element	Other elements
AshCOL03	CAAT-box	CAAAT	1334	5	+	Pisum sativum	core promoter element	Other elements
AshCOL03	CAAT-box	CAAT	1366	4	-	Nicotiana glutinosa	core promoter element	Other elements
AshCOL03	CAAT-box	CAAT	1445	4	-	Nicotiana glutinosa	core promoter element	Other elements
AshCOL03	CAAT-box	CAAT	1537	4	-	Nicotiana glutinosa	core promoter element	Other elements
AshCOL03	CAAT-box	CAAAT	1780	5	-	Pisum sativum	core promoter element	Other elements
AshCOL03	CAAT-box	CAAAT	1985	5	+	Pisum sativum	core promoter element	Other elements
AshCOL03	CAAT-box	CAAT	1996	4	-	Nicotiana glutinosa	core promoter element	Other elements
AshCOL03	ABRE	ACGTG	1449	5	-	Arabidopsis thaliana	Abscisic acid (ABA) responsive	Plant hormone response elements
AshCOL03	ABRE	ACGTG	1824	5	+	Arabidopsis thaliana	Abscisic acid (ABA) responsive	Plant hormone response elements
AshCOL04	P-box	CCTTTTG	483	7	+	Oryza sativa	gibberellin responsive	Plant hormone response elements
AshCOL04	GATA-motif	AAGATAAGATT	286	10	-	Arabidopsis thaliana	Light responsive	Light responsive elements
AshCOL04	I-box	gGATAAGGTG	394	9	-	Zea mays	Light responsive	Light responsive elements
AshCOL04	MYB	TAACTG	850	6	-	Arabidopsis thaliana	MYB binding site involved in the drought, low temperature, salt, ABA, and GA stress responses	Biotic and abiotic stress response elements
AshCOL04	MYB	TAACCA	579	6	+	Arabidopsis thaliana	MYB binding site involved in the drought, low temperature, salt, ABA, and GA stress responses	Biotic and abiotic stress response elements
AshCOL04	CCGTCC-box	CCGTCC	1806	6	+	Nicotiana tabacum	related to meristem specific activation	Cellular development involved elements
AshCOL04	STRE	AGGGG	778	5	-	Arabidopsis thaliana	stress response element (STRE)	Biotic and abiotic stress response elements
AshCOL04	MYB	TAACCA	579	6	+	Arabidopsis thaliana	MYB binding site involved in the drought, low temperature, salt, ABA, and GA stress responses	Biotic and abiotic stress response elements
AshCOL04	CAT-box	GCCACT	1311	6	-	Arabidopsis thaliana	related to meristem specific activation	Cellular development involved elements
AshCOL04	CAT-box	GCCACT	1856	6	-	Arabidopsis thaliana	related to meristem specific activation	Cellular development involved elements
AshCOL04	AAGAA-motif	gGTAAAGAAA	909	9	-	Avena sativa	Abscisic acid (ABA) responsive	Plant hormone response elements
AshCOL04	AAGAA-motif	GAAAGAA	1144	7	-	Avena sativa	Abscisic acid (ABA) responsive	Plant hormone response elements
AshCOL04	TGA-element	AACGAC	1863	6	-	Brassica oleracea	auxin-responsive element	Plant hormone response elements
AshCOL04	A-box	CCGTCC	1806	6	+	Petroselinum crispum	cis-acting regulatory element	Other elements
AshCOL04	WUN-motif	AAATTTCTT	1460	9	+	Nicotiana glutinosa	wound-responsive element	Biotic and abiotic stress response elements
AshCOL04	WUN-motif	AAATTACT	1583	8	-	Nicotiana glutinosa	wound-responsive element	Biotic and abiotic stress response elements
AshCOL04	as-1	TGACG	533	5	+	Arabidopsis thaliana	cis-acting element involved in salicylic acid responsiveness	Plant hormone response elements
AshCOL04	as-1	TGACG	798	5	-	Arabidopsis thaliana	cis-acting element involved in salicylic acid responsiveness	Plant hormone response elements
AshCOL04	ACE	CTAACGTATT	294	9	+	Petroselinum crispum	Light responsive	Light responsive elements
AshCOL04	ERE	ATTTTAAA	1157	8	-	Nicotiana glutinos	estrogen responsive element (ERE)	Plant hormone response elements
AshCOL04	TCT-motif	TCTTAC	328	6	-	Arabidopsis thaliana	Light responsive	Light responsive elements
AshCOL04	ABRE	TACGTG	1873	6	-	Zea mays	Abscisic acid (ABA) responsive	Plant hormone response elements
AshCOL04	CAAT-box	CAAT	146	4	-	Nicotiana glutinosa	core promoter element	Other elements
AshCOL04	CAAT-box	CAAAT	237	5	-	Pisum sativum	core promoter element	Other elements
AshCOL04	CAAT-box	CAAT	265	4	+	Nicotiana glutinosa	core promoter element	Other elements
AshCOL04	CAAT-box	CAAAT	351	5	-	Pisum sativum	core promoter element	Other elements
AshCOL04	CAAT-box	CAAT	410	4	-	Nicotiana glutinosa	core promoter element	Other elements
AshCOL04	CAAT-box	CAAAT	450	5	-	Pisum sativum	core promoter element	Other elements
AshCOL04	CAAT-box	CCAAT	544	5	-	Arabidopsis thaliana	core promoter element	Other elements
AshCOL04	CAAT-box	CAAT	555	4	+	Nicotiana glutinosa	core promoter element	Other elements
AshCOL04	CAAT-box	CCAAT	671	5	-	Arabidopsis thaliana	core promoter element	Other elements
AshCOL04	CAAT-box	CCAAT	702	5	-	Arabidopsis thaliana	core promoter element	Other elements
AshCOL04	CAAT-box	CAAT	766	4	-	Nicotiana glutinosa	core promoter element	Other elements
AshCOL04	CAAT-box	CAAT	792	4	+	Nicotiana glutinosa	core promoter element	Other elements
AshCOL04	CAAT-box	CAAT	882	4	+	Nicotiana glutinosa	core promoter element	Other elements
AshCOL04	CAAT-box	CAAAT	918	5	+	Pisum sativum	core promoter element	Other elements
AshCOL04	CAAT-box	CAAAT	923	5	+	Pisum sativum	core promoter element	Other elements
AshCOL04	CAAT-box	CAAAT	952	5	+	Pisum sativum	core promoter element	Other elements
AshCOL04	CAAT-box	CAAAT	964	5	-	Pisum sativum	core promoter element	Other elements
AshCOL04	CAAT-box	CAAAT	987	5	-	Pisum sativum	core promoter element	Other elements
AshCOL04	CAAT-box	CAAAT	993	5	+	Pisum sativum	core promoter element	Other elements
AshCOL04	CAAT-box	CAAAT	1006	5	-	Pisum sativum	core promoter element	Other elements
AshCOL04	CAAT-box	CAAT	1019	4	+	Nicotiana glutinosa	core promoter element	Other elements
AshCOL04	CAAT-box	CAAAT	1037	5	+	Pisum sativum	core promoter element	Other elements
AshCOL04	CAAT-box	CAAAT	1221	5	+	Pisum sativum	core promoter element	Other elements
AshCOL04	CAAT-box	CAAT	1266	4	+	Nicotiana glutinosa	core promoter element	Other elements
AshCOL04	CAAT-box	CAAAT	1387	5	+	Pisum sativum	core promoter element	Other elements
AshCOL04	CAAT-box	CAAT	1412	4	-	Nicotiana glutinosa	core promoter element	Other elements
AshCOL04	CAAT-box	CAAAT	1450	5	-	Pisum sativum	core promoter element	Other elements
AshCOL04	CAAT-box	CAAAT	1459	5	+	Pisum sativum	core promoter element	Other elements
AshCOL04	CAAT-box	CAAT	1529	4	+	Nicotiana glutinosa	core promoter element	Other elements
AshCOL04	CAAT-box	CAAT	1546	4	-	Nicotiana glutinosa	core promoter element	Other elements
AshCOL04	CAAT-box	CAAT	1602	4	-	Nicotiana glutinosa	core promoter element	Other elements
AshCOL04	CAAT-box	CAAT	1622	4	+	Nicotiana glutinosa	core promoter element	Other elements
AshCOL04	CAAT-box	CCAAT	1650	5	-	Arabidopsis thaliana	core promoter element	Other elements
AshCOL04	CAAT-box	CAAT	1663	4	-	Nicotiana glutinosa	core promoter element	Other elements
AshCOL04	CAAT-box	CCAAT	1944	5	+	Arabidopsis thaliana	core promoter element	Other elements
AshCOL04	CAAT-box	CAAAT	1987	5	+	Pisum sativum	core promoter element	Other elements
AshCOL04	ABRE	ACGTG	1873	5	-	Arabidopsis thaliana	Abscisic acid (ABA) responsive	Plant hormone response elements
AshCOL04	ABRE	CACGTA	1873	6	+	Zea mays	Abscisic acid (ABA) responsive	Plant hormone response elements
AshCOL04	TGACG-motif	TGACG	533	5	+	Hordeum vulgare	cis-acting regulatory element involved in the MeJA-responsiveness	Plant hormone response elements
AshCOL04	TGACG-motif	TGACG	798	5	-	Hordeum vulgare	cis-acting regulatory element involved in the MeJA-responsiveness	Plant hormone response elements
AshCOL04	Box-4	ATTAAT	45	6	+	Petroselinum crispum	Light responsive	Light responsive elements
AshCOL04	Box-4	ATTAAT	347	6	+	Petroselinum crispum	Light responsive	Light responsive elements
AshCOL04	Box-4	ATTAAT	1408	6	-	Petroselinum crispum	Light responsive	Light responsive elements
AshCOL04	Box-4	ATTAAT	1643	6	-	Petroselinum crispum	Light responsive	Light responsive elements
AshCOL04	Myc	TCTCTTA	1179	7	+	Arabidopsis thaliana	MYC binding site involved in the drought, salt, and ABA stress responses	Biotic and abiotic stress response elements
AshCOL04	TATA-box	ATATAT	21	6	+	Brassica napus	core promoter element	Other elements
AshCOL04	TATA-box	TATAAATA	61	8	-	Daucus carota	core promoter element	Other elements
AshCOL04	TATA-box	TATA	89	4	+	Arabidopsis thaliana	core promoter element	Other elements
AshCOL04	TATA-box	ATATAA	121	6	+	Brassica oleracea	core promoter element	Other elements
AshCOL04	TATA-box	TATATA	185	6	+	Arabidopsis thaliana	core promoter element	Other elements
AshCOL04	TATA-box	ATATAT	657	6	+	Brassica napus	core promoter element	Other elements
AshCOL04	TATA-box	TATAA	686	5	-	Arabidopsis thaliana	core promoter element	Other elements
AshCOL04	TATA-box	TATA	716	4	+	Arabidopsis thaliana	core promoter element	Other elements
AshCOL04	TATA-box	TATAAA	757	6	-	Helianthus annuus	core promoter element	Other elements
AshCOL04	TATA-box	ATTATA	972	6	+	Brassica napus	core promoter element	Other elements
AshCOL04	TATA-box	ATTATA	996	6	+	Brassica napus	core promoter element	Other elements
AshCOL04	TATA-box	ccTATAAAaa	1046	9	+	Arabidopsis thaliana	core promoter element	Other elements
AshCOL04	TATA-box	ATATAT	1163	6	-	Brassica napus	core promoter element	Other elements
AshCOL04	TATA-box	TATACA	1366	6	-	Helianthus annuus	core promoter element	Other elements
AshCOL04	TATA-box	TATATA	1750	6	-	Arabidopsis thaliana	core promoter element	Other elements
AshCOL04	G-box	TACGTG	1873	6	-	Arabidopsis thaliana	Light responsive	Light responsive elements
AshCOL04	MYC	CATTTG	236	6	+	Arabidopsis thaliana	MYC binding site involved in the drought, salt, and ABA stress responses	Biotic and abiotic stress response elements
AshCOL04	MYC	CATTTG	1005	6	+	Arabidopsis thaliana	MYC binding site involved in the drought, salt, and ABA stress responses	Biotic and abiotic stress response elements
AshCOL04	TATA-box	TATATA	22	6	+	Arabidopsis thaliana	core promoter element	Other elements
AshCOL04	TATA-box	TATATA	185	6	+	Arabidopsis thaliana	core promoter element	Other elements
AshCOL04	TATA-box	TATATA	1164	6	-	Arabidopsis thaliana	core promoter element	Other elements
AshCOL04	TATA-box	TATATA	1750	6	-	Arabidopsis thaliana	core promoter element	Other elements
AshCOL04	CGTCA-motif	CGTCA	533	5	-	Hordeum vulgare	cis-acting regulatory element involved in the MeJA-responsiveness	Plant hormone response elements
AshCOL04	CGTCA-motif	CGTCA	798	5	+	Hordeum vulgare	cis-acting regulatory element involved in the MeJA-responsiveness	Plant hormone response elements
AshCOL04	TCCC-motif	TCTCCCT	1784	7	+	Spinacia oleracea	Light responsive	Light responsive elements
AshCOL04	TCA	TCATCTTCAT	1371	9	-	Pisum sativum	cis-acting element involved in salicylic acid responsiveness	Plant hormone response elements
AshCOL04	ARE	AAACCA	1070	6	+	Zea mays	cis-acting regulatory element essential for the anaerobic induction	Cellular development involved elements
AshCOL04	ARE	AAACCA	1774	6	+	Zea mays	cis-acting regulatory element essential for the anaerobic induction	Cellular development involved elements
AshCOL05	TATA-box	TATAAAA	50	7	-	Pisum sativum	core promoter element	Other elements
AshCOL05	TATA-box	ATATAT	223	6	+	Brassica napus	core promoter element	Other elements
AshCOL05	TATA-box	ATATAA	278	6	+	Brassica oleracea	core promoter element	Other elements
AshCOL05	TATA-box	ATTATA	339	6	+	Brassica napus	core promoter element	Other elements
AshCOL05	TATA-box	ATTATA	520	6	+	Brassica napus	core promoter element	Other elements
AshCOL05	TATA-box	ATATAT	531	6	+	Brassica napus	core promoter element	Other elements
AshCOL05	TATA-box	ATATAA	547	6	+	Brassica oleracea	core promoter element	Other elements
AshCOL05	TATA-box	ATTATA	561	6	+	Brassica napus	core promoter element	Other elements
AshCOL05	TATA-box	TATATA	583	6	+	Arabidopsis thaliana	core promoter element	Other elements
AshCOL05	TATA-box	TATAAAA	622	7	-	Pisum sativum	core promoter element	Other elements
AshCOL05	TATA-box	ATATAA	633	6	+	Brassica oleracea	core promoter element	Other elements
AshCOL05	TATA-box	TATA	721	4	+	Arabidopsis thaliana	core promoter element	Other elements
AshCOL05	TATA-box	TATA	748	4	+	Arabidopsis thaliana	core promoter element	Other elements
AshCOL05	TATA-box	TATAAAT	834	7	-	Brassica juncea	core promoter element	Other elements
AshCOL05	TATA-box	ATTATA	862	6	+	Brassica napus	core promoter element	Other elements
AshCOL05	TATA-box	ATTATA	1013	6	+	Brassica napus	core promoter element	Other elements
AshCOL05	TATA-box	ATATAT	1037	6	-	Brassica napus	core promoter element	Other elements
AshCOL05	TATA-box	ATTATA	1210	6	+	Brassica napus	core promoter element	Other elements
AshCOL05	TATA-box	TATAAAA	1285	7	-	Pisum sativum	core promoter element	Other elements
AshCOL05	TATA-box	TATA	1336	4	-	Arabidopsis thaliana	core promoter element	Other elements
AshCOL05	TATA-box	TATA	1383	4	-	Arabidopsis thaliana	core promoter element	Other elements
AshCOL05	TATA-box	ATTATA	1458	6	+	Brassica napus	core promoter element	Other elements
AshCOL05	TATA-box	taTATAAAtc	1575	9	-	Arabidopsis thaliana	core promoter element	Other elements
AshCOL05	TATA-box	TATA	1729	4	-	Arabidopsis thaliana	core promoter element	Other elements
AshCOL05	TATA-box	ATATAA	1960	6	+	Brassica oleracea	core promoter element	Other elements
AshCOL05	AAGAA-motif	GAAAGAA	165	7	+	Avena sativa	Abscisic acid (ABA) responsive	Plant hormone response elements
AshCOL05	AAGAA-motif	GAAAGAA	908	7	-	Avena sativa	Abscisic acid (ABA) responsive	Plant hormone response elements
AshCOL05	AAGAA-motif	GAAAGAA	1048	7	+	Avena sativa	Abscisic acid (ABA) responsive	Plant hormone response elements
AshCOL05	AT-rich element	ATAGAAATCAA	1860	10	+	Glycine max	binding site of AT-rich DNA binding protein (ATBP-1)	Other elements
AshCOL05	TATA-box	TATATA	224	6	+	Arabidopsis thaliana	core promoter element	Other elements
AshCOL05	TATA-box	TATATA	236	6	+	Arabidopsis thaliana	core promoter element	Other elements
AshCOL05	TATA-box	TATATAAA	242	8	-	Arabidopsis thaliana	core promoter element	Other elements
AshCOL05	TATA-box	TATATA	583	6	+	Arabidopsis thaliana	core promoter element	Other elements
AshCOL05	TATA-box	TATATA	1038	6	-	Arabidopsis thaliana	core promoter element	Other elements
AshCOL05	TATA-box	TATATA	1212	6	-	Arabidopsis thaliana	core promoter element	Other elements
AshCOL05	TATA-box	TATATAAA	1577	8	-	Arabidopsis thaliana	core promoter element	Other elements
AshCOL05	MYC	CATTTG	683	6	-	Arabidopsis thaliana	MYC binding site involved in the drought, salt, and ABA stress responses	Biotic and abiotic stress response elements
AshCOL05	GT1-motif	GGTTAAT	662	7	+	Avena sativa	Light responsive	Light responsive elements
AshCOL05	GT1-motif	GGTTAA	1355	6	+	Arabidopsis thaliana	Light responsive	Light responsive elements
AshCOL05	TATA-box	TATAAAAT	49	8	-	Arabidopsis thaliana	core promoter element around -30 of transcription start	Other elements
AshCOL05	TATA-box	TATAAAAT	621	8	-	Arabidopsis thaliana	core promoter element around -30 of transcription start	Other elements
AshCOL05	Box-4	ATTAAT	156	6	+	Petroselinum crispum	Light responsive	Light responsive elements
AshCOL05	Box-4	ATTAAT	335	6	+	Petroselinum crispum	Light responsive	Light responsive elements
AshCOL05	Box-4	ATTAAT	513	6	+	Petroselinum crispum	Light responsive	Light responsive elements
AshCOL05	Box-4	ATTAAT	1426	6	-	Petroselinum crispum	Light responsive	Light responsive elements
AshCOL05	Box-4	ATTAAT	1465	6	-	Petroselinum crispum	Light responsive	Light responsive elements
AshCOL05	Box-4	ATTAAT	1479	6	-	Petroselinum crispum	Light responsive	Light responsive elements
AshCOL05	Box-4	ATTAAT	1520	6	-	Petroselinum crispum	Light responsive	Light responsive elements
AshCOL05	Box-4	ATTAAT	1567	6	-	Petroselinum crispum	Light responsive	Light responsive elements
AshCOL05	Box-4	ATTAAT	1584	6	-	Petroselinum crispum	Light responsive	Light responsive elements
AshCOL05	Box-4	ATTAAT	1616	6	-	Petroselinum crispum	Light responsive	Light responsive elements
AshCOL05	AT1-motif	AATTATTTTTTATT	1500	13	+	Solanum tuberosum	Light responsive	Light responsive elements
AshCOL05	ERE	ATTTTAAA	355	8	-	Nicotiana glutinos	estrogen responsive element (ERE)	Plant hormone response elements
AshCOL05	ERE	ATTTTAAA	667	8	+	Nicotiana glutinos	estrogen responsive element (ERE)	Plant hormone response elements
AshCOL05	ERE	ATTTTAAA	925	8	+	Nicotiana glutinos	estrogen responsive element (ERE)	Plant hormone response elements
AshCOL05	ERE	ATTTTAAA	927	8	-	Nicotiana glutinos	estrogen responsive element (ERE)	Plant hormone response elements
AshCOL05	ERE	ATTTTAAA	1163	8	+	Nicotiana glutinos	estrogen responsive element (ERE)	Plant hormone response elements
AshCOL05	ERE	ATTTTAAA	1202	8	+	Nicotiana glutinos	estrogen responsive element (ERE)	Plant hormone response elements
AshCOL05	ERE	ATTTTAAA	1204	8	-	Nicotiana glutinos	estrogen responsive element (ERE)	Plant hormone response elements
AshCOL05	ERE	ATTTTAAA	1473	8	-	Nicotiana glutinos	estrogen responsive element (ERE)	Plant hormone response elements
AshCOL05	ERE	ATTTTAAA	1542	8	-	Nicotiana glutinos	estrogen responsive element (ERE)	Plant hormone response elements
AshCOL05	TCT-motif	TCTTAC	19	6	-	Arabidopsis thaliana	Light responsive	Light responsive elements
AshCOL05	LTR	CCGAAA	1981	6	-	Hordeum vulgare	cis-acting element involved in low-temperature responsiveness	Biotic and abiotic stress response elements
AshCOL05	CAAT-box	CAAT	30	4	-	Nicotiana glutinosa	core promoter element	Other elements
AshCOL05	CAAT-box	CAAT	142	4	-	Nicotiana glutinosa	core promoter element	Other elements
AshCOL05	CAAT-box	CAAT	198	4	+	Nicotiana glutinosa	core promoter element	Other elements
AshCOL05	CAAT-box	CAAT	255	4	-	Nicotiana glutinosa	core promoter element	Other elements
AshCOL05	CAAT-box	CAAT	292	4	+	Nicotiana glutinosa	core promoter element	Other elements
AshCOL05	CAAT-box	CAAT	322	4	-	Nicotiana glutinosa	core promoter element	Other elements
AshCOL05	CAAT-box	CCAAT	379	5	+	Arabidopsis thaliana	core promoter element	Other elements
AshCOL05	CAAT-box	CAAAT	424	5	-	Pisum sativum	core promoter element	Other elements
AshCOL05	CAAT-box	CAAT	500	4	-	Nicotiana glutinosa	core promoter element	Other elements
AshCOL05	CAAT-box	CAAT	525	4	-	Nicotiana glutinosa	core promoter element	Other elements
AshCOL05	CAAT-box	CAAT	679	4	+	Nicotiana glutinosa	core promoter element	Other elements
AshCOL05	CAAT-box	CAAT	697	4	-	Nicotiana glutinosa	core promoter element	Other elements
AshCOL05	CAAT-box	CAAT	703	4	+	Nicotiana glutinosa	core promoter element	Other elements
AshCOL05	CAAT-box	CCAAT	716	5	-	Arabidopsis thaliana	core promoter element	Other elements
AshCOL05	CAAT-box	CAAT	734	4	+	Nicotiana glutinosa	core promoter element	Other elements
AshCOL05	CAAT-box	CAAT	791	4	+	Nicotiana glutinosa	core promoter element	Other elements
AshCOL05	CAAT-box	CAAAT	819	5	+	Pisum sativum	core promoter element	Other elements
AshCOL05	CAAT-box	CAAT	832	4	+	Nicotiana glutinosa	core promoter element	Other elements
AshCOL05	CAAT-box	CAAT	856	4	-	Nicotiana glutinosa	core promoter element	Other elements
AshCOL05	CAAT-box	CAAT	868	4	-	Nicotiana glutinosa	core promoter element	Other elements
AshCOL05	CAAT-box	CAAT	950	4	-	Nicotiana glutinosa	core promoter element	Other elements
AshCOL05	CAAT-box	CAAAT	958	5	+	Pisum sativum	core promoter element	Other elements
AshCOL05	CAAT-box	CCAAT	981	5	+	Arabidopsis thaliana	core promoter element	Other elements
AshCOL05	CAAT-box	CAAT	1035	4	+	Nicotiana glutinosa	core promoter element	Other elements
AshCOL05	CAAT-box	CAAAT	1056	5	-	Pisum sativum	core promoter element	Other elements
AshCOL05	CAAT-box	CAAT	1325	4	-	Nicotiana glutinosa	core promoter element	Other elements
AshCOL05	CAAT-box	CAAAT	1402	5	+	Pisum sativum	core promoter element	Other elements
AshCOL05	CAAT-box	CAAAT	1432	5	+	Pisum sativum	core promoter element	Other elements
AshCOL05	CAAT-box	CAAT	1514	4	+	Nicotiana glutinosa	core promoter element	Other elements
AshCOL05	CAAT-box	CCAAT	1816	5	+	Arabidopsis thaliana	core promoter element	Other elements
AshCOL05	CAAT-box	CCAAT	1857	5	+	Arabidopsis thaliana	core promoter element	Other elements
AshCOL05	CAAT-box	CAAT	1910	4	+	Nicotiana glutinosa	core promoter element	Other elements
AshCOL05	STRE	AGGGG	1352	5	+	Arabidopsis thaliana	stress response element (STRE)	Biotic and abiotic stress response elements
AshCOL05	STRE	AGGGG	1411	5	-	Arabidopsis thaliana	stress response element (STRE)	Biotic and abiotic stress response elements
AshCOL05	STRE	AGGGG	1821	5	-	Arabidopsis thaliana	stress response element (STRE)	Biotic and abiotic stress response elements
AshCOL05	STRE	AGGGG	1847	5	-	Arabidopsis thaliana	stress response element (STRE)	Biotic and abiotic stress response elements
AshCOL05	GATA-motif	AAGATAAGATT	21	10	+	Arabidopsis thaliana	Light responsive	Light responsive elements
AshCOL05	Sp1	GGGCGG	1137	6	-	Oryza sativa	Light responsive	Light responsive elements
AshCOL05	W-box	TTGACC	676	6	-	Arabidopsis thaliana	responsible for inducing plant genes in response to pathogen attack	Biotic and abiotic stress response elements
AshCOL05	W-box	TTGACC	1937	6	-	Arabidopsis thaliana	responsible for inducing plant genes in response to pathogen attack	Biotic and abiotic stress response elements
AshCOL05	AT-rich element	TAAAATACT	267	9	-	Pisum sativum	element for maximal elicitor-mediated activation (2copies)	Other elements
AshCOL06	CARE	CAACTCCC	856	8	-	Oryza sativa	gibberellin responsive	Plant hormone response elements
AshCOL06	STRE	AGGGG	543	5	+	Arabidopsis thaliana	stress response element (STRE)	Biotic and abiotic stress response elements
AshCOL06	STRE	AGGGG	673	5	-	Arabidopsis thaliana	stress response element (STRE)	Biotic and abiotic stress response elements
AshCOL06	STRE	AGGGG	688	5	-	Arabidopsis thaliana	stress response element (STRE)	Biotic and abiotic stress response elements
AshCOL06	STRE	AGGGG	1866	5	-	Arabidopsis thaliana	stress response element (STRE)	Biotic and abiotic stress response elements
AshCOL06	AT-rich element	TAAAATACT	219	9	-	Pisum sativum	element for maximal elicitor-mediated activation (2copies)	Other elements
AshCOL06	MYB	CAACTG	1038	6	-	Arabidopsis thaliana	MYB binding site involved in the drought, low temperature, salt, ABA, and GA stress responses	Biotic and abiotic stress response elements
AshCOL06	MYB	CAACTG	1823	6	-	Arabidopsis thaliana	MYB binding site involved in the drought, low temperature, salt, ABA, and GA stress responses	Biotic and abiotic stress response elements
AshCOL06	I-box	GATAAGGGT	571	9	-	Arabidopsis thaliana	Light responsive	Light responsive elements
AshCOL06	I-box	AGATAAGG	573	8	-	Triticum aestivum	Light responsive	Light responsive elements
AshCOL06	I-box	AAGATAAGGCT	1333	10	+	Gossypium hirsutum	Light responsive	Light responsive elements
AshCOL06	LTR	CCGAAA	594	6	+	Hordeum vulgare	cis-acting element involved in low-temperature responsiveness	Biotic and abiotic stress response elements
AshCOL06	LTR	CCGAAA	1112	6	-	Hordeum vulgare	cis-acting element involved in low-temperature responsiveness	Biotic and abiotic stress response elements
AshCOL06	LAMP-element	CTTTATCA	426	8	+	Pisum sativum	Light responsive	Light responsive elements
AshCOL06	circadian	CAAAGATATC	946	9	-	Lycopersicon esculentum	cis-acting regulatory element involved in circadian control	Cellular development involved elements
AshCOL06	AAGAA-motif	gGTAAAGAAA	1116	10	+	Avena sativa	Abscisic acid (ABA) responsive	Plant hormone response elements
AshCOL06	AAGAA-motif	GAAAGAA	1748	7	-	Avena sativa	Abscisic acid (ABA) responsive	Plant hormone response elements
AshCOL06	GT1-motif	GGTTAA	1442	6	+	Arabidopsis thaliana	Light responsive	Light responsive elements
AshCOL06	TGACG-motif	TGACG	1396	5	-	Hordeum vulgare	cis-acting regulatory element involved in the MeJA-responsiveness	Plant hormone response elements
AshCOL06	ABRE	ACGTG	52	5	+	Arabidopsis thaliana	Abscisic acid (ABA) responsive	Plant hormone response elements
AshCOL06	CAAT-box	CAAAT	60	5	+	Pisum sativum	core promoter element	Other elements
AshCOL06	CAAT-box	CAAT	85	4	-	Nicotiana glutinosa	core promoter element	Other elements
AshCOL06	CAAT-box	CAAT	97	4	-	Nicotiana glutinosa	core promoter element	Other elements
AshCOL06	CAAT-box	CAAAT	155	5	+	Pisum sativum	core promoter element	Other elements
AshCOL06	CAAT-box	CAAAT	180	5	-	Pisum sativum	core promoter element	Other elements
AshCOL06	CAAT-box	CAAAT	188	5	+	Pisum sativum	core promoter element	Other elements
AshCOL06	CAAT-box	CAAT	311	4	-	Nicotiana glutinosa	core promoter element	Other elements
AshCOL06	CAAT-box	CAAT	399	4	-	Nicotiana glutinosa	core promoter element	Other elements
AshCOL06	CAAT-box	CAAAT	432	5	+	Pisum sativum	core promoter element	Other elements
AshCOL06	CAAT-box	CAAAT	488	5	+	Pisum sativum	core promoter element	Other elements
AshCOL06	CAAT-box	CAAT	503	4	-	Nicotiana glutinosa	core promoter element	Other elements
AshCOL06	CAAT-box	CCAAT	627	5	+	Arabidopsis thaliana	core promoter element	Other elements
AshCOL06	CAAT-box	CCAAT	849	5	-	Arabidopsis thaliana	core promoter element	Other elements
AshCOL06	CAAT-box	CAAAT	915	5	-	Pisum sativum	core promoter element	Other elements
AshCOL06	CAAT-box	CAAT	928	4	-	Nicotiana glutinosa	core promoter element	Other elements
AshCOL06	CAAT-box	CAAT	978	4	-	Nicotiana glutinosa	core promoter element	Other elements
AshCOL06	CAAT-box	CAAAT	1011	5	-	Pisum sativum	core promoter element	Other elements
AshCOL06	CAAT-box	CCAAT	1048	5	-	Arabidopsis thaliana	core promoter element	Other elements
AshCOL06	CAAT-box	CAAAT	1059	5	-	Pisum sativum	core promoter element	Other elements
AshCOL06	CAAT-box	CCAAT	1096	5	-	Arabidopsis thaliana	core promoter element	Other elements
AshCOL06	CAAT-box	CAAAT	1189	5	-	Pisum sativum	core promoter element	Other elements
AshCOL06	CAAT-box	CCAAT	1214	5	-	Arabidopsis thaliana	core promoter element	Other elements
AshCOL06	CAAT-box	CAAT	1274	4	-	Nicotiana glutinosa	core promoter element	Other elements
AshCOL06	CAAT-box	CAAT	1296	4	+	Nicotiana glutinosa	core promoter element	Other elements
AshCOL06	CAAT-box	CAAT	1303	4	+	Nicotiana glutinosa	core promoter element	Other elements
AshCOL06	CAAT-box	CCAAT	1321	5	-	Arabidopsis thaliana	core promoter element	Other elements
AshCOL06	CAAT-box	CAAT	1371	4	-	Nicotiana glutinosa	core promoter element	Other elements
AshCOL06	CAAT-box	CAAT	1570	4	-	Nicotiana glutinosa	core promoter element	Other elements
AshCOL06	CAAT-box	CCAAT	1605	5	-	Arabidopsis thaliana	core promoter element	Other elements
AshCOL06	CAAT-box	CAAAT	1620	5	-	Pisum sativum	core promoter element	Other elements
AshCOL06	CAAT-box	CAAT	1674	4	-	Nicotiana glutinosa	core promoter element	Other elements
AshCOL06	CAAT-box	CAAT	1726	4	-	Nicotiana glutinosa	core promoter element	Other elements
AshCOL06	CAAT-box	CAAT	1808	4	+	Nicotiana glutinosa	core promoter element	Other elements
AshCOL06	CAAT-box	CAAAT	1882	5	-	Pisum sativum	core promoter element	Other elements
AshCOL06	CAAT-box	CAAAT	1896	5	+	Pisum sativum	core promoter element	Other elements
AshCOL06	WRE3	CCACCT	710	6	+	Pisum sativum	wound-responsive elements	Biotic and abiotic stress response elements
AshCOL06	ERE	ATTTTAAA	346	8	-	Nicotiana glutinos	estrogen responsive element (ERE)	Plant hormone response elements
AshCOL06	ERE	ATTTTAAA	1505	8	-	Nicotiana glutinos	estrogen responsive element (ERE)	Plant hormone response elements
AshCOL06	TCT-motif	TCTTAC	1331	6	-	Arabidopsis thaliana	Light responsive	Light responsive elements
AshCOL06	as-1	TGACG	1396	5	-	Arabidopsis thaliana	cis-acting element involved in salicylic acid responsiveness	Plant hormone response elements
AshCOL06	ARE	AAACCA	34	6	-	Zea mays	cis-acting regulatory element essential for the anaerobic induction	Cellular development involved elements
AshCOL06	ARE	AAACCA	1465	6	-	Zea mays	cis-acting regulatory element essential for the anaerobic induction	Cellular development involved elements
AshCOL06	CGTCA-motif	CGTCA	1396	5	+	Hordeum vulgare	cis-acting regulatory element involved in the MeJA-responsiveness	Plant hormone response elements
AshCOL06	MYC	CATGTG	1326	6	+	Arabidopsis thaliana	MYC binding site involved in the drought, salt, and ABA stress responses	Biotic and abiotic stress response elements
AshCOL06	MYC	CATTTG	1619	6	+	Arabidopsis thaliana	MYC binding site involved in the drought, salt, and ABA stress responses	Biotic and abiotic stress response elements
AshCOL06	G-Box	CACGTT	51	6	-	Pisum sativum	Light responsive	Light responsive elements
AshCOL06	TATA-box	TATTTAAA	21	8	-	Arabidopsis thaliana	core promoter element	Other elements
AshCOL06	TATA-box	ATATAA	63	6	+	Brassica oleracea	core promoter element	Other elements
AshCOL06	TATA-box	TATAAGAA	112	8	-	Zea mays	core promoter element	Other elements
AshCOL06	TATA-box	TATAAAA	164	7	-	Pisum sativum	core promoter element	Other elements
AshCOL06	TATA-box	ATATAA	266	6	+	Brassica oleracea	core promoter element	Other elements
AshCOL06	TATA-box	ATATAT	352	6	+	Brassica napus	core promoter element	Other elements
AshCOL06	TATA-box	ATTATA	414	6	+	Brassica napus	core promoter element	Other elements
AshCOL06	TATA-box	ATATAA	435	6	+	Brassica oleracea	core promoter element	Other elements
AshCOL06	TATA-box	ATTATA	467	6	+	Brassica napus	core promoter element	Other elements
AshCOL06	TATA-box	TATACA	930	6	-	Helianthus annuus	core promoter element	Other elements
AshCOL06	TATA-box	taTATAAAtc	1052	9	-	Arabidopsis thaliana	core promoter element	Other elements
AshCOL06	TATA-box	TATA	1262	4	-	Arabidopsis thaliana	core promoter element	Other elements
AshCOL06	TATA-box	ATATAT	1387	6	-	Brassica napus	core promoter element	Other elements
AshCOL06	TATA-box	taTATAAAtc	1499	9	-	Arabidopsis thaliana	core promoter element	Other elements
AshCOL06	TATA-box	ATATAT	1905	6	-	Brassica napus	core promoter element	Other elements
AshCOL06	TATA-box	TATAAAAT	932	8	+	Arabidopsis thaliana	core promoter element around -30 of transcription start	Other elements
AshCOL06	MBS	CAACTG	1038	6	-	Arabidopsis thaliana	MYB binding site involved in the drought, low temperature, salt, ABA, and GA stress responses	Biotic and abiotic stress response elements
AshCOL06	MBS	CAACTG	1823	6	-	Arabidopsis thaliana	MYB binding site involved in the drought, low temperature, salt, ABA, and GA stress responses	Biotic and abiotic stress response elements
AshCOL06	Box-4	ATTAAT	172	6	+	Petroselinum crispum	Light responsive	Light responsive elements
AshCOL07	ABRE	TACGTG	1871	6	+	Zea mays	Abscisic acid (ABA) responsive	Plant hormone response elements
AshCOL07	ABRE	ACGTG	1872	5	+	Arabidopsis thaliana	Abscisic acid (ABA) responsive	Plant hormone response elements
AshCOL07	ABRE	CACGTG	1891	6	-	Arabidopsis thaliana	Abscisic acid (ABA) responsive	Plant hormone response elements
AshCOL07	ABRE	ACGTG	1892	5	+	Arabidopsis thaliana	Abscisic acid (ABA) responsive	Plant hormone response elements
AshCOL07	CAAT-box	CAAT	25	4	-	Nicotiana glutinosa	core promoter element	Other elements
AshCOL07	CAAT-box	CAAT	51	4	-	Nicotiana glutinosa	core promoter element	Other elements
AshCOL07	CAAT-box	CCAAT	163	5	-	Arabidopsis thaliana	core promoter element	Other elements
AshCOL07	CAAT-box	CAAAT	213	5	+	Pisum sativum	core promoter element	Other elements
AshCOL07	CAAT-box	CAAAT	229	5	-	Pisum sativum	core promoter element	Other elements
AshCOL07	CAAT-box	CAAAT	368	5	-	Pisum sativum	core promoter element	Other elements
AshCOL07	CAAT-box	CAAT	509	4	+	Nicotiana glutinosa	core promoter element	Other elements
AshCOL07	CAAT-box	CAAT	621	4	+	Nicotiana glutinosa	core promoter element	Other elements
AshCOL07	CAAT-box	CAAAT	698	5	-	Pisum sativum	core promoter element	Other elements
AshCOL07	CAAT-box	CAAAT	903	5	+	Pisum sativum	core promoter element	Other elements
AshCOL07	CAAT-box	CAAAT	950	5	+	Pisum sativum	core promoter element	Other elements
AshCOL07	CAAT-box	CAAT	1059	4	-	Nicotiana glutinosa	core promoter element	Other elements
AshCOL07	CAAT-box	CAAAT	1092	5	+	Pisum sativum	core promoter element	Other elements
AshCOL07	CAAT-box	CAAT	1122	4	-	Nicotiana glutinosa	core promoter element	Other elements
AshCOL07	CAAT-box	CAAAT	1140	5	+	Pisum sativum	core promoter element	Other elements
AshCOL07	CAAT-box	CCAAT	1157	5	+	Arabidopsis thaliana	core promoter element	Other elements
AshCOL07	CAAT-box	CAAT	1209	4	+	Nicotiana glutinosa	core promoter element	Other elements
AshCOL07	CAAT-box	CCAAT	1228	5	-	Arabidopsis thaliana	core promoter element	Other elements
AshCOL07	CAAT-box	CAAAT	1246	5	-	Pisum sativum	core promoter element	Other elements
AshCOL07	CAAT-box	CAAT	1273	4	-	Nicotiana glutinosa	core promoter element	Other elements
AshCOL07	CAAT-box	CAAT	1294	4	+	Nicotiana glutinosa	core promoter element	Other elements
AshCOL07	CAAT-box	CAAT	1344	4	+	Nicotiana glutinosa	core promoter element	Other elements
AshCOL07	CAAT-box	CAAAT	1383	5	+	Pisum sativum	core promoter element	Other elements
AshCOL07	CAAT-box	CAAAT	1389	5	-	Pisum sativum	core promoter element	Other elements
AshCOL07	CAAT-box	CAAAT	1421	5	-	Pisum sativum	core promoter element	Other elements
AshCOL07	CAAT-box	CAAAT	1438	5	+	Pisum sativum	core promoter element	Other elements
AshCOL07	CAAT-box	CAAT	1492	4	-	Nicotiana glutinosa	core promoter element	Other elements
AshCOL07	CAAT-box	CAAAT	1615	5	+	Pisum sativum	core promoter element	Other elements
AshCOL07	CAAT-box	CCAAT	1717	5	-	Arabidopsis thaliana	core promoter element	Other elements
AshCOL07	CAAT-box	CAAAT	1906	5	+	Pisum sativum	core promoter element	Other elements
AshCOL07	CAAT-box	CAAAT	1944	5	+	Pisum sativum	core promoter element	Other elements
AshCOL07	ABRE	CACGTA	1871	6	-	Zea mays	Abscisic acid (ABA) responsive	Plant hormone response elements
AshCOL07	TCA-element	CCATCTTTTT	982	9	+	Nicotiana tabacum	cis-acting element involved in salicylic acid responsiveness	Plant hormone response elements
AshCOL07	TCA-element	CCATCTTTTT	1299	9	+	Nicotiana tabacum	cis-acting element involved in salicylic acid responsiveness	Plant hormone response elements
AshCOL07	TCT-motif	TCTTAC	633	6	-	Arabidopsis thaliana	Light responsive	Light responsive elements
AshCOL07	ARE	AAACCA	701	6	-	Zea mays	cis-acting regulatory element essential for the anaerobic induction	Cellular development involved elements
AshCOL07	GATT-motif	CTCCTGATTAGC	115	11	+	Zea mays	part of a light responsive element	Light responsive elements
AshCOL07	Myc	TCTCTTA	490	7	+	Arabidopsis thaliana	MYC binding site involved in the drought, salt, and ABA stress responses	Biotic and abiotic stress response elements
AshCOL07	Myc	TCTCTTA	727	7	+	Arabidopsis thaliana	MYC binding site involved in the drought, salt, and ABA stress responses	Biotic and abiotic stress response elements
AshCOL07	G-Box	CACGTG	1891	6	-	Pisum sativum	Light responsive	Light responsive elements
AshCOL07	TATA-box	ATATAA	79	6	+	Brassica oleracea	core promoter element	Other elements
AshCOL07	TATA-box	TATAA	159	5	-	Arabidopsis thaliana	core promoter element	Other elements
AshCOL07	TATA-box	TATACA	190	6	-	Helianthus annuus	core promoter element	Other elements
AshCOL07	TATA-box	TATATTTATATTT	359	12	+	Avena sativa	core promoter element	Other elements
AshCOL07	TATA-box	TATA	386	4	+	Arabidopsis thaliana	core promoter element	Other elements
AshCOL07	TATA-box	ATATAT	428	6	+	Brassica napus	core promoter element	Other elements
AshCOL07	TATA-box	TATA	591	4	+	Arabidopsis thaliana	core promoter element	Other elements
AshCOL07	TATA-box	TATAAGAA	672	8	-	Zea mays	core promoter element	Other elements
AshCOL07	TATA-box	TATAA	826	5	-	Arabidopsis thaliana	core promoter element	Other elements
AshCOL07	TATA-box	ATATAT	1346	6	-	Brassica napus	core promoter element	Other elements
AshCOL07	TATA-box	ATTATA	1409	6	+	Brassica napus	core promoter element	Other elements
AshCOL07	TATA-box	ATATAA	1688	6	+	Brassica oleracea	core promoter element	Other elements
AshCOL07	DRE core	GCCGAC	1840	6	-	Arabidopsis thaliana	Drought-Responsive Element	Biotic and abiotic stress response elements
AshCOL07	MYC	CATTTG	228	6	+	Arabidopsis thaliana	MYC binding site involved in the drought, salt, and ABA stress responses	Biotic and abiotic stress response elements
AshCOL07	MYC	CATGTG	376	6	+	Arabidopsis thaliana	MYC binding site involved in the drought, salt, and ABA stress responses	Biotic and abiotic stress response elements
AshCOL07	MYC	CATTTG	1383	6	-	Arabidopsis thaliana	MYC binding site involved in the drought, salt, and ABA stress responses	Biotic and abiotic stress response elements
AshCOL07	G-box	CCACGTAA	1870	8	-	Brassica napus	Light responsive	Light responsive elements
AshCOL07	G-box	TACGTG	1871	6	+	Arabidopsis thaliana	Light responsive	Light responsive elements
AshCOL07	G-box	CACGTG	1891	6	-	Arabidopsis thaliana	Light responsive	Light responsive elements
AshCOL07	O2-site	GATGACATGG	457	9	+	Zea mays	cis-acting regulatory element involved in zein metabolism regulation	Cellular development involved elements
AshCOL07	O2-site	GATGACATGG	461	9	-	Zea mays	cis-acting regulatory element involved in zein metabolism regulation	Cellular development involved elements
AshCOL07	STRE	AGGGG	137	5	+	Arabidopsis thaliana	stress response element (STRE)	Biotic and abiotic stress response elements
AshCOL07	STRE	AGGGG	1168	5	-	Arabidopsis thaliana	stress response element (STRE)	Biotic and abiotic stress response elements
AshCOL07	TATC-box	TATCCCA	978	7	+	Oryza sativa	gibberellin responsive	Plant hormone response elements
AshCOL07	LTR	CCGAAA	682	6	-	Hordeum vulgare	cis-acting element involved in low-temperature responsiveness	Biotic and abiotic stress response elements
AshCOL07	CAT-box	GCCACT	857	6	+	Arabidopsis thaliana	related to meristem specific activation	Cellular development involved elements
AshCOL07	AAGAA-motif	GAAAGAA	503	7	-	Avena sativa	Abscisic acid (ABA) responsive	Plant hormone response elements
AshCOL07	AAGAA-motif	GAAAGAA	921	7	-	Avena sativa	Abscisic acid (ABA) responsive	Plant hormone response elements
AshCOL08	MYB	CAACAG	341	6	-	Nicotiana tabacum	MYB binding site involved in the drought, low temperature, salt, ABA, and GA stress responses	Biotic and abiotic stress response elements
AshCOL08	MRE	AACCTAA	1203	7	+	Petroselinum crispum	MYB binding site involved in light responsiveness	Light responsive elements
AshCOL08	TC-rich repeats	GTTTTCTTAC	1480	9	+	Nicotiana tabacum	cis-acting element involved in defense and stress responsiveness	Biotic and abiotic stress response elements
AshCOL08	TCCC-motif	TCTCCCT	583	7	+	Spinacia oleracea	Light responsive	Light responsive elements
AshCOL08	TCA	TCATCTTCAT	1985	9	+	Pisum sativum	cis-acting element involved in salicylic acid responsiveness	Plant hormone response elements
AshCOL08	ARE	AAACCA	1723	6	-	Zea mays	cis-acting regulatory element essential for the anaerobic induction	Cellular development involved elements
AshCOL08	ARE	AAACCA	1836	6	+	Zea mays	cis-acting regulatory element essential for the anaerobic induction	Cellular development involved elements
AshCOL08	Box-4	ATTAAT	75	6	+	Petroselinum crispum	Light responsive	Light responsive elements
AshCOL08	Box-4	ATTAAT	152	6	+	Petroselinum crispum	Light responsive	Light responsive elements
AshCOL08	Box-4	ATTAAT	425	6	+	Petroselinum crispum	Light responsive	Light responsive elements
AshCOL08	TATA-box	TATAAAAT	1797	8	-	Arabidopsis thaliana	core promoter element around -30 of transcription start	Other elements
AshCOL08	TATA-box	TATAAAAT	1807	8	-	Arabidopsis thaliana	core promoter element around -30 of transcription start	Other elements
AshCOL08	Box III	atCATTTTCACt	1846	11	+	Pisum sativum	Light responsive	Light responsive elements
AshCOL08	MYC	CATTTG	1352	6	+	Arabidopsis thaliana	MYC binding site involved in the drought, salt, and ABA stress responses	Biotic and abiotic stress response elements
AshCOL08	MYC	CATGTG	1703	6	+	Arabidopsis thaliana	MYC binding site involved in the drought, salt, and ABA stress responses	Biotic and abiotic stress response elements
AshCOL08	MYC	CATTTG	1719	6	+	Arabidopsis thaliana	MYC binding site involved in the drought, salt, and ABA stress responses	Biotic and abiotic stress response elements
AshCOL08	TATA-box	TATATAAA	161	8	-	Arabidopsis thaliana	core promoter element	Other elements
AshCOL08	TATA-box	TATATA	181	6	+	Arabidopsis thaliana	core promoter element	Other elements
AshCOL08	TATA-box	TATATA	204	6	+	Arabidopsis thaliana	core promoter element	Other elements
AshCOL08	TATA-box	TATATA	1435	6	-	Arabidopsis thaliana	core promoter element	Other elements
AshCOL08	TATA-box	TATATA	1819	6	-	Arabidopsis thaliana	core promoter element	Other elements
AshCOL08	AE-box	AGAAACAA	1408	8	-	Arabidopsis thaliana	Light responsive	Light responsive elements
AshCOL08	TATA-box	ATTATA	54	6	+	Brassica napus	core promoter element	Other elements
AshCOL08	TATA-box	TATAA	63	5	-	Arabidopsis thaliana	core promoter element	Other elements
AshCOL08	TATA-box	TACAAAA	123	7	-	Oryza sativa	core promoter element	Other elements
AshCOL08	TATA-box	TATAAAA	160	7	-	Pisum sativum	core promoter element	Other elements
AshCOL08	TATA-box	ATATAT	180	6	+	Brassica napus	core promoter element	Other elements
AshCOL08	TATA-box	ATTATA	202	6	+	Brassica napus	core promoter element	Other elements
AshCOL08	TATA-box	ccTATAAAaa	220	9	+	Arabidopsis thaliana	core promoter element	Other elements
AshCOL08	TATA-box	TATA	280	4	+	Arabidopsis thaliana	core promoter element	Other elements
AshCOL08	TATA-box	TATA	286	4	+	Arabidopsis thaliana	core promoter element	Other elements
AshCOL08	TATA-box	taTATAAAtc	1431	9	-	Arabidopsis thaliana	core promoter element	Other elements
AshCOL08	TATA-box	TATAAAA	1798	7	-	Pisum sativum	core promoter element	Other elements
AshCOL08	TATA-box	TATAAAA	1808	7	-	Pisum sativum	core promoter element	Other elements
AshCOL08	TATA-box	ATTATA	1817	6	+	Brassica napus	core promoter element	Other elements
AshCOL08	TATA-box	TATA	1857	4	-	Arabidopsis thaliana	core promoter element	Other elements
AshCOL08	TATA-box	TACAAAA	1913	7	-	Oryza sativa	core promoter element	Other elements
AshCOL08	Sp1	GGGCGG	362	6	+	Oryza sativa	Light responsive	Light responsive elements
AshCOL08	WRE3	CCACCT	1246	6	+	Pisum sativum	wound-responsive elements	Biotic and abiotic stress response elements
AshCOL08	CAAT-box	CAAAT	41	5	-	Pisum sativum	core promoter element	Other elements
AshCOL08	CAAT-box	CAAT	71	4	-	Nicotiana glutinosa	core promoter element	Other elements
AshCOL08	CAAT-box	CAAT	83	4	-	Nicotiana glutinosa	core promoter element	Other elements
AshCOL08	CAAT-box	CCAAT	237	5	-	Arabidopsis thaliana	core promoter element	Other elements
AshCOL08	CAAT-box	CAAT	296	4	+	Nicotiana glutinosa	core promoter element	Other elements
AshCOL08	CAAT-box	CAAAT	435	5	+	Pisum sativum	core promoter element	Other elements
AshCOL08	CAAT-box	CAAT	636	4	-	Nicotiana glutinosa	core promoter element	Other elements
AshCOL08	CAAT-box	CAAAT	666	5	-	Pisum sativum	core promoter element	Other elements
AshCOL08	CAAT-box	CAAT	689	4	+	Nicotiana glutinosa	core promoter element	Other elements
AshCOL08	CAAT-box	CAAT	798	4	+	Nicotiana glutinosa	core promoter element	Other elements
AshCOL08	CAAT-box	CCAAT	857	5	-	Arabidopsis thaliana	core promoter element	Other elements
AshCOL08	CAAT-box	CAAT	893	4	-	Nicotiana glutinosa	core promoter element	Other elements
AshCOL08	CAAT-box	CAAT	1091	4	-	Nicotiana glutinosa	core promoter element	Other elements
AshCOL08	CAAT-box	CAAT	1136	4	-	Nicotiana glutinosa	core promoter element	Other elements
AshCOL08	CAAT-box	CAAAT	1186	5	+	Pisum sativum	core promoter element	Other elements
AshCOL08	CAAT-box	CAAT	1276	4	+	Nicotiana glutinosa	core promoter element	Other elements
AshCOL08	CAAT-box	CAAT	1314	4	+	Nicotiana glutinosa	core promoter element	Other elements
AshCOL08	CAAT-box	CAAT	1319	4	-	Nicotiana glutinosa	core promoter element	Other elements
AshCOL08	CAAT-box	CAAAT	1353	5	-	Pisum sativum	core promoter element	Other elements
AshCOL08	CAAT-box	CAAT	1398	4	+	Nicotiana glutinosa	core promoter element	Other elements
AshCOL08	CAAT-box	CAAT	1444	4	-	Nicotiana glutinosa	core promoter element	Other elements
AshCOL08	CAAT-box	CAAT	1454	4	+	Nicotiana glutinosa	core promoter element	Other elements
AshCOL08	CAAT-box	CAAT	1466	4	-	Nicotiana glutinosa	core promoter element	Other elements
AshCOL08	CAAT-box	CAAAT	1566	5	+	Pisum sativum	core promoter element	Other elements
AshCOL08	CAAT-box	CAAT	1623	4	-	Nicotiana glutinosa	core promoter element	Other elements
AshCOL08	CAAT-box	CAAAT	1720	5	-	Pisum sativum	core promoter element	Other elements
AshCOL08	CAAT-box	CAAT	1844	4	+	Nicotiana glutinosa	core promoter element	Other elements
AshCOL08	CAAT-box	CAAT	1886	4	-	Nicotiana glutinosa	core promoter element	Other elements
AshCOL08	F-box	CTATTCTCATT	1550	10	+	Lycopersicon esculentum		Cellular development involved elements
AshCOL08	CCAAT-box	CAACGG	1010	6	-	Hordeum vulgare	MYBHv1 binding site	Other elements
AshCOL08	TCT-motif	TCTTAC	1484	6	+	Arabidopsis thaliana	Light responsive	Light responsive elements
AshCOL08	TCA-element	CCATCTTTTT	1780	9	+	Nicotiana tabacum	cis-acting element involved in salicylic acid responsiveness	Plant hormone response elements
AshCOL08	MYB	CAACAG	341	6	-	Arabidopsis thaliana	MYB binding site involved in the drought, low temperature, salt, ABA, and GA stress responses	Biotic and abiotic stress response elements
AshCOL08	MYB	TAACCA	865	6	-	Arabidopsis thaliana	MYB binding site involved in the drought, low temperature, salt, ABA, and GA stress responses	Biotic and abiotic stress response elements
AshCOL08	AAGAA-motif	GAAAGAA	613	7	-	Avena sativa	Abscisic acid (ABA) responsive	Plant hormone response elements
AshCOL08	CAT-box	GCCACT	1419	6	-	Arabidopsis thaliana	related to meristem specific activation	Cellular development involved elements
AshCOL08	HD-Zip 1	CAAT(A/T)ATTG	1314	8.5	-	Arabidopsis thaliana	element involved in differentiation of the palisade mesophyll cells	Cellular development involved elements
AshCOL08	W-box	TTGACC	752	6	+	Arabidopsis thaliana	responsible for inducing plant genes in response to pathogen attack	Biotic and abiotic stress response elements
AshCOL08	MYB	TAACCA	865	6	-	Arabidopsis thaliana	MYB binding site involved in the drought, low temperature, salt, ABA, and GA stress responses	Biotic and abiotic stress response elements
AshCOL08	GATA-motif	GATAGGA	488	7	-	Arabidopsis thaliana	Light responsive	Light responsive elements
AshCOL08	GATA-motif	AAGGATAAGG	1208	9	+	Solanum tuberosum	Light responsive	Light responsive elements
AshCOL08	MYB	CCGTTG	1010	6	+	Arabidopsis thaliana	MYB binding site involved in the drought, low temperature, salt, ABA, and GA stress responses	Biotic and abiotic stress response elements
AshCOL08	STRE	AGGGG	411	5	-	Arabidopsis thaliana	stress response element (STRE)	Biotic and abiotic stress response elements
AshCOL08	STRE	AGGGG	497	5	-	Arabidopsis thaliana	stress response element (STRE)	Biotic and abiotic stress response elements
AshCOL08	STRE	AGGGG	641	5	+	Arabidopsis thaliana	stress response element (STRE)	Biotic and abiotic stress response elements
AshCOL08	STRE	AGGGG	902	5	+	Arabidopsis thaliana	stress response element (STRE)	Biotic and abiotic stress response elements
AshCOL08	STRE	AGGGG	1713	5	+	Arabidopsis thaliana	stress response element (STRE)	Biotic and abiotic stress response elements
AshCOL08	STRE	AGGGG	1900	5	-	Arabidopsis thaliana	stress response element (STRE)	Biotic and abiotic stress response elements
AshCOL08	P-box	CCTTTTG	459	7	-	Oryza sativa	gibberellin responsive	Plant hormone response elements
AshCOL09	TCA	TCATCTTCAT	1459	9	-	Pisum sativum	cis-acting element involved in salicylic acid responsiveness	Plant hormone response elements
AshCOL09	TCA	TCATCTTCAT	1793	9	+	Pisum sativum	cis-acting element involved in salicylic acid responsiveness	Plant hormone response elements
AshCOL09	ARE	AAACCA	483	6	+	Zea mays	cis-acting regulatory element essential for the anaerobic induction	Cellular development involved elements
AshCOL09	TCCC-motif	TCTCCCT	606	7	-	Spinacia oleracea	Light responsive	Light responsive elements
AshCOL09	TCCC-motif	TCTCCCT	1418	7	-	Spinacia oleracea	Light responsive	Light responsive elements
AshCOL09	CGTCA-motif	CGTCA	538	5	-	Hordeum vulgare	cis-acting regulatory element involved in the MeJA-responsiveness	Plant hormone response elements
AshCOL09	CGTCA-motif	CGTCA	1252	5	-	Hordeum vulgare	cis-acting regulatory element involved in the MeJA-responsiveness	Plant hormone response elements
AshCOL09	G-Box	CACGTT	913	6	+	Pisum sativum	Light responsive	Light responsive elements
AshCOL09	G-Box	CACGTT	946	6	+	Pisum sativum	Light responsive	Light responsive elements
AshCOL09	DRE core	GCCGAC	564	6	-	Arabidopsis thaliana	Drought-Responsive Element	Biotic and abiotic stress response elements
AshCOL09	TATA-box	TATAA	133	5	-	Arabidopsis thaliana	core promoter element	Other elements
AshCOL09	TATA-box	ATATAA	165	6	+	Brassica oleracea	core promoter element	Other elements
AshCOL09	TATA-box	ATATAT	199	6	+	Brassica napus	core promoter element	Other elements
AshCOL09	TATA-box	ATTATA	215	6	+	Brassica napus	core promoter element	Other elements
AshCOL09	TATA-box	TATA	263	4	+	Arabidopsis thaliana	core promoter element	Other elements
AshCOL09	TATA-box	TACAAAA	283	7	+	Oryza sativa	core promoter element	Other elements
AshCOL09	TATA-box	TATA	320	4	+	Arabidopsis thaliana	core promoter element	Other elements
AshCOL09	TATA-box	TACAAAA	402	7	+	Oryza sativa	core promoter element	Other elements
AshCOL09	TATA-box	ATATAT	408	6	+	Brassica napus	core promoter element	Other elements
AshCOL09	TATA-box	TATA	442	4	+	Arabidopsis thaliana	core promoter element	Other elements
AshCOL09	TATA-box	ATATAA	462	6	+	Brassica oleracea	core promoter element	Other elements
AshCOL09	TATA-box	ATATAA	673	6	+	Brassica oleracea	core promoter element	Other elements
AshCOL09	TATA-box	TACAAAA	746	7	-	Oryza sativa	core promoter element	Other elements
AshCOL09	TATA-box	TACATAAA	751	8	+	Oryza sativa	core promoter element	Other elements
AshCOL09	TATA-box	ATTATA	959	6	+	Brassica napus	core promoter element	Other elements
AshCOL09	TATA-box	ATTATA	1073	6	+	Brassica napus	core promoter element	Other elements
AshCOL09	TATA-box	TATA	1133	4	-	Arabidopsis thaliana	core promoter element	Other elements
AshCOL09	TATA-box	TATATA	1141	6	-	Arabidopsis thaliana	core promoter element	Other elements
AshCOL09	TATA-box	TATAAGAA	1536	8	-	Zea mays	core promoter element	Other elements
AshCOL09	TATA-box	TACAAAA	1641	7	+	Oryza sativa	core promoter element	Other elements
AshCOL09	TATA-box	ATTATA	1676	6	+	Brassica napus	core promoter element	Other elements
AshCOL09	TATA-box	TATA	1696	4	-	Arabidopsis thaliana	core promoter element	Other elements
AshCOL09	TATA-box	ATTATA	1757	6	+	Brassica napus	core promoter element	Other elements
AshCOL09	TATA-box	TATATAA	1839	7	-	Arabidopsis thaliana	core promoter element	Other elements
AshCOL09	AE-box	AGAAACAA	644	8	-	Arabidopsis thaliana	Light responsive	Light responsive elements
AshCOL09	TATA-box	TATATA	200	6	+	Arabidopsis thaliana	core promoter element	Other elements
AshCOL09	TATA-box	TATATA	1141	6	-	Arabidopsis thaliana	core promoter element	Other elements
AshCOL09	TATA-box	TATATA	1840	6	-	Arabidopsis thaliana	core promoter element	Other elements
AshCOL09	MYC	CATTTG	21	6	+	Arabidopsis thaliana	MYC binding site involved in the drought, salt, and ABA stress responses	Biotic and abiotic stress response elements
AshCOL09	MYC	CATTTG	840	6	+	Arabidopsis thaliana	MYC binding site involved in the drought, salt, and ABA stress responses	Biotic and abiotic stress response elements
AshCOL09	MYC	CATGTG	1283	6	+	Arabidopsis thaliana	MYC binding site involved in the drought, salt, and ABA stress responses	Biotic and abiotic stress response elements
AshCOL09	G-box	TACGTG	1556	6	-	Arabidopsis thaliana	Light responsive	Light responsive elements
AshCOL09	MBS	CAACTG	44	6	+	Arabidopsis thaliana	MYB binding site involved in the drought, low temperature, salt, ABA, and GA stress responses	Biotic and abiotic stress response elements
AshCOL09	Box-4	ATTAAT	91	6	+	Petroselinum crispum	Light responsive	Light responsive elements
AshCOL09	Box-4	ATTAAT	1689	6	-	Petroselinum crispum	Light responsive	Light responsive elements
AshCOL09	CAAT-box	CAAAT	22	5	-	Pisum sativum	core promoter element	Other elements
AshCOL09	CAAT-box	CAAAT	137	5	-	Pisum sativum	core promoter element	Other elements
AshCOL09	CAAT-box	CAAT	197	4	+	Nicotiana glutinosa	core promoter element	Other elements
AshCOL09	CAAT-box	CAAAT	273	5	+	Pisum sativum	core promoter element	Other elements
AshCOL09	CAAT-box	CAAAT	487	5	+	Pisum sativum	core promoter element	Other elements
AshCOL09	CAAT-box	CAAT	536	4	-	Nicotiana glutinosa	core promoter element	Other elements
AshCOL09	CAAT-box	CAAT	599	4	-	Nicotiana glutinosa	core promoter element	Other elements
AshCOL09	CAAT-box	CCAAT	664	5	+	Arabidopsis thaliana	core promoter element	Other elements
AshCOL09	CAAT-box	CAAT	796	4	-	Nicotiana glutinosa	core promoter element	Other elements
AshCOL09	CAAT-box	CAAAT	841	5	-	Pisum sativum	core promoter element	Other elements
AshCOL09	CAAT-box	CAAT	846	4	+	Nicotiana glutinosa	core promoter element	Other elements
AshCOL09	CAAT-box	CAAT	851	4	-	Nicotiana glutinosa	core promoter element	Other elements
AshCOL09	CAAT-box	CCAAT	860	5	+	Arabidopsis thaliana	core promoter element	Other elements
AshCOL09	CAAT-box	CAAT	998	4	-	Nicotiana glutinosa	core promoter element	Other elements
AshCOL09	CAAT-box	CAAAT	1003	5	-	Pisum sativum	core promoter element	Other elements
AshCOL09	CAAT-box	CAAT	1136	4	-	Nicotiana glutinosa	core promoter element	Other elements
AshCOL09	CAAT-box	CAAT	1226	4	+	Nicotiana glutinosa	core promoter element	Other elements
AshCOL09	CAAT-box	CAAAT	1272	5	+	Pisum sativum	core promoter element	Other elements
AshCOL09	CAAT-box	CAAAT	1297	5	-	Pisum sativum	core promoter element	Other elements
AshCOL09	CAAT-box	CAAAT	1328	5	+	Pisum sativum	core promoter element	Other elements
AshCOL09	CAAT-box	CAAT	1530	4	-	Nicotiana glutinosa	core promoter element	Other elements
AshCOL09	CAAT-box	CAAT	1609	4	-	Nicotiana glutinosa	core promoter element	Other elements
AshCOL09	CAAT-box	CAAT	1648	4	-	Nicotiana glutinosa	core promoter element	Other elements
AshCOL09	CAAT-box	CAAT	1667	4	-	Nicotiana glutinosa	core promoter element	Other elements
AshCOL09	CAAT-box	CAAAT	1711	5	-	Pisum sativum	core promoter element	Other elements
AshCOL09	CAAT-box	CAAT	1814	4	+	Nicotiana glutinosa	core promoter element	Other elements
AshCOL09	CAAT-box	CAAAT	1823	5	+	Pisum sativum	core promoter element	Other elements
AshCOL09	CAAT-box	CAAT	1890	4	+	Nicotiana glutinosa	core promoter element	Other elements
AshCOL09	ABRE	ACGTG	913	5	-	Arabidopsis thaliana	Abscisic acid (ABA) responsive	Plant hormone response elements
AshCOL09	ABRE	ACGTG	946	5	-	Arabidopsis thaliana	Abscisic acid (ABA) responsive	Plant hormone response elements
AshCOL09	ABRE	ACGTG	1556	5	-	Arabidopsis thaliana	Abscisic acid (ABA) responsive	Plant hormone response elements
AshCOL09	TGACG-motif	TGACG	538	5	+	Hordeum vulgare	cis-acting regulatory element involved in the MeJA-responsiveness	Plant hormone response elements
AshCOL09	TGACG-motif	TGACG	1252	5	+	Hordeum vulgare	cis-acting regulatory element involved in the MeJA-responsiveness	Plant hormone response elements
AshCOL09	ABRE	CACGTA	1556	6	+	Zea mays	Abscisic acid (ABA) responsive	Plant hormone response elements
AshCOL09	Sp1	GGGCGG	1919	6	-	Oryza sativa	Light responsive	Light responsive elements
AshCOL09	ABRE	TACGTG	1556	6	-	Zea mays	Abscisic acid (ABA) responsive	Plant hormone response elements
AshCOL09	ERE	ATTTCATA	373	8	-	Nicotiana glutinos	estrogen responsive element (ERE)	Plant hormone response elements
AshCOL09	ERE	ATTTCATA	1189	8	-	Nicotiana glutinos	estrogen responsive element (ERE)	Plant hormone response elements
AshCOL09	ERE	ATTTTAAA	1589	8	-	Nicotiana glutinos	estrogen responsive element (ERE)	Plant hormone response elements
AshCOL09	TCT-motif	TCTTAC	1350	6	-	Arabidopsis thaliana	Light responsive	Light responsive elements
AshCOL09	TCT-motif	TCTTAC	1551	6	+	Arabidopsis thaliana	Light responsive	Light responsive elements
AshCOL09	as-1	TGACG	538	5	+	Arabidopsis thaliana	cis-acting element involved in salicylic acid responsiveness	Plant hormone response elements
AshCOL09	as-1	TGACG	1252	5	+	Arabidopsis thaliana	cis-acting element involved in salicylic acid responsiveness	Plant hormone response elements
AshCOL09	TGA-element	AACGAC	1612	6	-	Brassica oleracea	auxin-responsive element	Plant hormone response elements
AshCOL09	circadian	CAAAGATATC	99	9	+	Lycopersicon esculentum	cis-acting regulatory element involved in circadian control	Cellular development involved elements
AshCOL09	circadian	CAAAGATATC	1366	9	+	Lycopersicon esculentum	cis-acting regulatory element involved in circadian control	Cellular development involved elements
AshCOL09	HD-Zip 1	CAAT(A/T)ATTG	846	8.5	+	Arabidopsis thaliana	element involved in differentiation of the palisade mesophyll cells	Cellular development involved elements
AshCOL09	AAGAA-motif	GAAAGAA	637	7	-	Avena sativa	Abscisic acid (ABA) responsive	Plant hormone response elements
AshCOL09	MYB	TAACCA	765	6	+	Arabidopsis thaliana	MYB binding site involved in the drought, low temperature, salt, ABA, and GA stress responses	Biotic and abiotic stress response elements
AshCOL09	MYB	CAACCA	1208	6	-	Arabidopsis thaliana	MYB binding site involved in the drought, low temperature, salt, ABA, and GA stress responses	Biotic and abiotic stress response elements
AshCOL09	GT1-motif	GGTTAA	762	6	+	Arabidopsis thaliana	Light responsive	Light responsive elements
AshCOL09	GT1-motif	GGTTAA	764	6	-	Arabidopsis thaliana	Light responsive	Light responsive elements
AshCOL09	STRE	AGGGG	118	5	-	Arabidopsis thaliana	stress response element (STRE)	Biotic and abiotic stress response elements
AshCOL09	STRE	AGGGG	160	5	+	Arabidopsis thaliana	stress response element (STRE)	Biotic and abiotic stress response elements
AshCOL09	STRE	AGGGG	824	5	+	Arabidopsis thaliana	stress response element (STRE)	Biotic and abiotic stress response elements
AshCOL09	I-box	GTATAAGGCC	462	9	+	Larix laricina	Light responsive	Light responsive elements
AshCOL09	I-box	cGATAAGGCG	558	9	-	Zea mays	Light responsive	Light responsive elements
AshCOL09	O2-site	GATGACATGG	1603	9	+	Zea mays	cis-acting regulatory element involved in zein metabolism regulation	Cellular development involved elements
AshCOL09	GATA-motif	GATAGGG	821	7	+	Pisum sativum	Light responsive	Light responsive elements
AshCOL09	W-box	TTGACC	1440	6	+	Arabidopsis thaliana	responsible for inducing plant genes in response to pathogen attack	Biotic and abiotic stress response elements
AshCOL09	MYB	TAACCA	765	6	+	Arabidopsis thaliana	MYB binding site involved in the drought, low temperature, salt, ABA, and GA stress responses	Biotic and abiotic stress response elements
AshCOL09	MYB	CAACTG	44	6	+	Arabidopsis thaliana	MYB binding site involved in the drought, low temperature, salt, ABA, and GA stress responses	Biotic and abiotic stress response elements
AshCOL09	MYB	TAACTG	389	6	-	Arabidopsis thaliana	MYB binding site involved in the drought, low temperature, salt, ABA, and GA stress responses	Biotic and abiotic stress response elements
AshCOL09	LAMP-element	CTTTATCA	922	8	-	Pisum sativum	Light responsive	Light responsive elements
AshCOL09	chs-CMA2a	TCACTTGA	521	8	-	Petroselinum crispum	Light responsive	Light responsive elements
AshCOL09	chs-CMA2a	TCACTTGA	777	8	-	Petroselinum crispum	Light responsive	Light responsive elements
AshCOL10	MRE	AACCTAA	1801	7	+	Petroselinum crispum	MYB binding site involved in light responsiveness	Light responsive elements
AshCOL10	CGTCA-motif	CGTCA	418	5	-	Hordeum vulgare	cis-acting regulatory element involved in the MeJA-responsiveness	Plant hormone response elements
AshCOL10	CGTCA-motif	CGTCA	425	5	-	Hordeum vulgare	cis-acting regulatory element involved in the MeJA-responsiveness	Plant hormone response elements
AshCOL10	CGTCA-motif	CGTCA	1643	5	-	Hordeum vulgare	cis-acting regulatory element involved in the MeJA-responsiveness	Plant hormone response elements
AshCOL10	CGTCA-motif	CGTCA	1829	5	+	Hordeum vulgare	cis-acting regulatory element involved in the MeJA-responsiveness	Plant hormone response elements
AshCOL10	ARE	AAACCA	1134	6	+	Zea mays	cis-acting regulatory element essential for the anaerobic induction	Cellular development involved elements
AshCOL10	CCGTCC-box	CCGTCC	454	6	-	Petroselinum hortense	related to meristem specific activation	Cellular development involved elements
AshCOL10	CCGTCC-box	CCGTCC	1112	6	+	Petroselinum hortense	related to meristem specific activation	Cellular development involved elements
AshCOL10	CCGTCC-box	CCGTCC	1582	6	-	Petroselinum hortense	related to meristem specific activation	Cellular development involved elements
AshCOL10	CCGTCC-box	CCGTCC	1897	6	+	Petroselinum hortense	related to meristem specific activation	Cellular development involved elements
AshCOL10	Box-4	ATTAAT	588	6	+	Petroselinum crispum	Light responsive	Light responsive elements
AshCOL10	Box-4	ATTAAT	753	6	+	Petroselinum crispum	Light responsive	Light responsive elements
AshCOL10	MYC	CATGTG	803	6	+	Arabidopsis thaliana	MYC binding site involved in the drought, salt, and ABA stress responses	Biotic and abiotic stress response elements
AshCOL10	MYC	CATTTG	915	6	-	Arabidopsis thaliana	MYC binding site involved in the drought, salt, and ABA stress responses	Biotic and abiotic stress response elements
AshCOL10	MYC	CATGTG	1556	6	+	Arabidopsis thaliana	MYC binding site involved in the drought, salt, and ABA stress responses	Biotic and abiotic stress response elements
AshCOL10	G-box	CACGTC	419	6	-	Zea mays	Light responsive	Light responsive elements
AshCOL10	G-box	ACACGTGGC	1032	9	-	Brassica napus	Light responsive	Light responsive elements
AshCOL10	G-box	CACGTG	1034	6	-	Arabidopsis thaliana	Light responsive	Light responsive elements
AshCOL10	G-box	GCCACGTGGA	1136	9	-	Arabidopsis thaliana	Light responsive	Light responsive elements
AshCOL10	G-box	CACGTG	1138	6	-	Arabidopsis thaliana	Light responsive	Light responsive elements
AshCOL10	G-box	CACGAC	1145	6	+	Zea mays	Light responsive	Light responsive elements
AshCOL10	G-box	CACGAC	1549	6	-	Zea mays	Light responsive	Light responsive elements
AshCOL10	G-box	CACGAC	1676	6	+	Zea mays	Light responsive	Light responsive elements
AshCOL10	G-box	CACGTC	1930	6	+	Zea mays	Light responsive	Light responsive elements
AshCOL10	TATA-box	TATATA	553	6	+	Arabidopsis thaliana	core promoter element	Other elements
AshCOL10	TATA-box	TATATAAA	577	8	-	Arabidopsis thaliana	core promoter element	Other elements
AshCOL10	TATA-box	TATATA	638	6	+	Arabidopsis thaliana	core promoter element	Other elements
AshCOL10	DRE core	GCCGAC	396	6	-	Arabidopsis thaliana	Drought-Responsive Element	Biotic and abiotic stress response elements
AshCOL10	G-Box	CACGTG	1034	6	-	Pisum sativum	Light responsive	Light responsive elements
AshCOL10	G-Box	CACGTG	1138	6	-	Pisum sativum	Light responsive	Light responsive elements
AshCOL10	G-Box	TCCACATGGCA	1553	10	-	Triticum aestivum	Light responsive	Light responsive elements
AshCOL10	TATA-box	tcTATAAATAgg	268	11	+	Nicotiana tabacum	core promoter element	Other elements
AshCOL10	TATA-box	TATAA	387	5	-	Arabidopsis thaliana	core promoter element	Other elements
AshCOL10	TATA-box	ATTATA	492	6	+	Brassica napus	core promoter element	Other elements
AshCOL10	TATA-box	TATTTAAA	512	8	-	Arabidopsis thaliana	core promoter element	Other elements
AshCOL10	TATA-box	ATATAT	552	6	+	Brassica napus	core promoter element	Other elements
AshCOL10	TATA-box	taTATAAAtc	575	9	-	Arabidopsis thaliana	core promoter element	Other elements
AshCOL10	TATA-box	TATA	629	4	+	Arabidopsis thaliana	core promoter element	Other elements
AshCOL10	TATA-box	ATATAT	637	6	+	Brassica napus	core promoter element	Other elements
AshCOL10	TATA-box	taTATAAAtc	645	9	-	Arabidopsis thaliana	core promoter element	Other elements
AshCOL10	TATA-box	TACATAAA	679	8	+	Oryza sativa	core promoter element	Other elements
AshCOL10	TATA-box	TATTTAAA	693	8	+	Arabidopsis thaliana	core promoter element	Other elements
AshCOL10	TATA-box	TATAAAA	740	7	-	Pisum sativum	core promoter element	Other elements
AshCOL10	TATA-box	TATTTAAA	787	8	-	Arabidopsis thaliana	core promoter element	Other elements
AshCOL10	TATA-box	TACAAAA	817	7	-	Oryza sativa	core promoter element	Other elements
AshCOL10	TGACG-motif	TGACG	418	5	+	Hordeum vulgare	cis-acting regulatory element involved in the MeJA-responsiveness	Plant hormone response elements
AshCOL10	TGACG-motif	TGACG	425	5	+	Hordeum vulgare	cis-acting regulatory element involved in the MeJA-responsiveness	Plant hormone response elements
AshCOL10	TGACG-motif	TGACG	1643	5	+	Hordeum vulgare	cis-acting regulatory element involved in the MeJA-responsiveness	Plant hormone response elements
AshCOL10	TGACG-motif	TGACG	1829	5	-	Hordeum vulgare	cis-acting regulatory element involved in the MeJA-responsiveness	Plant hormone response elements
AshCOL10	CAAT-box	CCAAT	69	5	-	Arabidopsis thaliana	core promoter element	Other elements
AshCOL10	CAAT-box	CCAAT	87	5	-	Arabidopsis thaliana	core promoter element	Other elements
AshCOL10	CAAT-box	CAAT	184	4	-	Nicotiana glutinosa	core promoter element	Other elements
AshCOL10	CAAT-box	CAAAT	295	5	-	Pisum sativum	core promoter element	Other elements
AshCOL10	CAAT-box	CCAAT	460	5	+	Arabidopsis thaliana	core promoter element	Other elements
AshCOL10	CAAT-box	CCAAT	489	5	+	Arabidopsis thaliana	core promoter element	Other elements
AshCOL10	CAAT-box	CAAAT	585	5	+	Pisum sativum	core promoter element	Other elements
AshCOL10	CAAT-box	CAAT	811	4	-	Nicotiana glutinosa	core promoter element	Other elements
AshCOL10	CAAT-box	CAAAT	876	5	+	Pisum sativum	core promoter element	Other elements
AshCOL10	CAAT-box	CAAT	899	4	+	Nicotiana glutinosa	core promoter element	Other elements
AshCOL10	CAAT-box	CAAAT	915	5	+	Pisum sativum	core promoter element	Other elements
AshCOL10	CAAT-box	CAAT	957	4	+	Nicotiana glutinosa	core promoter element	Other elements
AshCOL10	CAAT-box	CAAT	1094	4	+	Nicotiana glutinosa	core promoter element	Other elements
AshCOL10	CAAT-box	CAAAT	1123	5	+	Pisum sativum	core promoter element	Other elements
AshCOL10	CAAT-box	CAAT	1218	4	-	Nicotiana glutinosa	core promoter element	Other elements
AshCOL10	CAAT-box	CAAAT	1232	5	-	Pisum sativum	core promoter element	Other elements
AshCOL10	CAAT-box	CAAAT	1480	5	+	Pisum sativum	core promoter element	Other elements
AshCOL10	CAAT-box	CAAT	1495	4	+	Nicotiana glutinosa	core promoter element	Other elements
AshCOL10	CAAT-box	CAAAT	1572	5	-	Pisum sativum	core promoter element	Other elements
AshCOL10	CAAT-box	CAAT	1602	4	-	Nicotiana glutinosa	core promoter element	Other elements
AshCOL10	CAAT-box	CAAAT	1654	5	-	Pisum sativum	core promoter element	Other elements
AshCOL10	CAAT-box	CAAT	1699	4	+	Nicotiana glutinosa	core promoter element	Other elements
AshCOL10	CAAT-box	CAAT	1747	4	+	Nicotiana glutinosa	core promoter element	Other elements
AshCOL10	CAAT-box	CAAAT	1761	5	+	Pisum sativum	core promoter element	Other elements
AshCOL10	CAAT-box	CAAT	1861	4	+	Nicotiana glutinosa	core promoter element	Other elements
AshCOL10	ABRE	ACGTG	420	5	+	Arabidopsis thaliana	Abscisic acid (ABA) responsive	Plant hormone response elements
AshCOL10	ABRE	GCAACGTGTC	1032	9	+	Hordeum vulgare	Abscisic acid (ABA) responsive	Plant hormone response elements
AshCOL10	ABRE	CACGTG	1034	6	-	Arabidopsis thaliana	Abscisic acid (ABA) responsive	Plant hormone response elements
AshCOL10	ABRE	ACGTG	1035	5	+	Arabidopsis thaliana	Abscisic acid (ABA) responsive	Plant hormone response elements
AshCOL10	ABRE	CACGTG	1138	6	-	Arabidopsis thaliana	Abscisic acid (ABA) responsive	Plant hormone response elements
AshCOL10	ABRE	ACGTG	1139	5	+	Arabidopsis thaliana	Abscisic acid (ABA) responsive	Plant hormone response elements
AshCOL10	ABRE	ACGTG	1930	5	-	Arabidopsis thaliana	Abscisic acid (ABA) responsive	Plant hormone response elements
AshCOL10	as-1	TGACG	418	5	+	Arabidopsis thaliana	cis-acting element involved in salicylic acid responsiveness	Plant hormone response elements
AshCOL10	as-1	TGACG	425	5	+	Arabidopsis thaliana	cis-acting element involved in salicylic acid responsiveness	Plant hormone response elements
AshCOL10	as-1	TGACG	1643	5	+	Arabidopsis thaliana	cis-acting element involved in salicylic acid responsiveness	Plant hormone response elements
AshCOL10	as-1	TGACG	1829	5	-	Arabidopsis thaliana	cis-acting element involved in salicylic acid responsiveness	Plant hormone response elements
AshCOL10	WUN-motif	TTATTACAT	675	9	+	Nicotiana glutinosa	wound-responsive element	Biotic and abiotic stress response elements
AshCOL10	WUN-motif	TTATTACAT	712	9	+	Nicotiana glutinosa	wound-responsive element	Biotic and abiotic stress response elements
AshCOL10	WUN-motif	AAATTACT	856	8	-	Nicotiana glutinosa	wound-responsive element	Biotic and abiotic stress response elements
AshCOL10	WUN-motif	CCATTTCAA	951	9	+	Nicotiana glutinosa	wound-responsive element	Biotic and abiotic stress response elements
AshCOL10	ABRE	CCACGTGG	1137	8	-	Zea mays	Abscisic acid (ABA) responsive	Plant hormone response elements
AshCOL10	ERE	ATTTTAAA	565	8	-	Nicotiana glutinos	estrogen responsive element (ERE)	Plant hormone response elements
AshCOL10	ERE	ATTTCATA	728	8	+	Nicotiana glutinos	estrogen responsive element (ERE)	Plant hormone response elements
AshCOL10	ERE	ATTTTAAA	925	8	+	Nicotiana glutinos	estrogen responsive element (ERE)	Plant hormone response elements
AshCOL10	TCT-motif	TCTTAC	1203	6	-	Arabidopsis thaliana	Light responsive	Light responsive elements
AshCOL10	TCT-motif	TCTTAC	1256	6	+	Arabidopsis thaliana	Light responsive	Light responsive elements
AshCOL10	TCA-element	TCAGAAGAGG	1623	9	-	Brassica oleracea	cis-acting element involved in salicylic acid responsiveness	Plant hormone response elements
AshCOL10	box-S	AGCCACC	1024	7	+	Arabidopsis thaliana	Light responsive	Light responsive elements
AshCOL10	TGA-element	AACGAC	160	6	-	Brassica oleracea	auxin-responsive element	Plant hormone response elements
AshCOL10	A-box	CCGTCC	454	6	-	Petroselinum crispum	cis-acting regulatory element	Other elements
AshCOL10	A-box	CCGTCC	1112	6	+	Petroselinum crispum	cis-acting regulatory element	Other elements
AshCOL10	A-box	CCGTCC	1582	6	-	Petroselinum crispum	cis-acting regulatory element	Other elements
AshCOL10	A-box	CCGTCC	1897	6	+	Petroselinum crispum	cis-acting regulatory element	Other elements
AshCOL10	GT1-motif	GGTTAA	60	6	+	Arabidopsis thaliana	Light responsive	Light responsive elements
AshCOL10	GT1-motif	GGTTAA	1767	6	+	Arabidopsis thaliana	Light responsive	Light responsive elements
AshCOL10	GT1-motif	GGTTAA	1769	6	-	Arabidopsis thaliana	Light responsive	Light responsive elements
AshCOL10	GT1-motif	GGTTAA	1797	6	+	Arabidopsis thaliana	Light responsive	Light responsive elements
AshCOL10	GT1-motif	GGTTAA	1799	6	-	Arabidopsis thaliana	Light responsive	Light responsive elements
AshCOL10	MYB	TAACCA	59	6	-	Arabidopsis thaliana	MYB binding site involved in the drought, low temperature, salt, ABA, and GA stress responses	Biotic and abiotic stress response elements
AshCOL10	MYB	CAACCA	78	6	-	Arabidopsis thaliana	MYB binding site involved in the drought, low temperature, salt, ABA, and GA stress responses	Biotic and abiotic stress response elements
AshCOL10	MYB	CAACCA	486	6	+	Arabidopsis thaliana	MYB binding site involved in the drought, low temperature, salt, ABA, and GA stress responses	Biotic and abiotic stress response elements
AshCOL10	MYB	CAACCA	1729	6	+	Arabidopsis thaliana	MYB binding site involved in the drought, low temperature, salt, ABA, and GA stress responses	Biotic and abiotic stress response elements
AshCOL10	AAGAA-motif	GAAAGAA	1846	7	-	Avena sativa	Abscisic acid (ABA) responsive	Plant hormone response elements
AshCOL10	CCGTCC-box	CCGTCC	454	6	-	Nicotiana tabacum	related to meristem specific activation	Cellular development involved elements
AshCOL10	MYB	TAACCA	59	6	-	Arabidopsis thaliana	MYB binding site involved in the drought, low temperature, salt, ABA, and GA stress responses	Biotic and abiotic stress response elements
AshCOL10	W-box	TTGACC	896	6	-	Arabidopsis thaliana	responsible for inducing plant genes in response to pathogen attack	Biotic and abiotic stress response elements
AshCOL10	O2-site	GATGACATGG	1103	10	-	Zea mays	cis-acting regulatory element involved in zein metabolism regulation	Cellular development involved elements
AshCOL10	O2-site	GATGACATGG	1587	9	+	Zea mays	cis-acting regulatory element involved in zein metabolism regulation	Cellular development involved elements
AshCOL10	STRE	AGGGG	109	5	+	Arabidopsis thaliana	stress response element (STRE)	Biotic and abiotic stress response elements
AshCOL10	STRE	AGGGG	531	5	-	Arabidopsis thaliana	stress response element (STRE)	Biotic and abiotic stress response elements
AshCOL10	chs-CMA2a	TCACTTGA	1780	8	+	Petroselinum crispum	Light responsive	Light responsive elements
AshCOL10	Box II	CCACGTGGC	1137	9	+	Petroselinum crispum	Light responsive	Light responsive elements
AshCOL10	TATC-box	TATCCCA	947	7	+	Oryza sativa	gibberellin responsive	Plant hormone response elements
DcaCOL01	LTR	CCGAAA	1045	6	-	Hordeum vulgare	cis-acting element involved in low-temperature responsiveness	Biotic and abiotic stress response elements
DcaCOL01	GATA-motif	AAGATAAGATT	102	10	+	Arabidopsis thaliana	Light responsive	Light responsive elements
DcaCOL01	MYB	TAACCA	71	6	+	Arabidopsis thaliana	MYB binding site involved in the drought, low temperature, salt, ABA, and GA stress responses	Biotic and abiotic stress response elements
DcaCOL01	MYB	TAACCA	1058	6	-	Arabidopsis thaliana	MYB binding site involved in the drought, low temperature, salt, ABA, and GA stress responses	Biotic and abiotic stress response elements
DcaCOL01	MYB	TAACCA	1733	6	-	Arabidopsis thaliana	MYB binding site involved in the drought, low temperature, salt, ABA, and GA stress responses	Biotic and abiotic stress response elements
DcaCOL01	MYB	TAACTG	115	6	-	Arabidopsis thaliana	MYB binding site involved in the drought, low temperature, salt, ABA, and GA stress responses	Biotic and abiotic stress response elements
DcaCOL01	MYB	CAACTG	1227	6	+	Arabidopsis thaliana	MYB binding site involved in the drought, low temperature, salt, ABA, and GA stress responses	Biotic and abiotic stress response elements
DcaCOL01	MYB	CAACTG	1974	6	+	Arabidopsis thaliana	MYB binding site involved in the drought, low temperature, salt, ABA, and GA stress responses	Biotic and abiotic stress response elements
DcaCOL01	GT1-motif	GGTTAA	1059	6	+	Arabidopsis thaliana	Light responsive	Light responsive elements
DcaCOL01	MYB	CAACCA	57	6	+	Arabidopsis thaliana	MYB binding site involved in the drought, low temperature, salt, ABA, and GA stress responses	Biotic and abiotic stress response elements
DcaCOL01	MYB	TAACCA	71	6	+	Arabidopsis thaliana	MYB binding site involved in the drought, low temperature, salt, ABA, and GA stress responses	Biotic and abiotic stress response elements
DcaCOL01	MYB	TAACCA	1058	6	-	Arabidopsis thaliana	MYB binding site involved in the drought, low temperature, salt, ABA, and GA stress responses	Biotic and abiotic stress response elements
DcaCOL01	MYB	CAACCA	1283	6	+	Arabidopsis thaliana	MYB binding site involved in the drought, low temperature, salt, ABA, and GA stress responses	Biotic and abiotic stress response elements
DcaCOL01	MYB	TAACCA	1733	6	-	Arabidopsis thaliana	MYB binding site involved in the drought, low temperature, salt, ABA, and GA stress responses	Biotic and abiotic stress response elements
DcaCOL01	MYB	CAACCA	1740	6	-	Arabidopsis thaliana	MYB binding site involved in the drought, low temperature, salt, ABA, and GA stress responses	Biotic and abiotic stress response elements
DcaCOL01	AAGAA-motif	GAAAGAA	1502	7	-	Avena sativa	Abscisic acid (ABA) responsive	Plant hormone response elements
DcaCOL01	WUN-motif	AAATTTCCT	439	9	+	Brassica oleracea	wound-responsive element	Biotic and abiotic stress response elements
DcaCOL01	WUN-motif	AAATTTCTT	534	9	+	Nicotiana glutinosa	wound-responsive element	Biotic and abiotic stress response elements
DcaCOL01	WUN-motif	AAATTTCTT	794	9	-	Nicotiana glutinosa	wound-responsive element	Biotic and abiotic stress response elements
DcaCOL01	F-box	CTATTCTCATT	643	10	+	Lycopersicon esculentum		Cellular development involved elements
DcaCOL01	as-1	TGACG	1567	5	+	Arabidopsis thaliana	cis-acting element involved in salicylic acid responsiveness	Plant hormone response elements
DcaCOL01	as-1	TGACG	1905	5	-	Arabidopsis thaliana	cis-acting element involved in salicylic acid responsiveness	Plant hormone response elements
DcaCOL01	TCT-motif	TCTTAC	333	6	+	Arabidopsis thaliana	Light responsive	Light responsive elements
DcaCOL01	TCT-motif	TCTTAC	1172	6	+	Arabidopsis thaliana	Light responsive	Light responsive elements
DcaCOL01	ERE	ATTTTAAA	541	8	-	Nicotiana glutinos	estrogen responsive element (ERE)	Plant hormone response elements
DcaCOL01	GA-motif	ATAGATAA	308	8	+	Arabidopsis thaliana	Light responsive	Light responsive elements
DcaCOL01	WRE3	CCACCT	1802	6	-	Pisum sativum	wound-responsive elements	Biotic and abiotic stress response elements
DcaCOL01	ABRE	CACGTG	1389	6	-	Arabidopsis thaliana	Abscisic acid (ABA) responsive	Plant hormone response elements
DcaCOL01	ABRE	ACGTG	1390	5	+	Arabidopsis thaliana	Abscisic acid (ABA) responsive	Plant hormone response elements
DcaCOL01	CAAT-box	CAAT	25	4	+	Nicotiana glutinosa	core promoter element	Light responsive elements
DcaCOL01	CAAT-box	CAAAT	61	5	+	Pisum sativum	core promoter element	Light responsive elements
DcaCOL01	CAAT-box	CAAT	89	4	-	Nicotiana glutinosa	core promoter element	Light responsive elements
DcaCOL01	CAAT-box	CAAT	187	4	-	Nicotiana glutinosa	core promoter element	Light responsive elements
DcaCOL01	CAAT-box	CCAAT	211	5	-	Arabidopsis thaliana	core promoter element	Light responsive elements
DcaCOL01	CAAT-box	CAAT	252	4	+	Nicotiana glutinosa	core promoter element	Light responsive elements
DcaCOL01	CAAT-box	CAAT	452	4	+	Nicotiana glutinosa	core promoter element	Light responsive elements
DcaCOL01	CAAT-box	CAAAT	500	5	-	Pisum sativum	core promoter element	Light responsive elements
DcaCOL01	CAAT-box	CAAAT	533	5	+	Pisum sativum	core promoter element	Light responsive elements
DcaCOL01	CAAT-box	CAAT	584	4	+	Nicotiana glutinosa	core promoter element	Light responsive elements
DcaCOL01	CAAT-box	CAAAT	606	5	-	Pisum sativum	core promoter element	Light responsive elements
DcaCOL01	CAAT-box	CAAT	664	4	-	Nicotiana glutinosa	core promoter element	Light responsive elements
DcaCOL01	CAAT-box	CAAT	734	4	+	Nicotiana glutinosa	core promoter element	Light responsive elements
DcaCOL01	CAAT-box	CAAT	769	4	+	Nicotiana glutinosa	core promoter element	Light responsive elements
DcaCOL01	CAAT-box	CAAAT	776	5	-	Pisum sativum	core promoter element	Light responsive elements
DcaCOL01	CAAT-box	CCAAT	1056	5	-	Arabidopsis thaliana	core promoter element	Light responsive elements
DcaCOL01	CAAT-box	CAAT	1114	4	-	Nicotiana glutinosa	core promoter element	Light responsive elements
DcaCOL01	CAAT-box	CAAT	1143	4	-	Nicotiana glutinosa	core promoter element	Light responsive elements
DcaCOL01	CAAT-box	CCAAT	1191	5	+	Arabidopsis thaliana	core promoter element	Other elements
DcaCOL01	CAAT-box	CAAAT	1206	5	-	Pisum sativum	core promoter element	Other elements
DcaCOL01	CAAT-box	CCAAT	1286	5	+	Arabidopsis thaliana	core promoter element	Other elements
DcaCOL01	CAAT-box	CCAAT	1294	5	+	Arabidopsis thaliana	core promoter element	Other elements
DcaCOL01	CAAT-box	CAAAT	1314	5	+	Pisum sativum	core promoter element	Other elements
DcaCOL01	CAAT-box	CCAAT	1344	5	-	Arabidopsis thaliana	core promoter element	Other elements
DcaCOL01	CAAT-box	CAAT	1419	4	+	Nicotiana glutinosa	core promoter element	Other elements
DcaCOL01	CAAT-box	CAAT	1498	4	+	Nicotiana glutinosa	core promoter element	Other elements
DcaCOL01	CAAT-box	CAAT	1510	4	+	Nicotiana glutinosa	core promoter element	Other elements
DcaCOL01	CAAT-box	CAAT	1588	4	+	Nicotiana glutinosa	core promoter element	Other elements
DcaCOL01	CAAT-box	CAAAT	1621	5	-	Pisum sativum	core promoter element	Other elements
DcaCOL01	CAAT-box	CAAT	1712	4	+	Nicotiana glutinosa	core promoter element	Other elements
DcaCOL01	CAAT-box	CCAAT	1738	5	-	Arabidopsis thaliana	core promoter element	Other elements
DcaCOL01	TGACG-motif	TGACG	1567	5	+	Hordeum vulgare	cis-acting regulatory element involved in the MeJA-responsiveness	Plant hormone response elements
DcaCOL01	TGACG-motif	TGACG	1905	5	-	Hordeum vulgare	cis-acting regulatory element involved in the MeJA-responsiveness	Plant hormone response elements
DcaCOL01	TATA-box	TATAAAAT	1159	8	-	Arabidopsis thaliana	core promoter element around -30 of transcription start	Other elements
DcaCOL01	TATA-box	TATAAAAT	1200	8	+	Arabidopsis thaliana	core promoter element around -30 of transcription start	Other elements
DcaCOL01	MBS	CAACTG	1227	6	+	Arabidopsis thaliana	MYB binding site involved in the drought, low temperature, salt, ABA, and GA stress responses	Biotic and abiotic stress response elements
DcaCOL01	MBS	CAACTG	1974	6	+	Arabidopsis thaliana	MYB binding site involved in the drought, low temperature, salt, ABA, and GA stress responses	Biotic and abiotic stress response elements
DcaCOL01	Box-4	ATTAAT	586	6	+	Petroselinum crispum	Light responsive	Light responsive elements
DcaCOL01	Box-4	ATTAAT	669	6	+	Petroselinum crispum	Light responsive	Light responsive elements
DcaCOL01	Box-4	ATTAAT	915	6	+	Petroselinum crispum	Light responsive	Light responsive elements
DcaCOL01	Box-4	ATTAAT	921	6	+	Petroselinum crispum	Light responsive	Light responsive elements
DcaCOL01	Box-4	ATTAAT	925	6	+	Petroselinum crispum	Light responsive	Light responsive elements
DcaCOL01	Box-4	ATTAAT	963	6	+	Petroselinum crispum	Light responsive	Light responsive elements
DcaCOL01	Box-4	ATTAAT	1004	6	+	Petroselinum crispum	Light responsive	Light responsive elements
DcaCOL01	Box-4	ATTAAT	1010	6	-	Petroselinum crispum	Light responsive	Light responsive elements
DcaCOL01	Box-4	ATTAAT	1147	6	-	Petroselinum crispum	Light responsive	Light responsive elements
DcaCOL01	G-Box	CACGTG	1389	6	-	Pisum sativum	Light responsive	Light responsive elements
DcaCOL01	TATA-box	ATATAT	242	6	+	Brassica napus	core promoter element	Other elements
DcaCOL01	TATA-box	TATACA	305	6	-	Helianthus annuus	core promoter element	Other elements
DcaCOL01	TATA-box	TATAAAT	325	7	-	Brassica juncea	core promoter element	Other elements
DcaCOL01	TATA-box	TATAAAA	411	7	-	Pisum sativum	core promoter element	Other elements
DcaCOL01	TATA-box	TATAAAA	457	7	-	Pisum sativum	core promoter element	Other elements
DcaCOL01	TATA-box	TATTTAAA	571	8	+	Arabidopsis thaliana	core promoter element	Other elements
DcaCOL01	TATA-box	TATAA	676	5	-	Arabidopsis thaliana	core promoter element	Other elements
DcaCOL01	TATA-box	TATA	838	4	+	Arabidopsis thaliana	core promoter element	Other elements
DcaCOL01	TATA-box	taTATAAAtc	872	10	-	Arabidopsis thaliana	core promoter element	Other elements
DcaCOL01	TATA-box	TATAAAA	884	7	-	Pisum sativum	core promoter element	Other elements
DcaCOL01	TATA-box	TATA	912	4	+	Arabidopsis thaliana	core promoter element	Other elements
DcaCOL01	TATA-box	ATATAT	988	6	+	Brassica napus	core promoter element	Other elements
DcaCOL01	TATA-box	TATAAAA	1160	7	-	Pisum sativum	core promoter element	Other elements
DcaCOL01	TATA-box	TATAAA	1198	6	-	Helianthus annuus	core promoter element	Other elements
DcaCOL01	TATA-box	TATACA	1231	6	-	Helianthus annuus	core promoter element	Other elements
DcaCOL01	TATA-box	TATACA	1320	6	-	Helianthus annuus	core promoter element	Other elements
DcaCOL01	TATA-box	TATA	1473	4	-	Arabidopsis thaliana	core promoter element	Other elements
DcaCOL01	TATA-box	TATA	1609	4	-	Arabidopsis thaliana	core promoter element	Other elements
DcaCOL01	TATA-box	TATAA	1630	5	-	Arabidopsis thaliana	core promoter element	Other elements
DcaCOL01	TATA-box	tcTATAAATAgg	1696	11	+	Nicotiana tabacum	core promoter element	Other elements
DcaCOL01	TATA-box	TACAAAA	1759	7	-	Oryza sativa	core promoter element	Other elements
DcaCOL01	TATA-box	TACAAAA	1781	7	-	Oryza sativa	core promoter element	Other elements
DcaCOL01	TATA-box	TATATAAA	874	8	-	Arabidopsis thaliana	core promoter element	Other elements
DcaCOL01	TATA-box	TATATA	1322	6	-	Arabidopsis thaliana	core promoter element	Other elements
DcaCOL01	G-box	CACGTG	1389	6	-	Arabidopsis thaliana	Light responsive	Light responsive elements
DcaCOL01	MYC	CATGTG	82	6	-	Arabidopsis thaliana	MYC binding site involved in the drought, salt, and ABA stress responses	Biotic and abiotic stress response elements
DcaCOL01	MYC	CATTTG	499	6	+	Arabidopsis thaliana	MYC binding site involved in the drought, salt, and ABA stress responses	Biotic and abiotic stress response elements
DcaCOL01	MYC	CAATTG	1192	6	-	Arabidopsis thaliana	MYC binding site involved in the drought, salt, and ABA stress responses	Biotic and abiotic stress response elements
DcaCOL01	MYC	CATTTG	1314	6	-	Arabidopsis thaliana	MYC binding site involved in the drought, salt, and ABA stress responses	Biotic and abiotic stress response elements
DcaCOL01	MYC	CATGTG	1543	6	-	Arabidopsis thaliana	MYC binding site involved in the drought, salt, and ABA stress responses	Biotic and abiotic stress response elements
DcaCOL01	MYC	CATGTG	1545	6	+	Arabidopsis thaliana	MYC binding site involved in the drought, salt, and ABA stress responses	Biotic and abiotic stress response elements
DcaCOL01	MYC	CATGTG	1563	6	-	Arabidopsis thaliana	MYC binding site involved in the drought, salt, and ABA stress responses	Biotic and abiotic stress response elements
DcaCOL01	MYC	CATTTG	1620	6	+	Arabidopsis thaliana	MYC binding site involved in the drought, salt, and ABA stress responses	Biotic and abiotic stress response elements
DcaCOL01	CGTCA-motif	CGTCA	1567	5	-	Hordeum vulgare	cis-acting regulatory element involved in the MeJA-responsiveness	Plant hormone response elements
DcaCOL01	CGTCA-motif	CGTCA	1905	5	+	Hordeum vulgare	cis-acting regulatory element involved in the MeJA-responsiveness	Plant hormone response elements
DcaCOL01	MRE	AACCTAA	351	7	-	Petroselinum crispum	MYB binding site involved in light responsiveness	Light responsive elements
DcaCOL01	ARE	AAACCA	1041	6	-	Zea mays	cis-acting regulatory element essential for the anaerobic induction	Cellular development involved elements
DcaCOL02	G-Box	CACGTT	888	6	-	Pisum sativum	Light responsive	Light responsive elements
DcaCOL02	G-Box	CACGTG	1626	6	-	Pisum sativum	Light responsive	Light responsive elements
DcaCOL02	G-Box	CACGTG	1873	6	-	Pisum sativum	Light responsive	Light responsive elements
DcaCOL02	TATA-box	ATTATA	340	6	+	Brassica napus	core promoter element	Other elements
DcaCOL02	TATA-box	TATACA	633	6	-	Helianthus annuus	core promoter element	Other elements
DcaCOL02	TATA-box	taTATAAAtc	1117	9	-	Arabidopsis thaliana	core promoter element	Other elements
DcaCOL02	TATA-box	ccTATAAAaa	1228	9	-	Arabidopsis thaliana	core promoter element	Other elements
DcaCOL02	TATA-box	TATA	1294	4	-	Arabidopsis thaliana	core promoter element	Other elements
DcaCOL02	TATA-box	ATTATA	1376	6	+	Brassica napus	core promoter element	Other elements
DcaCOL02	TATA-box	TATTTAAA	1462	8	-	Arabidopsis thaliana	core promoter element	Other elements
DcaCOL02	TATA-box	TATA	1487	4	-	Arabidopsis thaliana	core promoter element	Other elements
DcaCOL02	TATA-box	TATATA	1509	6	-	Arabidopsis thaliana	core promoter element	Other elements
DcaCOL02	TATA-box	ATATAT	1536	6	-	Brassica napus	core promoter element	Other elements
DcaCOL02	TATA-box	TACATAAA	1767	8	+	Oryza sativa	core promoter element	Other elements
DcaCOL02	TATA-box	ATTATA	1794	6	+	Brassica napus	core promoter element	Other elements
DcaCOL02	TATA-box	TATAAAAT	1380	8	+	Arabidopsis thaliana	core promoter element around -30 of transcription start	Other elements
DcaCOL02	MBS	CAACTG	240	6	-	Arabidopsis thaliana	MYB binding site involved in the drought, low temperature, salt, ABA, and GA stress responses	Biotic and abiotic stress response elements
DcaCOL02	ARE	AAACCA	46	6	+	Zea mays	cis-acting regulatory element essential for the anaerobic induction	Cellular development involved elements
DcaCOL02	ARE	AAACCA	1390	6	+	Zea mays	cis-acting regulatory element essential for the anaerobic induction	Cellular development involved elements
DcaCOL02	TC-rich repeats	GTTTTCTTAC	1418	9	-	Nicotiana tabacum	cis-acting element involved in defense and stress responsiveness	Biotic and abiotic stress response elements
DcaCOL02	TCT-motif	TCTTAC	1212	6	-	Arabidopsis thaliana	Light responsive	Light responsive elements
DcaCOL02	CAAT-box	CAAT	21	4	-	Nicotiana glutinosa	core promoter element	Other elements
DcaCOL02	CAAT-box	TGCCAAC	92	7	+	Petunia hybrida	core promoter element	Other elements
DcaCOL02	CAAT-box	CAAT	118	4	-	Nicotiana glutinosa	core promoter element	Other elements
DcaCOL02	CAAT-box	CCAAT	187	5	+	Arabidopsis thaliana	core promoter element	Other elements
DcaCOL02	CAAT-box	TGCCAAC	216	7	+	Petunia hybrida	core promoter element	Other elements
DcaCOL02	CAAT-box	CAAT	254	4	+	Nicotiana glutinosa	core promoter element	Other elements
DcaCOL02	CAAT-box	CAAT	266	4	+	Nicotiana glutinosa	core promoter element	Other elements
DcaCOL02	CAAT-box	CAAT	425	4	-	Nicotiana glutinosa	core promoter element	Other elements
DcaCOL02	CAAT-box	CCAAT	452	5	+	Arabidopsis thaliana	core promoter element	Other elements
DcaCOL02	CAAT-box	TGCCAAC	463	7	+	Petunia hybrida	core promoter element	Other elements
DcaCOL02	CAAT-box	CAAT	543	4	-	Nicotiana glutinosa	core promoter element	Other elements
DcaCOL02	CAAT-box	CAAAT	604	5	+	Pisum sativum	core promoter element	Other elements
DcaCOL02	CAAT-box	CCAAT	624	5	+	Arabidopsis thaliana	core promoter element	Other elements
DcaCOL02	CAAT-box	CAAT	700	4	+	Nicotiana glutinosa	core promoter element	Other elements
DcaCOL02	CAAT-box	CAAT	823	4	-	Nicotiana glutinosa	core promoter element	Other elements
DcaCOL02	CAAT-box	CAAAT	910	5	+	Pisum sativum	core promoter element	Other elements
DcaCOL02	CAAT-box	CAAT	1106	4	+	Nicotiana glutinosa	core promoter element	Other elements
DcaCOL02	CAAT-box	CCAAT	1141	5	+	Arabidopsis thaliana	core promoter element	Other elements
DcaCOL02	CAAT-box	CAAAT	1169	5	-	Pisum sativum	core promoter element	Other elements
DcaCOL02	CAAT-box	CAAAT	1184	5	+	Pisum sativum	core promoter element	Other elements
DcaCOL02	CAAT-box	CAAAT	1194	5	+	Pisum sativum	core promoter element	Other elements
DcaCOL02	CAAT-box	CAAT	1273	4	-	Nicotiana glutinosa	core promoter element	Other elements
DcaCOL02	CAAT-box	CAAT	1278	4	-	Nicotiana glutinosa	core promoter element	Other elements
DcaCOL02	CAAT-box	CAAT	1313	4	+	Nicotiana glutinosa	core promoter element	Other elements
DcaCOL02	CAAT-box	CAAT	1534	4	+	Nicotiana glutinosa	core promoter element	Other elements
DcaCOL02	CAAT-box	CAAT	1832	4	+	Nicotiana glutinosa	core promoter element	Other elements
DcaCOL02	CAAT-box	CAAT	1884	4	+	Nicotiana glutinosa	core promoter element	Other elements
DcaCOL02	CAAT-box	CAAT	1998	4	+	Nicotiana glutinosa	core promoter element	Other elements
DcaCOL02	LTR	CCGAAA	654	6	-	Hordeum vulgare	cis-acting element involved in low-temperature responsiveness	Biotic and abiotic stress response elements
DcaCOL02	LTR	CCGAAA	685	6	+	Hordeum vulgare	cis-acting element involved in low-temperature responsiveness	Biotic and abiotic stress response elements
DcaCOL02	LTR	CCGAAA	973	6	-	Hordeum vulgare	cis-acting element involved in low-temperature responsiveness	Biotic and abiotic stress response elements
DcaCOL02	LTR	CCGAAA	1092	6	-	Hordeum vulgare	cis-acting element involved in low-temperature responsiveness	Biotic and abiotic stress response elements
DcaCOL02	STRE	AGGGG	644	5	+	Arabidopsis thaliana	stress response element (STRE)	Biotic and abiotic stress response elements
DcaCOL02	STRE	AGGGG	939	5	+	Arabidopsis thaliana	stress response element (STRE)	Biotic and abiotic stress response elements
DcaCOL02	STRE	AGGGG	1151	5	-	Arabidopsis thaliana	stress response element (STRE)	Biotic and abiotic stress response elements
DcaCOL02	STRE	AGGGG	1620	5	-	Arabidopsis thaliana	stress response element (STRE)	Biotic and abiotic stress response elements
DcaCOL02	STRE	AGGGG	1638	5	-	Arabidopsis thaliana	stress response element (STRE)	Biotic and abiotic stress response elements
DcaCOL02	STRE	AGGGG	1914	5	-	Arabidopsis thaliana	stress response element (STRE)	Biotic and abiotic stress response elements
DcaCOL02	STRE	AGGGG	1926	5	-	Arabidopsis thaliana	stress response element (STRE)	Biotic and abiotic stress response elements
DcaCOL02	MYB	CCGTTG	519	6	+	Arabidopsis thaliana	MYB binding site involved in the drought, low temperature, salt, ABA, and GA stress responses	Biotic and abiotic stress response elements
DcaCOL02	CCGTCC-box	CCGTCC	1710	6	+	Nicotiana tabacum	related to meristem specific activation	Cellular development involved elements
DcaCOL02	MYB	CAACTG	240	6	-	Arabidopsis thaliana	MYB binding site involved in the drought, low temperature, salt, ABA, and GA stress responses	Biotic and abiotic stress response elements
DcaCOL02	TATA-box	TATATA	1121	6	-	Arabidopsis thaliana	core promoter element	Other elements
DcaCOL02	TATA-box	TATATA	1378	6	-	Arabidopsis thaliana	core promoter element	Other elements
DcaCOL02	TATA-box	TATATA	1509	6	-	Arabidopsis thaliana	core promoter element	Other elements
DcaCOL02	TATA-box	TATATA	1537	6	-	Arabidopsis thaliana	core promoter element	Other elements
DcaCOL02	TATA-box	TATATA	1796	6	-	Arabidopsis thaliana	core promoter element	Other elements
DcaCOL02	MYC	CAATTG	266	6	+	Arabidopsis thaliana	MYC binding site involved in the drought, salt, and ABA stress responses	Biotic and abiotic stress response elements
DcaCOL02	MYC	CATTTG	910	6	-	Arabidopsis thaliana	MYC binding site involved in the drought, salt, and ABA stress responses	Biotic and abiotic stress response elements
DcaCOL02	MYC	CATGTG	1578	6	-	Arabidopsis thaliana	MYC binding site involved in the drought, salt, and ABA stress responses	Biotic and abiotic stress response elements
DcaCOL02	G-box	CACGAC	210	6	-	Zea mays	Light responsive	Light responsive elements
DcaCOL02	G-box	TACGTG	1244	6	-	Arabidopsis thaliana	Light responsive	Light responsive elements
DcaCOL02	G-box	CACGTG	1626	6	-	Arabidopsis thaliana	Light responsive	Light responsive elements
DcaCOL02	G-box	CACGTG	1873	6	-	Arabidopsis thaliana	Light responsive	Light responsive elements
DcaCOL02	Box-4	ATTAAT	589	6	+	Petroselinum crispum	Light responsive	Light responsive elements
DcaCOL02	Box-4	ATTAAT	1806	6	-	Petroselinum crispum	Light responsive	Light responsive elements
DcaCOL02	Box-4	ATTAAT	1836	6	-	Petroselinum crispum	Light responsive	Light responsive elements
DcaCOL02	TCA	TCATCTTCAT	1940	9	+	Pisum sativum	cis-acting element involved in salicylic acid responsiveness	Plant hormone response elements
DcaCOL02	CGTCA-motif	CGTCA	181	5	+	Hordeum vulgare	cis-acting regulatory element involved in the MeJA-responsiveness	Plant hormone response elements
DcaCOL02	CGTCA-motif	CGTCA	825	5	-	Hordeum vulgare	cis-acting regulatory element involved in the MeJA-responsiveness	Plant hormone response elements
DcaCOL02	CGTCA-motif	CGTCA	842	5	-	Hordeum vulgare	cis-acting regulatory element involved in the MeJA-responsiveness	Plant hormone response elements
DcaCOL02	CGTCA-motif	CGTCA	901	5	-	Hordeum vulgare	cis-acting regulatory element involved in the MeJA-responsiveness	Plant hormone response elements
DcaCOL02	MYB	CAACAG	569	6	-	Nicotiana tabacum	MYB binding site involved in the drought, low temperature, salt, ABA, and GA stress responses	Biotic and abiotic stress response elements
DcaCOL02	MYB	CAACAG	1643	6	+	Nicotiana tabacum	MYB binding site involved in the drought, low temperature, salt, ABA, and GA stress responses	Biotic and abiotic stress response elements
DcaCOL02	AC-I	(T/C)C(T/C)(C/T)ACC(T/C)ACC	347	8.5	+	Phaseolus vulgaris	involved in xylem specific expression	Cellular development involved elements
DcaCOL02	ERE	ATTTTAAA	1460	8	+	Nicotiana glutinos	estrogen responsive element (ERE)	Plant hormone response elements
DcaCOL02	ERE	ATTTTAAA	1524	8	+	Nicotiana glutinos	estrogen responsive element (ERE)	Plant hormone response elements
DcaCOL02	CCAAT-box	CAACGG	519	6	-	Hordeum vulgare	MYBHv1 binding site	Other elements
DcaCOL02	chs-Unit 1 m1	ACCTAACCCGC	762	10	+	Hordeum vulgare	Light responsive	Light responsive elements
DcaCOL02	chs-Unit 1 m1	ACCTAACCCGG	1008	10	+	Zea mays	Light responsive	Light responsive elements
DcaCOL02	as-1	TGACG	181	5	-	Arabidopsis thaliana	cis-acting element involved in salicylic acid responsiveness	Plant hormone response elements
DcaCOL02	as-1	TGACG	825	5	+	Arabidopsis thaliana	cis-acting element involved in salicylic acid responsiveness	Plant hormone response elements
DcaCOL02	as-1	TGACG	842	5	+	Arabidopsis thaliana	cis-acting element involved in salicylic acid responsiveness	Plant hormone response elements
DcaCOL02	as-1	TGACG	901	5	+	Arabidopsis thaliana	cis-acting element involved in salicylic acid responsiveness	Plant hormone response elements
DcaCOL02	ABRE	TACGGTC	310	7	+	Arabidopsis thaliana	Abscisic acid (ABA) responsive	Plant hormone response elements
DcaCOL02	ABRE	TACGGTC	470	7	+	Arabidopsis thaliana	Abscisic acid (ABA) responsive	Plant hormone response elements
DcaCOL02	ABRE	ACGTG	889	5	+	Arabidopsis thaliana	Abscisic acid (ABA) responsive	Plant hormone response elements
DcaCOL02	ABRE	ACGTG	1244	5	-	Arabidopsis thaliana	Abscisic acid (ABA) responsive	Plant hormone response elements
DcaCOL02	ABRE	CACGTG	1626	6	-	Arabidopsis thaliana	Abscisic acid (ABA) responsive	Plant hormone response elements
DcaCOL02	ABRE	ACGTG	1627	5	+	Arabidopsis thaliana	Abscisic acid (ABA) responsive	Plant hormone response elements
DcaCOL02	ABRE	CACGTG	1873	6	-	Arabidopsis thaliana	Abscisic acid (ABA) responsive	Plant hormone response elements
DcaCOL02	ABRE	ACGTG	1874	5	+	Arabidopsis thaliana	Abscisic acid (ABA) responsive	Plant hormone response elements
DcaCOL02	GARE-motif	TCTGTTG	568	7	+	Brassica oleracea	gibberellin-responsive element	Plant hormone response elements
DcaCOL02	TGACG-motif	TGACG	181	5	-	Hordeum vulgare	cis-acting regulatory element involved in the MeJA-responsiveness	Plant hormone response elements
DcaCOL02	TGACG-motif	TGACG	825	5	+	Hordeum vulgare	cis-acting regulatory element involved in the MeJA-responsiveness	Plant hormone response elements
DcaCOL02	TGACG-motif	TGACG	842	5	+	Hordeum vulgare	cis-acting regulatory element involved in the MeJA-responsiveness	Plant hormone response elements
DcaCOL02	TGACG-motif	TGACG	901	5	+	Hordeum vulgare	cis-acting regulatory element involved in the MeJA-responsiveness	Plant hormone response elements
DcaCOL02	ABRE	CACGTA	1244	6	+	Zea mays	Abscisic acid (ABA) responsive	Plant hormone response elements
DcaCOL02	ABRE	TACGTG	1244	6	-	Zea mays	Abscisic acid (ABA) responsive	Plant hormone response elements
DcaCOL02	Sp1	GGGCGG	1616	6	-	Oryza sativa	Light responsive	Light responsive elements
DcaCOL02	CAT-box	GCCACT	1948	6	-	Arabidopsis thaliana	related to meristem specific activation	Cellular development involved elements
DcaCOL02	GCN4-motif	TGAGTCA	1582	7	-	Oryza sativa	cis-regulatory element involved in endosperm expression	Cellular development involved elements
DcaCOL02	MYB	CAACCA	95	6	+	Arabidopsis thaliana	MYB binding site involved in the drought, low temperature, salt, ABA, and GA stress responses	Biotic and abiotic stress response elements
DcaCOL02	MYB	CAACCA	449	6	+	Arabidopsis thaliana	MYB binding site involved in the drought, low temperature, salt, ABA, and GA stress responses	Biotic and abiotic stress response elements
DcaCOL02	MYB	CAACAG	569	6	-	Arabidopsis thaliana	MYB binding site involved in the drought, low temperature, salt, ABA, and GA stress responses	Biotic and abiotic stress response elements
DcaCOL02	MYB	CAACAG	1643	6	+	Arabidopsis thaliana	MYB binding site involved in the drought, low temperature, salt, ABA, and GA stress responses	Biotic and abiotic stress response elements
DcaCOL02	A-box	CCGTCC	1710	6	+	Petroselinum crispum	cis-acting regulatory element	Other elements
DcaCOL02	TGA-element	AACGAC	86	6	-	Brassica oleracea	auxin-responsive element	Plant hormone response elements
DcaCOL02	GATA-motif	GATAGGA	1866	7	-	Arabidopsis thaliana	Light responsive	Light responsive elements
DcaCOL02	W-box	TTGACC	544	6	+	Arabidopsis thaliana	responsible for inducing plant genes in response to pathogen attack	Biotic and abiotic stress response elements
DcaCOL02	W-box	TTGACC	717	6	+	Arabidopsis thaliana	responsible for inducing plant genes in response to pathogen attack	Biotic and abiotic stress response elements
DcaCOL02	W-box	TTGACC	997	6	-	Arabidopsis thaliana	responsible for inducing plant genes in response to pathogen attack	Biotic and abiotic stress response elements
DcaCOL02	W-box	TTGACC	1071	6	-	Arabidopsis thaliana	responsible for inducing plant genes in response to pathogen attack	Biotic and abiotic stress response elements
DcaCOL03	ARE	AAACCA	1268	6	-	Zea mays	cis-acting regulatory element essential for the anaerobic induction	Cellular development involved elements
DcaCOL03	TC-rich repeats	GTTTTCTTAC	1100	9	+	Nicotiana tabacum	cis-acting element involved in defense and stress responsiveness	Biotic and abiotic stress response elements
DcaCOL03	chs-CMA1a	TTACTTAA	435	8	+	Daucus carota	Light responsive	Light responsive elements
DcaCOL03	TATA-box	TATATAAA	1581	8	-	Arabidopsis thaliana	core promoter element	Other elements
DcaCOL03	TATA-box	TATATA	1598	6	-	Arabidopsis thaliana	core promoter element	Other elements
DcaCOL03	TATA-box	TATATA	1977	6	-	Arabidopsis thaliana	core promoter element	Other elements
DcaCOL03	G-box	TAACACGTAG	128	9	+	Brassica oleracea	Light responsive	Light responsive elements
DcaCOL03	MYC	CATTTG	43	6	+	Arabidopsis thaliana	MYC binding site involved in the drought, salt, and ABA stress responses	Biotic and abiotic stress response elements
DcaCOL03	MYC	CATGTG	155	6	-	Arabidopsis thaliana	MYC binding site involved in the drought, salt, and ABA stress responses	Biotic and abiotic stress response elements
DcaCOL03	MYC	CAATTG	507	6	+	Arabidopsis thaliana	MYC binding site involved in the drought, salt, and ABA stress responses	Biotic and abiotic stress response elements
DcaCOL03	TATA-box	TATAAA	331	6	-	Helianthus annuus	core promoter element	Other elements
DcaCOL03	TATA-box	TATAA	570	5	-	Arabidopsis thaliana	core promoter element	Other elements
DcaCOL03	TATA-box	TATAAA	692	6	-	Helianthus annuus	core promoter element	Other elements
DcaCOL03	TATA-box	TATA	707	4	+	Arabidopsis thaliana	core promoter element	Other elements
DcaCOL03	TATA-box	TATA	1143	4	-	Arabidopsis thaliana	core promoter element	Other elements
DcaCOL03	TATA-box	TATA	1350	4	-	Arabidopsis thaliana	core promoter element	Other elements
DcaCOL03	TATA-box	TATAAA	1406	6	-	Helianthus annuus	core promoter element	Other elements
DcaCOL03	TATA-box	ATTATA	1443	6	+	Brassica napus	core promoter element	Other elements
DcaCOL03	TATA-box	ATTATA	1538	6	+	Brassica napus	core promoter element	Other elements
DcaCOL03	TATA-box	taTATAAAtc	1579	9	-	Arabidopsis thaliana	core promoter element	Other elements
DcaCOL03	TATA-box	ATATAT	1597	6	-	Brassica napus	core promoter element	Other elements
DcaCOL03	TATA-box	TATAAATA	1621	8	-	Daucus carota	core promoter element	Other elements
DcaCOL03	TATA-box	TATAAATA	1752	8	-	Daucus carota	core promoter element	Other elements
DcaCOL03	TATA-box	TATACA	1773	6	-	Helianthus annuus	core promoter element	Other elements
DcaCOL03	TATA-box	TATAA	1893	5	-	Arabidopsis thaliana	core promoter element	Other elements
DcaCOL03	TATA-box	TATATA	1977	6	-	Arabidopsis thaliana	core promoter element	Other elements
DcaCOL03	TATA-box	TATA	1995	4	-	Arabidopsis thaliana	core promoter element	Other elements
DcaCOL03	MBS	CAACTG	58	6	-	Arabidopsis thaliana	MYB binding site involved in the drought, low temperature, salt, ABA, and GA stress responses	Biotic and abiotic stress response elements
DcaCOL03	Box-4	ATTAAT	1386	6	-	Petroselinum crispum	Light responsive	Light responsive elements
DcaCOL03	Box-4	ATTAAT	1593	6	-	Petroselinum crispum	Light responsive	Light responsive elements
DcaCOL03	Box-4	ATTAAT	1764	6	-	Petroselinum crispum	Light responsive	Light responsive elements
DcaCOL03	Box-4	ATTAAT	1794	6	-	Petroselinum crispum	Light responsive	Light responsive elements
DcaCOL03	GC-motif	CCCCCG	911	6	-	Zea mays	enhancer-like element involved in anoxic specific inducibility	Biotic and abiotic stress response elements
DcaCOL03	MSA-like	(T/C)C(T/C)AACGG(T/C)(T/C)A	511	9	-	Catharanthus roseus	cis-acting element involved in cell cycle regulation	Cellular development involved elements
DcaCOL03	CAAT-box	CAAT	31	4	+	Nicotiana glutinosa	core promoter element	Other elements
DcaCOL03	CAAT-box	CAAAT	44	5	-	Pisum sativum	core promoter element	Other elements
DcaCOL03	CAAT-box	TGCCAAC	60	7	-	Petunia hybrida	core promoter element	Other elements
DcaCOL03	CAAT-box	CAAT	180	4	-	Nicotiana glutinosa	core promoter element	Other elements
DcaCOL03	CAAT-box	CAAT	257	4	+	Nicotiana glutinosa	core promoter element	Other elements
DcaCOL03	CAAT-box	CAAAT	280	5	-	Pisum sativum	core promoter element	Other elements
DcaCOL03	CAAT-box	CAAT	372	4	-	Nicotiana glutinosa	core promoter element	Other elements
DcaCOL03	CAAT-box	CAAT	388	4	-	Nicotiana glutinosa	core promoter element	Other elements
DcaCOL03	CAAT-box	CAAAT	479	5	-	Pisum sativum	core promoter element	Other elements
DcaCOL03	CAAT-box	CAAT	491	4	+	Nicotiana glutinosa	core promoter element	Other elements
DcaCOL03	CAAT-box	CAAT	507	4	+	Nicotiana glutinosa	core promoter element	Other elements
DcaCOL03	CAAT-box	CAAT	647	4	-	Nicotiana glutinosa	core promoter element	Other elements
DcaCOL03	CAAT-box	CAAT	688	4	-	Nicotiana glutinosa	core promoter element	Other elements
DcaCOL03	CAAT-box	CAAT	731	4	-	Nicotiana glutinosa	core promoter element	Other elements
DcaCOL03	CAAT-box	CAAT	796	4	-	Nicotiana glutinosa	core promoter element	Other elements
DcaCOL03	CAAT-box	CAAT	819	4	-	Nicotiana glutinosa	core promoter element	Other elements
DcaCOL03	CAAT-box	CAAAT	841	5	+	Pisum sativum	core promoter element	Other elements
DcaCOL03	CAAT-box	CCAAT	866	5	-	Arabidopsis thaliana	core promoter element	Other elements
DcaCOL03	CAAT-box	CAAAT	898	5	+	Pisum sativum	core promoter element	Other elements
DcaCOL03	CAAT-box	CCAAT	960	5	+	Arabidopsis thaliana	core promoter element	Other elements
DcaCOL03	CAAT-box	CAAT	1059	4	-	Nicotiana glutinosa	core promoter element	Other elements
DcaCOL03	CAAT-box	CAAAT	1081	5	+	Pisum sativum	core promoter element	Other elements
DcaCOL03	CAAT-box	CAAT	1086	4	+	Nicotiana glutinosa	core promoter element	Other elements
DcaCOL03	CAAT-box	CAAT	1097	4	-	Nicotiana glutinosa	core promoter element	Other elements
DcaCOL03	CAAT-box	CAAAT	1181	5	-	Pisum sativum	core promoter element	Other elements
DcaCOL03	CAAT-box	CAAAT	1192	5	+	Pisum sativum	core promoter element	Other elements
DcaCOL03	CAAT-box	CCAAT	1213	5	+	Arabidopsis thaliana	core promoter element	Other elements
DcaCOL03	CAAT-box	CAAT	1252	4	-	Nicotiana glutinosa	core promoter element	Other elements
DcaCOL03	CAAT-box	CCAAT	1288	5	-	Arabidopsis thaliana	core promoter element	Other elements
DcaCOL03	CAAT-box	CCAAT	1305	5	-	Arabidopsis thaliana	core promoter element	Other elements
DcaCOL03	CAAT-box	CAAT	1358	4	+	Nicotiana glutinosa	core promoter element	Other elements
DcaCOL03	CAAT-box	CAAT	1396	4	+	Nicotiana glutinosa	core promoter element	Other elements
DcaCOL03	CAAT-box	CAAAT	1488	5	+	Pisum sativum	core promoter element	Other elements
DcaCOL03	CAAT-box	CAAT	1494	4	-	Nicotiana glutinosa	core promoter element	Other elements
DcaCOL03	CAAT-box	CAAT	1709	4	+	Nicotiana glutinosa	core promoter element	Other elements
DcaCOL03	CAAT-box	CAAT	1807	4	+	Nicotiana glutinosa	core promoter element	Other elements
DcaCOL03	CAAT-box	CAAT	1821	4	+	Nicotiana glutinosa	core promoter element	Other elements
DcaCOL03	CAAT-box	CAAT	1840	4	-	Nicotiana glutinosa	core promoter element	Other elements
DcaCOL03	WRE3	CCACCT	976	6	-	Pisum sativum	wound-responsive elements	Biotic and abiotic stress response elements
DcaCOL03	WRE3	CCACCT	983	6	-	Pisum sativum	wound-responsive elements	Biotic and abiotic stress response elements
DcaCOL03	WRE3	CCACCT	1064	6	+	Pisum sativum	wound-responsive elements	Biotic and abiotic stress response elements
DcaCOL03	WRE3	CCACCT	1972	6	+	Pisum sativum	wound-responsive elements	Biotic and abiotic stress response elements
DcaCOL03	TCT-motif	TCTTAC	1659	6	-	Arabidopsis thaliana	Light responsive	Light responsive elements
DcaCOL03	ERE	ATTTTAAA	886	8	-	Nicotiana glutinos	estrogen responsive element (ERE)	Plant hormone response elements
DcaCOL03	GA-motif	ATAGATAA	665	8	-	Arabidopsis thaliana	Light responsive	Light responsive elements
DcaCOL03	CCAAT-box	CAACGG	514	6	-	Hordeum vulgare	MYBHv1 binding site	Other elements
DcaCOL03	AuxRR-core	GGTCCAT	1923	7	+	Nicotiana tabacum	cis-acting regulatory element involved in auxin responsiveness	Plant hormone response elements
DcaCOL03	WUN-motif	TTATTACAT	1729	9	+	Nicotiana glutinosa	wound-responsive element	Biotic and abiotic stress response elements
DcaCOL03	TGA-element	AACGAC	1223	6	-	Brassica oleracea	auxin-responsive element	Plant hormone response elements
DcaCOL03	AAGAA-motif	GAAAGAA	1103	7	-	Avena sativa	Abscisic acid (ABA) responsive	Plant hormone response elements
DcaCOL03	AAGAA-motif	GAAAGAA	1115	7	+	Avena sativa	Abscisic acid (ABA) responsive	Plant hormone response elements
DcaCOL03	AAGAA-motif	GAAAGAA	1206	7	-	Avena sativa	Abscisic acid (ABA) responsive	Plant hormone response elements
DcaCOL03	CAT-box	GCCACT	550	6	-	Arabidopsis thaliana	related to meristem specific activation	Cellular development involved elements
DcaCOL03	MYB	TAACCA	300	6	-	Arabidopsis thaliana	MYB binding site involved in the drought, low temperature, salt, ABA, and GA stress responses	Biotic and abiotic stress response elements
DcaCOL03	MYB	CAACCA	404	6	-	Arabidopsis thaliana	MYB binding site involved in the drought, low temperature, salt, ABA, and GA stress responses	Biotic and abiotic stress response elements
DcaCOL03	MYB	TAACCA	1217	6	-	Arabidopsis thaliana	MYB binding site involved in the drought, low temperature, salt, ABA, and GA stress responses	Biotic and abiotic stress response elements
DcaCOL03	MYB	TAACCA	1290	6	-	Arabidopsis thaliana	MYB binding site involved in the drought, low temperature, salt, ABA, and GA stress responses	Biotic and abiotic stress response elements
DcaCOL03	MYB	CAACCA	1961	6	+	Arabidopsis thaliana	MYB binding site involved in the drought, low temperature, salt, ABA, and GA stress responses	Biotic and abiotic stress response elements
DcaCOL03	MYB	CCGTTG	514	6	+	Arabidopsis thaliana	MYB binding site involved in the drought, low temperature, salt, ABA, and GA stress responses	Biotic and abiotic stress response elements
DcaCOL03	W-box	TTGACC	1060	6	+	Arabidopsis thaliana	responsible for inducing plant genes in response to pathogen attack	Biotic and abiotic stress response elements
DcaCOL03	MYB	TAACCA	300	6	-	Arabidopsis thaliana	MYB binding site involved in the drought, low temperature, salt, ABA, and GA stress responses	Biotic and abiotic stress response elements
DcaCOL03	MYB	TAACCA	1217	6	-	Arabidopsis thaliana	MYB binding site involved in the drought, low temperature, salt, ABA, and GA stress responses	Biotic and abiotic stress response elements
DcaCOL03	MYB	TAACCA	1290	6	-	Arabidopsis thaliana	MYB binding site involved in the drought, low temperature, salt, ABA, and GA stress responses	Biotic and abiotic stress response elements
DcaCOL03	MYB	CAACTG	58	6	-	Arabidopsis thaliana	MYB binding site involved in the drought, low temperature, salt, ABA, and GA stress responses	Biotic and abiotic stress response elements
DcaCOL03	O2-site	GATGA(C/T)(A/G)TG(A/G)	1042	8	+	Zea mays	cis-acting regulatory element involved in zein metabolism regulation	Cellular development involved elements
DcaCOL03	GATA-motif	AAGATAAGATT	356	10	+	Arabidopsis thaliana	Light responsive	Light responsive elements
DcaCOL03	GATA-motif	AAGATAAGATT	1543	10	-	Arabidopsis thaliana	Light responsive	Light responsive elements
DcaCOL03	chs-CMA2a	TCACTTGA	940	8	+	Petroselinum crispum	Light responsive	Light responsive elements
DcaCOL04	CAT-box	GCCACT	855	6	-	Arabidopsis thaliana	related to meristem specific activation	Cellular development involved elements
DcaCOL04	AAGAA-motif	GAAAGAA	964	7	-	Avena sativa	Abscisic acid (ABA) responsive	Plant hormone response elements
DcaCOL04	GCN4-motif	TGAGTCA	130	7	-	Oryza sativa	cis-regulatory element involved in endosperm expression	Cellular development involved elements
DcaCOL04	MYB	CAACCA	161	6	-	Arabidopsis thaliana	MYB binding site involved in the drought, low temperature, salt, ABA, and GA stress responses	Biotic and abiotic stress response elements
DcaCOL04	MYB	CAACCA	286	6	-	Arabidopsis thaliana	MYB binding site involved in the drought, low temperature, salt, ABA, and GA stress responses	Biotic and abiotic stress response elements
DcaCOL04	MYB	CAACCA	319	6	-	Arabidopsis thaliana	MYB binding site involved in the drought, low temperature, salt, ABA, and GA stress responses	Biotic and abiotic stress response elements
DcaCOL04	MYB	CAACAG	1660	6	+	Arabidopsis thaliana	MYB binding site involved in the drought, low temperature, salt, ABA, and GA stress responses	Biotic and abiotic stress response elements
DcaCOL04	MYB	TAACCA	1728	6	-	Arabidopsis thaliana	MYB binding site involved in the drought, low temperature, salt, ABA, and GA stress responses	Biotic and abiotic stress response elements
DcaCOL04	GT1-motif	GGTTAA	1729	6	+	Arabidopsis thaliana	Light responsive	Light responsive elements
DcaCOL04	P-box	CCTTTTG	921	7	+	Oryza sativa	gibberellin responsive	Plant hormone response elements
DcaCOL04	TATC-box	TATCCCA	329	7	-	Oryza sativa	gibberellin responsive	Plant hormone response elements
DcaCOL04	TATC-box	TATCCCA	1044	7	-	Oryza sativa	gibberellin responsive	Plant hormone response elements
DcaCOL04	TATC-box	TATCCCA	1500	7	+	Oryza sativa	gibberellin responsive	Plant hormone response elements
DcaCOL04	TATC-box	TATCCCA	1859	7	+	Oryza sativa	gibberellin responsive	Plant hormone response elements
DcaCOL04	LTR	CCGAAA	1290	6	-	Hordeum vulgare	cis-acting element involved in low-temperature responsiveness	Biotic and abiotic stress response elements
DcaCOL04	LTR	CCGAAA	1454	6	-	Hordeum vulgare	cis-acting element involved in low-temperature responsiveness	Biotic and abiotic stress response elements
DcaCOL04	STRE	AGGGG	635	5	-	Arabidopsis thaliana	stress response element (STRE)	Biotic and abiotic stress response elements
DcaCOL04	STRE	AGGGG	835	5	-	Arabidopsis thaliana	stress response element (STRE)	Biotic and abiotic stress response elements
DcaCOL04	STRE	AGGGG	870	5	+	Arabidopsis thaliana	stress response element (STRE)	Biotic and abiotic stress response elements
DcaCOL04	MYB	CCGTTG	152	6	-	Arabidopsis thaliana	MYB binding site involved in the drought, low temperature, salt, ABA, and GA stress responses	Biotic and abiotic stress response elements
DcaCOL04	MYB	CCGTTG	195	6	-	Arabidopsis thaliana	MYB binding site involved in the drought, low temperature, salt, ABA, and GA stress responses	Biotic and abiotic stress response elements
DcaCOL04	MYB	TAACCA	1728	6	-	Arabidopsis thaliana	MYB binding site involved in the drought, low temperature, salt, ABA, and GA stress responses	Biotic and abiotic stress response elements
DcaCOL04	MYB	CAACTG	171	6	-	Arabidopsis thaliana	MYB binding site involved in the drought, low temperature, salt, ABA, and GA stress responses	Biotic and abiotic stress response elements
DcaCOL04	MYB	CAACTG	629	6	+	Arabidopsis thaliana	MYB binding site involved in the drought, low temperature, salt, ABA, and GA stress responses	Biotic and abiotic stress response elements
DcaCOL04	MYB	TAACTG	848	6	+	Arabidopsis thaliana	MYB binding site involved in the drought, low temperature, salt, ABA, and GA stress responses	Biotic and abiotic stress response elements
DcaCOL04	G-Box	CACGTT	603	6	+	Pisum sativum	Light responsive	Light responsive elements
DcaCOL04	TATA-box	TATA	406	4	+	Arabidopsis thaliana	core promoter element	Other elements
DcaCOL04	TATA-box	TATAAAT	462	7	-	Brassica juncea	core promoter element	Other elements
DcaCOL04	TATA-box	ATATAA	500	6	+	Brassica oleracea	core promoter element	Other elements
DcaCOL04	TATA-box	ATTATA	507	6	+	Brassica napus	core promoter element	Other elements
DcaCOL04	TATA-box	TATACA	541	6	-	Helianthus annuus	core promoter element	Other elements
DcaCOL04	TATA-box	ccTATAAAaa	977	9	+	Arabidopsis thaliana	core promoter element	Other elements
DcaCOL04	TATA-box	TATAAATA	1049	8	-	Daucus carota	core promoter element	Other elements
DcaCOL04	AE-box	AGAAACAA	804	8	-	Arabidopsis thaliana	Light responsive	Light responsive elements
DcaCOL04	MYC	CATTTG	118	6	+	Arabidopsis thaliana	MYC binding site involved in the drought, salt, and ABA stress responses	Biotic and abiotic stress response elements
DcaCOL04	MYC	CATGTG	1070	6	+	Arabidopsis thaliana	MYC binding site involved in the drought, salt, and ABA stress responses	Biotic and abiotic stress response elements
DcaCOL04	TATA-box	TATAAAAT	501	8	+	Arabidopsis thaliana	core promoter element around -30 of transcription start	Other elements
DcaCOL04	MBS	CAACTG	171	6	-	Arabidopsis thaliana	MYB binding site involved in the drought, low temperature, salt, ABA, and GA stress responses	Biotic and abiotic stress response elements
DcaCOL04	MBS	CAACTG	629	6	+	Arabidopsis thaliana	MYB binding site involved in the drought, low temperature, salt, ABA, and GA stress responses	Biotic and abiotic stress response elements
DcaCOL04	Myc	TCTCTTA	1215	7	-	Arabidopsis thaliana	MYC binding site involved in the drought, salt, and ABA stress responses	Biotic and abiotic stress response elements
DcaCOL04	Box-4	ATTAAT	363	6	+	Petroselinum crispum	Light responsive	Light responsive elements
DcaCOL04	CGTCA-motif	CGTCA	277	5	-	Hordeum vulgare	cis-acting regulatory element involved in the MeJA-responsiveness	Plant hormone response elements
DcaCOL04	CGTCA-motif	CGTCA	598	5	-	Hordeum vulgare	cis-acting regulatory element involved in the MeJA-responsiveness	Plant hormone response elements
DcaCOL04	MRE	AACCTAA	336	7	+	Petroselinum crispum	MYB binding site involved in light responsiveness	Light responsive elements
DcaCOL04	MYB	CAACAG	1660	6	+	Nicotiana tabacum	MYB binding site involved in the drought, low temperature, salt, ABA, and GA stress responses	Biotic and abiotic stress response elements
DcaCOL04	box-S	AGCCACC	907	7	+	Arabidopsis thaliana	Light responsive	Light responsive elements
DcaCOL04	GA-motif	ATAGATAA	1984	8	-	Arabidopsis thaliana	Light responsive	Light responsive elements
DcaCOL04	CCAAT-box	CAACGG	152	6	+	Hordeum vulgare	MYBHv1 binding site	Other elements
DcaCOL04	CCAAT-box	CAACGG	195	6	+	Hordeum vulgare	MYBHv1 binding site	Other elements
DcaCOL04	WUN-motif	AAATTACT	1530	8	-	Nicotiana glutinosa	wound-responsive element	Biotic and abiotic stress response elements
DcaCOL04	as-1	TGACG	277	5	+	Arabidopsis thaliana	cis-acting element involved in salicylic acid responsiveness	Plant hormone response elements
DcaCOL04	as-1	TGACG	598	5	+	Arabidopsis thaliana	cis-acting element involved in salicylic acid responsiveness	Plant hormone response elements
DcaCOL04	ABRE	ACGTG	603	5	-	Arabidopsis thaliana	Abscisic acid (ABA) responsive	Plant hormone response elements
DcaCOL04	CAAT-box	CAAT	51	4	+	Nicotiana glutinosa	core promoter element	Other elements
DcaCOL04	CAAT-box	CAAAT	119	5	-	Pisum sativum	core promoter element	Other elements
DcaCOL04	CAAT-box	CAAT	217	4	-	Nicotiana glutinosa	core promoter element	Other elements
DcaCOL04	CAAT-box	CAAT	243	4	-	Nicotiana glutinosa	core promoter element	Other elements
DcaCOL04	CAAT-box	CAAT	254	4	+	Nicotiana glutinosa	core promoter element	Other elements
DcaCOL04	CAAT-box	CCAAT	273	5	+	Arabidopsis thaliana	core promoter element	Other elements
DcaCOL04	CAAT-box	CAAT	292	4	+	Nicotiana glutinosa	core promoter element	Other elements
DcaCOL04	CAAT-box	CCAAT	317	5	-	Arabidopsis thaliana	core promoter element	Other elements
DcaCOL04	CAAT-box	CAAAT	350	5	+	Pisum sativum	core promoter element	Other elements
DcaCOL04	CAAT-box	CAAT	384	4	+	Nicotiana glutinosa	core promoter element	Other elements
DcaCOL04	CAAT-box	CAAT	431	4	+	Nicotiana glutinosa	core promoter element	Other elements
DcaCOL04	CAAT-box	CCAAT	665	5	-	Arabidopsis thaliana	core promoter element	Other elements
DcaCOL04	CAAT-box	CAAAT	736	5	+	Pisum sativum	core promoter element	Other elements
DcaCOL04	CAAT-box	CAAT	745	4	+	Nicotiana glutinosa	core promoter element	Other elements
DcaCOL04	CAAT-box	CCAAT	812	5	+	Arabidopsis thaliana	core promoter element	Other elements
DcaCOL04	CAAT-box	CAAAT	942	5	-	Pisum sativum	core promoter element	Other elements
DcaCOL04	CAAT-box	CAAAT	1026	5	-	Pisum sativum	core promoter element	Other elements
DcaCOL04	CAAT-box	CAAT	1302	4	+	Nicotiana glutinosa	core promoter element	Other elements
DcaCOL04	CAAT-box	CAAT	1317	4	-	Nicotiana glutinosa	core promoter element	Other elements
DcaCOL04	CAAT-box	CAAT	1337	4	-	Nicotiana glutinosa	core promoter element	Other elements
DcaCOL04	CAAT-box	CAAT	1484	4	-	Nicotiana glutinosa	core promoter element	Other elements
DcaCOL04	CAAT-box	CAAAT	1534	5	-	Pisum sativum	core promoter element	Other elements
DcaCOL04	CAAT-box	CAAT	1605	4	-	Nicotiana glutinosa	core promoter element	Other elements
DcaCOL04	CAAT-box	CAAAT	1648	5	+	Pisum sativum	core promoter element	Other elements
DcaCOL04	CAAT-box	CCAAT	1761	5	-	Arabidopsis thaliana	core promoter element	Other elements
DcaCOL04	CAAT-box	CAAAT	1852	5	-	Pisum sativum	core promoter element	Other elements
DcaCOL04	CAAT-box	CAAT	1990	4	-	Nicotiana glutinosa	core promoter element	Other elements
DcaCOL04	TGACG-motif	TGACG	277	5	+	Hordeum vulgare	cis-acting regulatory element involved in the MeJA-responsiveness	Plant hormone response elements
DcaCOL04	TGACG-motif	TGACG	598	5	+	Hordeum vulgare	cis-acting regulatory element involved in the MeJA-responsiveness	Plant hormone response elements
DcaCOL04	WRE3	CCACCT	267	6	-	Pisum sativum	wound-responsive elements	Biotic and abiotic stress response elements
DcaCOL04	Sp1	GGGCGG	1271	6	-	Oryza sativa	Light responsive	Light responsive elements
DcaCOL05	MYB	TAACCA	446	6	-	Arabidopsis thaliana	MYB binding site involved in the drought, low temperature, salt, ABA, and GA stress responses	Biotic and abiotic stress response elements
DcaCOL05	MYB	TAACCA	556	6	+	Arabidopsis thaliana	MYB binding site involved in the drought, low temperature, salt, ABA, and GA stress responses	Biotic and abiotic stress response elements
DcaCOL05	MYB	CAACCA	560	6	+	Arabidopsis thaliana	MYB binding site involved in the drought, low temperature, salt, ABA, and GA stress responses	Biotic and abiotic stress response elements
DcaCOL05	MYB	CAACCA	664	6	+	Arabidopsis thaliana	MYB binding site involved in the drought, low temperature, salt, ABA, and GA stress responses	Biotic and abiotic stress response elements
DcaCOL05	MYB	TAACCA	1300	6	-	Arabidopsis thaliana	MYB binding site involved in the drought, low temperature, salt, ABA, and GA stress responses	Biotic and abiotic stress response elements
DcaCOL05	GT1-motif	GGTTAA	447	6	+	Arabidopsis thaliana	Light responsive	Light responsive elements
DcaCOL05	GT1-motif	GGTTAAT	554	7	-	Avena sativa	Light responsive	Light responsive elements
DcaCOL05	GT1-motif	GGTTAA	555	6	-	Arabidopsis thaliana	Light responsive	Light responsive elements
DcaCOL05	GT1-motif	GGTTAA	1507	6	+	Arabidopsis thaliana	Light responsive	Light responsive elements
DcaCOL05	CAT-box	GCCACT	241	6	-	Arabidopsis thaliana	related to meristem specific activation	Cellular development involved elements
DcaCOL05	MBSI	TTTTTACGGTTA	1371	11	-	Petunia hybrida	MYB binding site involved in flavonoid biosynthetic genes regulation	Cellular development involved elements
DcaCOL05	circadian	CAAAGATATC	106	9	-	Lycopersicon esculentum	cis-acting regulatory element involved in circadian control	Cellular development involved elements
DcaCOL05	TGA-element	AACGAC	1826	6	+	Brassica oleracea	auxin-responsive element	Plant hormone response elements
DcaCOL05	P-box	CCTTTTG	739	7	+	Oryza sativa	gibberellin responsive	Plant hormone response elements
DcaCOL05	MYB	TAACTG	301	6	-	Arabidopsis thaliana	MYB binding site involved in the drought, low temperature, salt, ABA, and GA stress responses	Biotic and abiotic stress response elements
DcaCOL05	MYB	TAACTG	382	6	+	Arabidopsis thaliana	MYB binding site involved in the drought, low temperature, salt, ABA, and GA stress responses	Biotic and abiotic stress response elements
DcaCOL05	MYB	CAACTG	535	6	+	Arabidopsis thaliana	MYB binding site involved in the drought, low temperature, salt, ABA, and GA stress responses	Biotic and abiotic stress response elements
DcaCOL05	MYB	TAACCA	446	6	-	Arabidopsis thaliana	MYB binding site involved in the drought, low temperature, salt, ABA, and GA stress responses	Biotic and abiotic stress response elements
DcaCOL05	MYB	TAACCA	556	6	+	Arabidopsis thaliana	MYB binding site involved in the drought, low temperature, salt, ABA, and GA stress responses	Biotic and abiotic stress response elements
DcaCOL05	MYB	TAACCA	1300	6	-	Arabidopsis thaliana	MYB binding site involved in the drought, low temperature, salt, ABA, and GA stress responses	Biotic and abiotic stress response elements
DcaCOL05	W-box	TTGACC	841	6	-	Arabidopsis thaliana	responsible for inducing plant genes in response to pathogen attack	Biotic and abiotic stress response elements
DcaCOL05	GATA-motif	GATAGGA	1683	7	+	Arabidopsis thaliana	Light responsive	Light responsive elements
DcaCOL05	STRE	AGGGG	1972	5	-	Arabidopsis thaliana	stress response element (STRE)	Biotic and abiotic stress response elements
DcaCOL05	STRE	AGGGG	1977	5	-	Arabidopsis thaliana	stress response element (STRE)	Biotic and abiotic stress response elements
DcaCOL05	STRE	AGGGG	1995	5	-	Arabidopsis thaliana	stress response element (STRE)	Biotic and abiotic stress response elements
DcaCOL05	Box-4	ATTAAT	1424	6	-	Petroselinum crispum	Light responsive	Light responsive elements
DcaCOL05	Box-4	ATTAAT	1538	6	-	Petroselinum crispum	Light responsive	Light responsive elements
DcaCOL05	Box-4	ATTAAT	1563	6	-	Petroselinum crispum	Light responsive	Light responsive elements
DcaCOL05	Box-4	ATTAAT	1657	6	-	Petroselinum crispum	Light responsive	Light responsive elements
DcaCOL05	Box-4	ATTAAT	1989	6	-	Petroselinum crispum	Light responsive	Light responsive elements
DcaCOL05	TATA-box	TATAAAAT	785	8	-	Arabidopsis thaliana	core promoter element around -30 of transcription start	Other elements
DcaCOL05	MBS	CAACTG	535	6	+	Arabidopsis thaliana	MYB binding site involved in the drought, low temperature, salt, ABA, and GA stress responses	Biotic and abiotic stress response elements
DcaCOL05	MYC	CATTTG	467	6	-	Arabidopsis thaliana	MYC binding site involved in the drought, salt, and ABA stress responses	Biotic and abiotic stress response elements
DcaCOL05	MYC	CATTTG	768	6	-	Arabidopsis thaliana	MYC binding site involved in the drought, salt, and ABA stress responses	Biotic and abiotic stress response elements
DcaCOL05	MYC	CATTTG	1210	6	-	Arabidopsis thaliana	MYC binding site involved in the drought, salt, and ABA stress responses	Biotic and abiotic stress response elements
DcaCOL05	MYC	CATTTG	1361	6	-	Arabidopsis thaliana	MYC binding site involved in the drought, salt, and ABA stress responses	Biotic and abiotic stress response elements
DcaCOL05	MYC	CATTTG	1790	6	-	Arabidopsis thaliana	MYC binding site involved in the drought, salt, and ABA stress responses	Biotic and abiotic stress response elements
DcaCOL05	G-box	CACGTC	1111	6	-	Zea mays	Light responsive	Light responsive elements
DcaCOL05	TATA-box	TATATAAA	787	8	-	Arabidopsis thaliana	core promoter element	Other elements
DcaCOL05	TATA-box	TATATA	1531	6	-	Arabidopsis thaliana	core promoter element	Other elements
DcaCOL05	TATA-box	TATATAAA	1589	8	-	Arabidopsis thaliana	core promoter element	Other elements
DcaCOL05	TATA-box	ATATAT	107	6	+	Brassica napus	core promoter element	Other elements
DcaCOL05	TATA-box	TATA	183	4	+	Arabidopsis thaliana	core promoter element	Other elements
DcaCOL05	TATA-box	TATAA	227	5	-	Arabidopsis thaliana	core promoter element	Other elements
DcaCOL05	TATA-box	ATTATA	341	6	+	Brassica napus	core promoter element	Other elements
DcaCOL05	TATA-box	TATAAAT	405	7	-	Brassica juncea	core promoter element	Other elements
DcaCOL05	TATA-box	TACAAAA	741	7	-	Oryza sativa	core promoter element	Other elements
DcaCOL05	TATA-box	TATAAAA	786	7	-	Pisum sativum	core promoter element	Other elements
DcaCOL05	TATA-box	TATAAAT	1123	7	-	Brassica juncea	core promoter element	Other elements
DcaCOL05	TATA-box	TATA	1178	4	-	Arabidopsis thaliana	core promoter element	Other elements
DcaCOL05	TATA-box	TATA	1193	4	-	Arabidopsis thaliana	core promoter element	Other elements
DcaCOL05	TATA-box	TATA	1268	4	-	Arabidopsis thaliana	core promoter element	Other elements
DcaCOL05	TATA-box	TATTTAAA	1458	8	-	Arabidopsis thaliana	core promoter element	Other elements
DcaCOL05	TATA-box	ATATAT	1530	6	-	Brassica napus	core promoter element	Other elements
DcaCOL05	TATA-box	taTATAAAtc	1587	9	-	Arabidopsis thaliana	core promoter element	Other elements
DcaCOL05	TATA-box	ATTATA	1626	6	+	Brassica napus	core promoter element	Other elements
DcaCOL05	TATA-box	TATA	1640	4	-	Arabidopsis thaliana	core promoter element	Other elements
DcaCOL05	chs-CMA1a	TTACTTAA	49	8	+	Daucus carota	Light responsive	Light responsive elements
DcaCOL05	MRE	AACCTAA	1504	7	-	Petroselinum crispum	MYB binding site involved in light responsiveness	Light responsive elements
DcaCOL05	CGTCA-motif	CGTCA	568	5	+	Hordeum vulgare	cis-acting regulatory element involved in the MeJA-responsiveness	Plant hormone response elements
DcaCOL05	CGTCA-motif	CGTCA	1110	5	-	Hordeum vulgare	cis-acting regulatory element involved in the MeJA-responsiveness	Plant hormone response elements
DcaCOL05	ARE	AAACCA	549	6	+	Zea mays	cis-acting regulatory element essential for the anaerobic induction	Cellular development involved elements
DcaCOL05	ARE	AAACCA	1472	6	+	Zea mays	cis-acting regulatory element essential for the anaerobic induction	Cellular development involved elements
DcaCOL05	TCA	TCATCTTCAT	91	9	+	Pisum sativum	cis-acting element involved in salicylic acid responsiveness	Plant hormone response elements
DcaCOL05	as-1	TGACG	568	5	-	Arabidopsis thaliana	cis-acting element involved in salicylic acid responsiveness	Plant hormone response elements
DcaCOL05	as-1	TGACG	1110	5	+	Arabidopsis thaliana	cis-acting element involved in salicylic acid responsiveness	Plant hormone response elements
DcaCOL05	GA-motif	ATAGATAA	373	8	-	Arabidopsis thaliana	Light responsive	Light responsive elements
DcaCOL05	WRE3	CCACCT	639	6	+	Pisum sativum	wound-responsive elements	Biotic and abiotic stress response elements
DcaCOL05	WRE3	CCACCT	883	6	+	Pisum sativum	wound-responsive elements	Biotic and abiotic stress response elements
DcaCOL05	WRE3	CCACCT	1725	6	+	Pisum sativum	wound-responsive elements	Biotic and abiotic stress response elements
DcaCOL05	TGACG-motif	TGACG	568	5	-	Hordeum vulgare	cis-acting regulatory element involved in the MeJA-responsiveness	Plant hormone response elements
DcaCOL05	TGACG-motif	TGACG	1110	5	+	Hordeum vulgare	cis-acting regulatory element involved in the MeJA-responsiveness	Plant hormone response elements
DcaCOL05	ABRE	ACGTG	1112	5	+	Arabidopsis thaliana	Abscisic acid (ABA) responsive	Plant hormone response elements
DcaCOL05	CAAT-box	CAAT	28	4	+	Nicotiana glutinosa	core promoter element	Other elements
DcaCOL05	CAAT-box	CAAT	38	4	-	Nicotiana glutinosa	core promoter element	Other elements
DcaCOL05	CAAT-box	CAAAT	111	5	-	Pisum sativum	core promoter element	Other elements
DcaCOL05	CAAT-box	CCAAT	117	5	-	Arabidopsis thaliana	core promoter element	Other elements
DcaCOL05	CAAT-box	CAAT	158	4	+	Nicotiana glutinosa	core promoter element	Other elements
DcaCOL05	CAAT-box	CAAAT	216	5	-	Pisum sativum	core promoter element	Other elements
DcaCOL05	CAAT-box	CAAT	290	4	+	Nicotiana glutinosa	core promoter element	Other elements
DcaCOL05	CAAT-box	CAAAT	467	5	+	Pisum sativum	core promoter element	Other elements
DcaCOL05	CAAT-box	CCAAT	518	5	-	Arabidopsis thaliana	core promoter element	Other elements
DcaCOL05	CAAT-box	CAAT	543	4	-	Nicotiana glutinosa	core promoter element	Other elements
DcaCOL05	CAAT-box	CCAAT	563	5	+	Arabidopsis thaliana	core promoter element	Other elements
DcaCOL05	CAAT-box	CAAT	572	4	-	Nicotiana glutinosa	core promoter element	Other elements
DcaCOL05	CAAT-box	CAAT	595	4	+	Nicotiana glutinosa	core promoter element	Other elements
DcaCOL05	CAAT-box	CAAT	670	4	+	Nicotiana glutinosa	core promoter element	Other elements
DcaCOL05	CAAT-box	CAAT	727	4	+	Nicotiana glutinosa	core promoter element	Other elements
DcaCOL05	CAAT-box	CCAAT	759	5	+	Arabidopsis thaliana	core promoter element	Other elements
DcaCOL05	CAAT-box	CAAAT	768	5	+	Pisum sativum	core promoter element	Other elements
DcaCOL05	CAAT-box	CAAAT	802	5	+	Pisum sativum	core promoter element	Other elements
DcaCOL05	CAAT-box	CCAAT	838	5	-	Arabidopsis thaliana	core promoter element	Other elements
DcaCOL05	CAAT-box	CAAT	844	4	+	Nicotiana glutinosa	core promoter element	Other elements
DcaCOL05	CAAT-box	CAAAT	954	5	-	Pisum sativum	core promoter element	Other elements
DcaCOL05	CAAT-box	CAAT	1005	4	-	Nicotiana glutinosa	core promoter element	Other elements
DcaCOL05	CAAT-box	CAAT	1037	4	-	Nicotiana glutinosa	core promoter element	Other elements
DcaCOL05	CAAT-box	CAAT	1117	4	+	Nicotiana glutinosa	core promoter element	Other elements
DcaCOL05	CAAT-box	CAAT	1141	4	-	Nicotiana glutinosa	core promoter element	Other elements
DcaCOL05	CAAT-box	CAAAT	1210	5	+	Pisum sativum	core promoter element	Other elements
DcaCOL05	CAAT-box	CAAAT	1237	5	-	Pisum sativum	core promoter element	Other elements
DcaCOL05	CAAT-box	CAAAT	1297	5	-	Pisum sativum	core promoter element	Other elements
DcaCOL05	CAAT-box	CAAAT	1318	5	+	Pisum sativum	core promoter element	Other elements
DcaCOL05	CAAT-box	CAAAT	1361	5	+	Pisum sativum	core promoter element	Other elements
DcaCOL05	CAAT-box	CAAT	1367	4	-	Nicotiana glutinosa	core promoter element	Other elements
DcaCOL05	CAAT-box	CAAT	1413	4	+	Nicotiana glutinosa	core promoter element	Other elements
DcaCOL05	CAAT-box	CCAAT	1431	5	-	Arabidopsis thaliana	core promoter element	Other elements
DcaCOL05	CAAT-box	CAAT	1438	4	+	Nicotiana glutinosa	core promoter element	Other elements
DcaCOL05	CAAT-box	CAAT	1452	4	+	Nicotiana glutinosa	core promoter element	Other elements
DcaCOL05	CAAT-box	CCAAT	1475	5	+	Arabidopsis thaliana	core promoter element	Other elements
DcaCOL05	CAAT-box	CAAAT	1567	5	-	Pisum sativum	core promoter element	Other elements
DcaCOL05	CAAT-box	CAAT	1755	4	-	Nicotiana glutinosa	core promoter element	Other elements
DcaCOL05	CAAT-box	CAAAT	1790	5	+	Pisum sativum	core promoter element	Other elements
DcaCOL05	CAAT-box	CAAT	1822	4	+	Nicotiana glutinosa	core promoter element	Other elements
DcaCOL05	CAAT-box	CCAAT	1872	5	+	Arabidopsis thaliana	core promoter element	Other elements
DcaCOL05	CAAT-box	CCAAT	1914	5	+	Arabidopsis thaliana	core promoter element	Other elements
DcaCOL06	GCN4-motif	TGAGTCA	130	7	-	Oryza sativa	cis-regulatory element involved in endosperm expression	Cellular development involved elements
DcaCOL06	AAGAA-motif	GAAAGAA	964	7	-	Avena sativa	Abscisic acid (ABA) responsive	Plant hormone response elements
DcaCOL06	CAT-box	GCCACT	855	6	-	Arabidopsis thaliana	related to meristem specific activation	Cellular development involved elements
DcaCOL06	GT1-motif	GGTTAA	1729	6	+	Arabidopsis thaliana	Light responsive	Light responsive elements
DcaCOL06	MYB	CAACCA	161	6	-	Arabidopsis thaliana	MYB binding site involved in the drought, low temperature, salt, ABA, and GA stress responses	Biotic and abiotic stress response elements
DcaCOL06	MYB	CAACCA	286	6	-	Arabidopsis thaliana	MYB binding site involved in the drought, low temperature, salt, ABA, and GA stress responses	Biotic and abiotic stress response elements
DcaCOL06	MYB	CAACCA	319	6	-	Arabidopsis thaliana	MYB binding site involved in the drought, low temperature, salt, ABA, and GA stress responses	Biotic and abiotic stress response elements
DcaCOL06	MYB	CAACAG	1660	6	+	Arabidopsis thaliana	MYB binding site involved in the drought, low temperature, salt, ABA, and GA stress responses	Biotic and abiotic stress response elements
DcaCOL06	MYB	TAACCA	1728	6	-	Arabidopsis thaliana	MYB binding site involved in the drought, low temperature, salt, ABA, and GA stress responses	Biotic and abiotic stress response elements
DcaCOL06	LTR	CCGAAA	1290	6	-	Hordeum vulgare	cis-acting element involved in low-temperature responsiveness	Biotic and abiotic stress response elements
DcaCOL06	LTR	CCGAAA	1454	6	-	Hordeum vulgare	cis-acting element involved in low-temperature responsiveness	Biotic and abiotic stress response elements
DcaCOL06	TATC-box	TATCCCA	329	7	-	Oryza sativa	gibberellin responsive	Plant hormone response elements
DcaCOL06	TATC-box	TATCCCA	1044	7	-	Oryza sativa	gibberellin responsive	Plant hormone response elements
DcaCOL06	TATC-box	TATCCCA	1500	7	+	Oryza sativa	gibberellin responsive	Plant hormone response elements
DcaCOL06	TATC-box	TATCCCA	1859	7	+	Oryza sativa	gibberellin responsive	Plant hormone response elements
DcaCOL06	P-box	CCTTTTG	921	7	+	Oryza sativa	gibberellin responsive	Plant hormone response elements
DcaCOL06	MYB	CCGTTG	152	6	-	Arabidopsis thaliana	MYB binding site involved in the drought, low temperature, salt, ABA, and GA stress responses	Biotic and abiotic stress response elements
DcaCOL06	MYB	CCGTTG	195	6	-	Arabidopsis thaliana	MYB binding site involved in the drought, low temperature, salt, ABA, and GA stress responses	Biotic and abiotic stress response elements
DcaCOL06	STRE	AGGGG	635	5	-	Arabidopsis thaliana	stress response element (STRE)	Biotic and abiotic stress response elements
DcaCOL06	STRE	AGGGG	835	5	-	Arabidopsis thaliana	stress response element (STRE)	Biotic and abiotic stress response elements
DcaCOL06	STRE	AGGGG	870	5	+	Arabidopsis thaliana	stress response element (STRE)	Biotic and abiotic stress response elements
DcaCOL06	MYB	CAACTG	171	6	-	Arabidopsis thaliana	MYB binding site involved in the drought, low temperature, salt, ABA, and GA stress responses	Biotic and abiotic stress response elements
DcaCOL06	MYB	CAACTG	629	6	+	Arabidopsis thaliana	MYB binding site involved in the drought, low temperature, salt, ABA, and GA stress responses	Biotic and abiotic stress response elements
DcaCOL06	MYB	TAACTG	848	6	+	Arabidopsis thaliana	MYB binding site involved in the drought, low temperature, salt, ABA, and GA stress responses	Biotic and abiotic stress response elements
DcaCOL06	MYB	TAACCA	1728	6	-	Arabidopsis thaliana	MYB binding site involved in the drought, low temperature, salt, ABA, and GA stress responses	Biotic and abiotic stress response elements
DcaCOL06	MYC	CATTTG	118	6	+	Arabidopsis thaliana	MYC binding site involved in the drought, salt, and ABA stress responses	Biotic and abiotic stress response elements
DcaCOL06	MYC	CATGTG	1070	6	+	Arabidopsis thaliana	MYC binding site involved in the drought, salt, and ABA stress responses	Biotic and abiotic stress response elements
DcaCOL06	AE-box	AGAAACAA	804	8	-	Arabidopsis thaliana	Light responsive	Light responsive elements
DcaCOL06	G-Box	CACGTT	603	6	+	Pisum sativum	Light responsive	Light responsive elements
DcaCOL06	TATA-box	TATA	406	4	+	Arabidopsis thaliana	core promoter element	Other elements
DcaCOL06	TATA-box	TATAAAT	462	7	-	Brassica juncea	core promoter element	Other elements
DcaCOL06	TATA-box	ATATAA	500	6	+	Brassica oleracea	core promoter element	Other elements
DcaCOL06	TATA-box	ATTATA	507	6	+	Brassica napus	core promoter element	Other elements
DcaCOL06	TATA-box	TATACA	541	6	-	Helianthus annuus	core promoter element	Other elements
DcaCOL06	TATA-box	ccTATAAAaa	977	9	+	Arabidopsis thaliana	core promoter element	Other elements
DcaCOL06	TATA-box	TATAAATA	1049	8	-	Daucus carota	core promoter element	Other elements
DcaCOL06	Box-4	ATTAAT	363	6	+	Petroselinum crispum	Light responsive	Light responsive elements
DcaCOL06	Myc	TCTCTTA	1215	7	-	Arabidopsis thaliana	MYC binding site involved in the drought, salt, and ABA stress responses	Biotic and abiotic stress response elements
DcaCOL06	TATA-box	TATAAAAT	501	8	+	Arabidopsis thaliana	core promoter element around -30 of transcription start	Other elements
DcaCOL06	MBS	CAACTG	171	6	-	Arabidopsis thaliana	MYB binding site involved in the drought, low temperature, salt, ABA, and GA stress responses	Biotic and abiotic stress response elements
DcaCOL06	MBS	CAACTG	629	6	+	Arabidopsis thaliana	MYB binding site involved in the drought, low temperature, salt, ABA, and GA stress responses	Biotic and abiotic stress response elements
DcaCOL06	MYB	CAACAG	1660	6	+	Nicotiana tabacum	MYB binding site involved in the drought, low temperature, salt, ABA, and GA stress responses	Biotic and abiotic stress response elements
DcaCOL06	MRE	AACCTAA	336	7	+	Petroselinum crispum	MYB binding site involved in light responsiveness	Light responsive elements
DcaCOL06	CGTCA-motif	CGTCA	277	5	-	Hordeum vulgare	cis-acting regulatory element involved in the MeJA-responsiveness	Plant hormone response elements
DcaCOL06	CGTCA-motif	CGTCA	598	5	-	Hordeum vulgare	cis-acting regulatory element involved in the MeJA-responsiveness	Plant hormone response elements
DcaCOL06	GA-motif	ATAGATAA	1984	8	-	Arabidopsis thaliana	Light responsive	Light responsive elements
DcaCOL06	box-S	AGCCACC	907	7	+	Arabidopsis thaliana	Light responsive	Light responsive elements
DcaCOL06	as-1	TGACG	277	5	+	Arabidopsis thaliana	cis-acting element involved in salicylic acid responsiveness	Plant hormone response elements
DcaCOL06	as-1	TGACG	598	5	+	Arabidopsis thaliana	cis-acting element involved in salicylic acid responsiveness	Plant hormone response elements
DcaCOL06	WUN-motif	AAATTACT	1530	8	-	Nicotiana glutinosa	wound-responsive element	Biotic and abiotic stress response elements
DcaCOL06	CCAAT-box	CAACGG	152	6	+	Hordeum vulgare	MYBHv1 binding site	Other elements
DcaCOL06	CCAAT-box	CAACGG	195	6	+	Hordeum vulgare	MYBHv1 binding site	Other elements
DcaCOL06	TGACG-motif	TGACG	277	5	+	Hordeum vulgare	cis-acting regulatory element involved in the MeJA-responsiveness	Plant hormone response elements
DcaCOL06	TGACG-motif	TGACG	598	5	+	Hordeum vulgare	cis-acting regulatory element involved in the MeJA-responsiveness	Plant hormone response elements
DcaCOL06	ABRE	ACGTG	603	5	-	Arabidopsis thaliana	Abscisic acid (ABA) responsive	Plant hormone response elements
DcaCOL06	CAAT-box	CAAT	51	4	+	Nicotiana glutinosa	core promoter element	Other elements
DcaCOL06	CAAT-box	CAAAT	119	5	-	Pisum sativum	core promoter element	Other elements
DcaCOL06	CAAT-box	CAAT	217	4	-	Nicotiana glutinosa	core promoter element	Other elements
DcaCOL06	CAAT-box	CAAT	243	4	-	Nicotiana glutinosa	core promoter element	Other elements
DcaCOL06	CAAT-box	CAAT	254	4	+	Nicotiana glutinosa	core promoter element	Other elements
DcaCOL06	CAAT-box	CCAAT	273	5	+	Arabidopsis thaliana	core promoter element	Other elements
DcaCOL06	CAAT-box	CAAT	292	4	+	Nicotiana glutinosa	core promoter element	Other elements
DcaCOL06	CAAT-box	CCAAT	317	5	-	Arabidopsis thaliana	core promoter element	Other elements
DcaCOL06	CAAT-box	CAAAT	350	5	+	Pisum sativum	core promoter element	Other elements
DcaCOL06	CAAT-box	CAAT	384	4	+	Nicotiana glutinosa	core promoter element	Other elements
DcaCOL06	CAAT-box	CAAT	431	4	+	Nicotiana glutinosa	core promoter element	Other elements
DcaCOL06	CAAT-box	CCAAT	665	5	-	Arabidopsis thaliana	core promoter element	Other elements
DcaCOL06	CAAT-box	CAAAT	736	5	+	Pisum sativum	core promoter element	Other elements
DcaCOL06	CAAT-box	CAAT	745	4	+	Nicotiana glutinosa	core promoter element	Other elements
DcaCOL06	CAAT-box	CCAAT	812	5	+	Arabidopsis thaliana	core promoter element	Other elements
DcaCOL06	CAAT-box	CAAAT	942	5	-	Pisum sativum	core promoter element	Other elements
DcaCOL06	CAAT-box	CAAAT	1026	5	-	Pisum sativum	core promoter element	Other elements
DcaCOL06	CAAT-box	CAAT	1302	4	+	Nicotiana glutinosa	core promoter element	Other elements
DcaCOL06	CAAT-box	CAAT	1317	4	-	Nicotiana glutinosa	core promoter element	Other elements
DcaCOL06	CAAT-box	CAAT	1337	4	-	Nicotiana glutinosa	core promoter element	Other elements
DcaCOL06	CAAT-box	CAAT	1484	4	-	Nicotiana glutinosa	core promoter element	Other elements
DcaCOL06	CAAT-box	CAAAT	1534	5	-	Pisum sativum	core promoter element	Other elements
DcaCOL06	CAAT-box	CAAT	1605	4	-	Nicotiana glutinosa	core promoter element	Other elements
DcaCOL06	CAAT-box	CAAAT	1648	5	+	Pisum sativum	core promoter element	Other elements
DcaCOL06	CAAT-box	CCAAT	1761	5	-	Arabidopsis thaliana	core promoter element	Other elements
DcaCOL06	CAAT-box	CAAAT	1852	5	-	Pisum sativum	core promoter element	Other elements
DcaCOL06	CAAT-box	CAAT	1990	4	-	Nicotiana glutinosa	core promoter element	Other elements
DcaCOL06	Sp1	GGGCGG	1271	6	-	Oryza sativa	Light responsive	Light responsive elements
DcaCOL06	WRE3	CCACCT	267	6	-	Pisum sativum	wound-responsive elements	Biotic and abiotic stress response elements
DcaCOL07	MYB	CCGTTG	1550	6	-	Arabidopsis thaliana	MYB binding site involved in the drought, low temperature, salt, ABA, and GA stress responses	Biotic and abiotic stress response elements
DcaCOL07	STRE	AGGGG	823	5	+	Arabidopsis thaliana	stress response element (STRE)	Biotic and abiotic stress response elements
DcaCOL07	STRE	AGGGG	836	5	+	Arabidopsis thaliana	stress response element (STRE)	Biotic and abiotic stress response elements
DcaCOL07	STRE	AGGGG	1039	5	+	Arabidopsis thaliana	stress response element (STRE)	Biotic and abiotic stress response elements
DcaCOL07	STRE	AGGGG	1044	5	+	Arabidopsis thaliana	stress response element (STRE)	Biotic and abiotic stress response elements
DcaCOL07	STRE	AGGGG	1717	5	-	Arabidopsis thaliana	stress response element (STRE)	Biotic and abiotic stress response elements
DcaCOL07	STRE	AGGGG	1810	5	-	Arabidopsis thaliana	stress response element (STRE)	Biotic and abiotic stress response elements
DcaCOL07	W-box	TTGACC	1564	6	+	Arabidopsis thaliana	responsible for inducing plant genes in response to pathogen attack	Biotic and abiotic stress response elements
DcaCOL07	MYB	TAACCA	80	6	+	Arabidopsis thaliana	MYB binding site involved in the drought, low temperature, salt, ABA, and GA stress responses	Biotic and abiotic stress response elements
DcaCOL07	GATA-motif	GATAGGA	769	7	-	Arabidopsis thaliana	Light responsive	Light responsive elements
DcaCOL07	GATA-motif	GATAGGA	1694	7	-	Arabidopsis thaliana	Light responsive	Light responsive elements
DcaCOL07	O2-site	GATGACATGG	432	9	-	Zea mays	cis-acting regulatory element involved in zein metabolism regulation	Cellular development involved elements
DcaCOL07	LTR	CCGAAA	1993	6	-	Hordeum vulgare	cis-acting element involved in low-temperature responsiveness	Biotic and abiotic stress response elements
DcaCOL07	GCN4-motif	TGAGTCA	368	7	-	Oryza sativa	cis-regulatory element involved in endosperm expression	Cellular development involved elements
DcaCOL07	MYB	TAACCA	80	6	+	Arabidopsis thaliana	MYB binding site involved in the drought, low temperature, salt, ABA, and GA stress responses	Biotic and abiotic stress response elements
DcaCOL07	MYB	CAACAG	349	6	+	Arabidopsis thaliana	MYB binding site involved in the drought, low temperature, salt, ABA, and GA stress responses	Biotic and abiotic stress response elements
DcaCOL07	MYB	CAACAG	373	6	+	Arabidopsis thaliana	MYB binding site involved in the drought, low temperature, salt, ABA, and GA stress responses	Biotic and abiotic stress response elements
DcaCOL07	MYB	CAACCA	380	6	-	Arabidopsis thaliana	MYB binding site involved in the drought, low temperature, salt, ABA, and GA stress responses	Biotic and abiotic stress response elements
DcaCOL07	TGACG-motif	TGACG	1193	5	-	Hordeum vulgare	cis-acting regulatory element involved in the MeJA-responsiveness	Plant hormone response elements
DcaCOL07	TGACG-motif	TGACG	1652	5	+	Hordeum vulgare	cis-acting regulatory element involved in the MeJA-responsiveness	Plant hormone response elements
DcaCOL07	MSA-like	TCCAACGGT	1548	9	+	Catharanthus roseus	cis-acting element involved in cell cycle regulation	Cellular development involved elements
DcaCOL07	CAAT-box	CCAAT	83	5	+	Arabidopsis thaliana	core promoter element	Other elements
DcaCOL07	CAAT-box	CAAAT	176	5	-	Pisum sativum	core promoter element	Other elements
DcaCOL07	CAAT-box	CAAT	186	4	+	Nicotiana glutinosa	core promoter element	Other elements
DcaCOL07	CAAT-box	CAAAT	287	5	-	Pisum sativum	core promoter element	Other elements
DcaCOL07	CAAT-box	CAAT	308	4	-	Nicotiana glutinosa	core promoter element	Other elements
DcaCOL07	CAAT-box	CCAAT	343	5	+	Arabidopsis thaliana	core promoter element	Other elements
DcaCOL07	CAAT-box	CCAAT	405	5	-	Arabidopsis thaliana	core promoter element	Other elements
DcaCOL07	CAAT-box	CAAAT	446	5	-	Pisum sativum	core promoter element	Other elements
DcaCOL07	CAAT-box	CAAT	497	4	-	Nicotiana glutinosa	core promoter element	Other elements
DcaCOL07	CAAT-box	CAAT	511	4	+	Nicotiana glutinosa	core promoter element	Other elements
DcaCOL07	CAAT-box	CCAAT	549	5	-	Arabidopsis thaliana	core promoter element	Other elements
DcaCOL07	CAAT-box	CAAT	669	4	-	Nicotiana glutinosa	core promoter element	Other elements
DcaCOL07	CAAT-box	CAAAT	688	5	+	Pisum sativum	core promoter element	Other elements
DcaCOL07	CAAT-box	CAAT	695	4	-	Nicotiana glutinosa	core promoter element	Other elements
DcaCOL07	CAAT-box	CAAT	876	4	-	Nicotiana glutinosa	core promoter element	Other elements
DcaCOL07	CAAT-box	CAAAT	883	5	+	Pisum sativum	core promoter element	Other elements
DcaCOL07	CAAT-box	CAAT	896	4	-	Nicotiana glutinosa	core promoter element	Other elements
DcaCOL07	CAAT-box	CAAT	926	4	+	Nicotiana glutinosa	core promoter element	Other elements
DcaCOL07	CAAT-box	CCAAT	965	5	-	Arabidopsis thaliana	core promoter element	Other elements
DcaCOL07	CAAT-box	CAAT	1008	4	+	Nicotiana glutinosa	core promoter element	Other elements
DcaCOL07	CAAT-box	CAAAT	1023	5	-	Pisum sativum	core promoter element	Other elements
DcaCOL07	CAAT-box	CAAAT	1034	5	-	Pisum sativum	core promoter element	Other elements
DcaCOL07	CAAT-box	CAAT	1082	4	-	Nicotiana glutinosa	core promoter element	Other elements
DcaCOL07	CAAT-box	CAAT	1102	4	-	Nicotiana glutinosa	core promoter element	Other elements
DcaCOL07	CAAT-box	CAAT	1132	4	+	Nicotiana glutinosa	core promoter element	Other elements
DcaCOL07	CAAT-box	CCAAT	1171	5	-	Arabidopsis thaliana	core promoter element	Other elements
DcaCOL07	CAAT-box	CAAAT	1185	5	-	Pisum sativum	core promoter element	Other elements
DcaCOL07	CAAT-box	CAAT	1196	4	+	Nicotiana glutinosa	core promoter element	Other elements
DcaCOL07	CAAT-box	CAAT	1214	4	+	Nicotiana glutinosa	core promoter element	Other elements
DcaCOL07	CAAT-box	CAAAT	1240	5	-	Pisum sativum	core promoter element	Other elements
DcaCOL07	CAAT-box	CCAAT	1250	5	+	Arabidopsis thaliana	core promoter element	Other elements
DcaCOL07	CAAT-box	CAAT	1272	4	+	Nicotiana glutinosa	core promoter element	Other elements
DcaCOL07	CAAT-box	CAAT	1315	4	-	Nicotiana glutinosa	core promoter element	Other elements
DcaCOL07	CAAT-box	CAAAT	1340	5	-	Pisum sativum	core promoter element	Other elements
DcaCOL07	CAAT-box	CCAAT	1359	5	+	Arabidopsis thaliana	core promoter element	Other elements
DcaCOL07	CAAT-box	CAAT	1435	4	+	Nicotiana glutinosa	core promoter element	Other elements
DcaCOL07	CAAT-box	CAAAT	1441	5	+	Pisum sativum	core promoter element	Other elements
DcaCOL07	CAAT-box	CAAT	1468	4	-	Nicotiana glutinosa	core promoter element	Other elements
DcaCOL07	CAAT-box	CAAT	1531	4	-	Nicotiana glutinosa	core promoter element	Other elements
DcaCOL07	CAAT-box	CAAT	1723	4	-	Nicotiana glutinosa	core promoter element	Other elements
DcaCOL07	CAAT-box	CAAT	1735	4	-	Nicotiana glutinosa	core promoter element	Other elements
DcaCOL07	CAAT-box	CCAAT	1757	5	+	Arabidopsis thaliana	core promoter element	Other elements
DcaCOL07	CAAT-box	TGCCAAC	1789	7	+	Petunia hybrida	core promoter element	Other elements
DcaCOL07	ABRE	ACGTG	1865	5	+	Arabidopsis thaliana	Abscisic acid (ABA) responsive	Plant hormone response elements
DcaCOL07	WRE3	CCACCT	377	6	-	Pisum sativum	wound-responsive elements	Biotic and abiotic stress response elements
DcaCOL07	ERE	ATTTCATA	786	8	-	Nicotiana glutinos	estrogen responsive element (ERE)	Plant hormone response elements
DcaCOL07	ERE	ATTTTAAA	1495	8	-	Nicotiana glutinos	estrogen responsive element (ERE)	Plant hormone response elements
DcaCOL07	dOCT	CACGGATC	23	8	-	Zea mays	other elements	Other elements
DcaCOL07	as-1	TGACG	1193	5	-	Arabidopsis thaliana	cis-acting element involved in salicylic acid responsiveness	Plant hormone response elements
DcaCOL07	as-1	TGACG	1652	5	+	Arabidopsis thaliana	cis-acting element involved in salicylic acid responsiveness	Plant hormone response elements
DcaCOL07	CCAAT-box	CAACGG	1550	6	+	Hordeum vulgare	MYBHv1 binding site	Other elements
DcaCOL07	MYB	CAACAG	349	6	+	Nicotiana tabacum	MYB binding site involved in the drought, low temperature, salt, ABA, and GA stress responses	Biotic and abiotic stress response elements
DcaCOL07	MYB	CAACAG	373	6	+	Nicotiana tabacum	MYB binding site involved in the drought, low temperature, salt, ABA, and GA stress responses	Biotic and abiotic stress response elements
DcaCOL07	CGTCA-motif	CGTCA	1193	5	+	Hordeum vulgare	cis-acting regulatory element involved in the MeJA-responsiveness	Plant hormone response elements
DcaCOL07	CGTCA-motif	CGTCA	1652	5	-	Hordeum vulgare	cis-acting regulatory element involved in the MeJA-responsiveness	Plant hormone response elements
DcaCOL07	chs-CMA1a	TTACTTAA	1138	8	-	Daucus carota	Light responsive	Light responsive elements
DcaCOL07	TATA-box	TATATA	804	6	+	Arabidopsis thaliana	core promoter element	Other elements
DcaCOL07	TATA-box	TATAA	77	5	-	Arabidopsis thaliana	core promoter element	Other elements
DcaCOL07	TATA-box	ATTATA	103	6	+	Brassica napus	core promoter element	Other elements
DcaCOL07	TATA-box	TATAA	416	5	-	Arabidopsis thaliana	core promoter element	Other elements
DcaCOL07	TATA-box	TATACA	557	6	-	Helianthus annuus	core promoter element	Other elements
DcaCOL07	TATA-box	ATATAT	803	6	+	Brassica napus	core promoter element	Other elements
DcaCOL07	TATA-box	ccTATAAAaa	847	9	+	Arabidopsis thaliana	core promoter element	Other elements
DcaCOL07	TATA-box	TAAAGATT	927	8	-	Arabidopsis thaliana	core promoter element	Other elements
DcaCOL07	TATA-box	TATA	1000	4	+	Arabidopsis thaliana	core promoter element	Other elements
DcaCOL07	TATA-box	ccTATAAAaa	1054	9	+	Arabidopsis thaliana	core promoter element	Other elements
DcaCOL07	TATA-box	TATA	1112	4	-	Arabidopsis thaliana	core promoter element	Other elements
DcaCOL07	TATA-box	TATA	1369	4	-	Arabidopsis thaliana	core promoter element	Other elements
DcaCOL07	TATA-box	TATAA	1521	5	-	Arabidopsis thaliana	core promoter element	Other elements
DcaCOL07	TATA-box	TATAAAT	1880	7	-	Brassica juncea	core promoter element	Other elements
DcaCOL07	DRE core	GCCGAC	1610	6	-	Arabidopsis thaliana	Drought-Responsive Element	Biotic and abiotic stress response elements
DcaCOL07	G-Box	CACGTT	1864	6	-	Pisum sativum	Light responsive	Light responsive elements
DcaCOL07	Box-4	ATTAAT	1253	6	-	Petroselinum crispum	Light responsive	Light responsive elements
DcaCOL08	MYB	CAACAG	916	6	-	Nicotiana tabacum	MYB binding site involved in the drought, low temperature, salt, ABA, and GA stress responses	Biotic and abiotic stress response elements
DcaCOL08	MYB	CAACAG	1381	6	-	Nicotiana tabacum	MYB binding site involved in the drought, low temperature, salt, ABA, and GA stress responses	Biotic and abiotic stress response elements
DcaCOL08	MYB	CAACAG	1758	6	+	Nicotiana tabacum	MYB binding site involved in the drought, low temperature, salt, ABA, and GA stress responses	Biotic and abiotic stress response elements
DcaCOL08	MRE	AACCTAA	1010	7	-	Petroselinum crispum	MYB binding site involved in light responsiveness	Light responsive elements
DcaCOL08	MRE	AACCTAA	1470	7	+	Petroselinum crispum	MYB binding site involved in light responsiveness	Light responsive elements
DcaCOL08	ARE	AAACCA	768	6	-	Zea mays	cis-acting regulatory element essential for the anaerobic induction	Cellular development involved elements
DcaCOL08	ARE	AAACCA	944	6	-	Zea mays	cis-acting regulatory element essential for the anaerobic induction	Cellular development involved elements
DcaCOL08	TCCC-motif	TCTCCCT	1771	7	+	Spinacia oleracea	Light responsive	Light responsive elements
DcaCOL08	TATA-box	TATAAAAT	212	8	+	Arabidopsis thaliana	core promoter element around -30 of transcription start	Other elements
DcaCOL08	MBS	CAACTG	44	6	+	Arabidopsis thaliana	MYB binding site involved in the drought, low temperature, salt, ABA, and GA stress responses	Biotic and abiotic stress response elements
DcaCOL08	Box-4	ATTAAT	179	6	+	Petroselinum crispum	Light responsive	Light responsive elements
DcaCOL08	Box-4	ATTAAT	431	6	+	Petroselinum crispum	Light responsive	Light responsive elements
DcaCOL08	Box-4	ATTAAT	497	6	+	Petroselinum crispum	Light responsive	Light responsive elements
DcaCOL08	Box-4	ATTAAT	1497	6	-	Petroselinum crispum	Light responsive	Light responsive elements
DcaCOL08	Box-4	ATTAAT	1977	6	-	Petroselinum crispum	Light responsive	Light responsive elements
DcaCOL08	TATA-box	TATATA	1954	6	-	Arabidopsis thaliana	core promoter element	Other elements
DcaCOL08	G-box	TACGTG	451	6	-	Arabidopsis thaliana	Light responsive	Light responsive elements
DcaCOL08	G-box	CACGTG	521	6	+	Arabidopsis thaliana	Light responsive	Light responsive elements
DcaCOL08	MYC	CATGTG	801	6	+	Arabidopsis thaliana	MYC binding site involved in the drought, salt, and ABA stress responses	Biotic and abiotic stress response elements
DcaCOL08	G-Box	CACGTT	135	6	-	Pisum sativum	Light responsive	Light responsive elements
DcaCOL08	G-Box	CACGTT	169	6	+	Pisum sativum	Light responsive	Light responsive elements
DcaCOL08	G-Box	CACGTG	521	6	+	Pisum sativum	Light responsive	Light responsive elements
DcaCOL08	TATA-box	TATA	22	4	+	Arabidopsis thaliana	core promoter element	Other elements
DcaCOL08	TATA-box	TATA	118	4	+	Arabidopsis thaliana	core promoter element	Other elements
DcaCOL08	TATA-box	ccTATAAAaa	123	9	+	Arabidopsis thaliana	core promoter element	Other elements
DcaCOL08	TATA-box	TATAAAA	209	7	-	Pisum sativum	core promoter element	Other elements
DcaCOL08	TATA-box	ATTATA	247	6	+	Brassica napus	core promoter element	Other elements
DcaCOL08	TATA-box	ATATAA	478	6	+	Brassica oleracea	core promoter element	Other elements
DcaCOL08	TATA-box	TATAA	534	5	-	Arabidopsis thaliana	core promoter element	Other elements
DcaCOL08	TATA-box	TATACA	546	6	-	Helianthus annuus	core promoter element	Other elements
DcaCOL08	TATA-box	TATA	758	4	+	Arabidopsis thaliana	core promoter element	Other elements
DcaCOL08	TATA-box	ATTATA	848	6	+	Brassica napus	core promoter element	Other elements
DcaCOL08	TATA-box	ATATAT	868	6	+	Brassica napus	core promoter element	Other elements
DcaCOL08	TATA-box	TACAAAA	879	7	-	Oryza sativa	core promoter element	Other elements
DcaCOL08	TATA-box	ATATAT	937	6	+	Brassica napus	core promoter element	Other elements
DcaCOL08	TATA-box	ATATAA	998	6	+	Brassica oleracea	core promoter element	Other elements
DcaCOL08	TATA-box	TACAAAA	1054	7	-	Oryza sativa	core promoter element	Other elements
DcaCOL08	TATA-box	TATAA	1084	5	-	Arabidopsis thaliana	core promoter element	Other elements
DcaCOL08	TATA-box	TATACA	1108	6	-	Helianthus annuus	core promoter element	Other elements
DcaCOL08	TATA-box	TATA	1139	4	-	Arabidopsis thaliana	core promoter element	Other elements
DcaCOL08	TATA-box	TATAA	1221	5	-	Arabidopsis thaliana	core promoter element	Other elements
DcaCOL08	TATA-box	TATAAAA	1418	7	-	Pisum sativum	core promoter element	Other elements
DcaCOL08	TATA-box	TATA	1463	4	-	Arabidopsis thaliana	core promoter element	Other elements
DcaCOL08	TATA-box	TATTTAAA	1937	8	-	Arabidopsis thaliana	core promoter element	Other elements
DcaCOL08	TATA-box	ATTATA	1952	6	+	Brassica napus	core promoter element	Other elements
DcaCOL08	TATA-box	TACAAAA	1964	7	+	Oryza sativa	core promoter element	Other elements
DcaCOL08	ABRE	TACGTG	451	6	-	Zea mays	Abscisic acid (ABA) responsive	Plant hormone response elements
DcaCOL08	ATCT-motif	AATCTAATCC	630	9	-	Pisum sativum	Light responsive	Light responsive elements
DcaCOL08	WRE3	CCACCT	1302	6	+	Pisum sativum	wound-responsive elements	Biotic and abiotic stress response elements
DcaCOL08	ABRE	CACGTA	451	6	+	Zea mays	Abscisic acid (ABA) responsive	Plant hormone response elements
DcaCOL08	CAAT-box	CAAT	80	4	+	Nicotiana glutinosa	core promoter element	Other elements
DcaCOL08	CAAT-box	CAAT	200	4	-	Nicotiana glutinosa	core promoter element	Other elements
DcaCOL08	CAAT-box	CAAT	235	4	-	Nicotiana glutinosa	core promoter element	Other elements
DcaCOL08	CAAT-box	CAAT	272	4	+	Nicotiana glutinosa	core promoter element	Other elements
DcaCOL08	CAAT-box	CAAT	426	4	-	Nicotiana glutinosa	core promoter element	Other elements
DcaCOL08	CAAT-box	CAAT	466	4	-	Nicotiana glutinosa	core promoter element	Other elements
DcaCOL08	CAAT-box	CAAT	491	4	-	Nicotiana glutinosa	core promoter element	Other elements
DcaCOL08	CAAT-box	CAAT	544	4	-	Nicotiana glutinosa	core promoter element	Other elements
DcaCOL08	CAAT-box	CAAT	554	4	-	Nicotiana glutinosa	core promoter element	Other elements
DcaCOL08	CAAT-box	CAAT	559	4	-	Nicotiana glutinosa	core promoter element	Other elements
DcaCOL08	CAAT-box	CAAT	564	4	-	Nicotiana glutinosa	core promoter element	Other elements
DcaCOL08	CAAT-box	CAAAT	626	5	-	Pisum sativum	core promoter element	Other elements
DcaCOL08	CAAT-box	CAAT	642	4	-	Nicotiana glutinosa	core promoter element	Other elements
DcaCOL08	CAAT-box	CAAT	647	4	-	Nicotiana glutinosa	core promoter element	Other elements
DcaCOL08	CAAT-box	CAAT	652	4	-	Nicotiana glutinosa	core promoter element	Other elements
DcaCOL08	CAAT-box	CAAT	669	4	+	Nicotiana glutinosa	core promoter element	Other elements
DcaCOL08	CAAT-box	CAAAT	714	5	-	Pisum sativum	core promoter element	Other elements
DcaCOL08	CAAT-box	CAAT	732	4	+	Nicotiana glutinosa	core promoter element	Other elements
DcaCOL08	CAAT-box	CCAAT	766	5	-	Arabidopsis thaliana	core promoter element	Other elements
DcaCOL08	CAAT-box	CAAT	897	4	-	Nicotiana glutinosa	core promoter element	Other elements
DcaCOL08	CAAT-box	CAAT	989	4	-	Nicotiana glutinosa	core promoter element	Other elements
DcaCOL08	CAAT-box	CAAT	1158	4	+	Nicotiana glutinosa	core promoter element	Other elements
DcaCOL08	CAAT-box	CAAT	1453	4	+	Nicotiana glutinosa	core promoter element	Other elements
DcaCOL08	CAAT-box	CCAAT	1477	5	+	Arabidopsis thaliana	core promoter element	Other elements
DcaCOL08	CAAT-box	CAAT	1510	4	-	Nicotiana glutinosa	core promoter element	Other elements
DcaCOL08	CAAT-box	CAAT	1537	4	+	Nicotiana glutinosa	core promoter element	Other elements
DcaCOL08	CAAT-box	CCAAT	1547	5	+	Arabidopsis thaliana	core promoter element	Other elements
DcaCOL08	CAAT-box	CAAT	1582	4	+	Nicotiana glutinosa	core promoter element	Other elements
DcaCOL08	CAAT-box	CCAAT	1741	5	+	Arabidopsis thaliana	core promoter element	Other elements
DcaCOL08	CAAT-box	CCAAT	1782	5	+	Arabidopsis thaliana	core promoter element	Other elements
DcaCOL08	CAAT-box	CAAT	1931	4	-	Nicotiana glutinosa	core promoter element	Other elements
DcaCOL08	GARE-motif	TCTGTTG	1758	7	-	Brassica oleracea	gibberellin-responsive element	Plant hormone response elements
DcaCOL08	ABRE	ACGTG	136	5	+	Arabidopsis thaliana	Abscisic acid (ABA) responsive	Plant hormone response elements
DcaCOL08	ABRE	ACGTG	169	5	-	Arabidopsis thaliana	Abscisic acid (ABA) responsive	Plant hormone response elements
DcaCOL08	ABRE	ACGTG	451	5	-	Arabidopsis thaliana	Abscisic acid (ABA) responsive	Plant hormone response elements
DcaCOL08	ABRE	CACGTG	521	6	+	Arabidopsis thaliana	Abscisic acid (ABA) responsive	Plant hormone response elements
DcaCOL08	ABRE	ACGTG	522	5	+	Arabidopsis thaliana	Abscisic acid (ABA) responsive	Plant hormone response elements
DcaCOL08	ABRE	AACCCGG	1808	7	+	Arabidopsis thaliana	Abscisic acid (ABA) responsive	Plant hormone response elements
DcaCOL08	ERE	ATTTTAAA	229	8	-	Nicotiana glutinos	estrogen responsive element (ERE)	Plant hormone response elements
DcaCOL08	ERE	ATTTCATA	955	8	+	Nicotiana glutinos	estrogen responsive element (ERE)	Plant hormone response elements
DcaCOL08	ERE	ATTTTAAA	1923	8	+	Nicotiana glutinos	estrogen responsive element (ERE)	Plant hormone response elements
DcaCOL08	ERE	ATTTTAAA	1925	8	-	Nicotiana glutinos	estrogen responsive element (ERE)	Plant hormone response elements
DcaCOL08	TCT-motif	TCTTAC	745	6	+	Arabidopsis thaliana	Light responsive	Light responsive elements
DcaCOL08	TCT-motif	TCTTAC	900	6	-	Arabidopsis thaliana	Light responsive	Light responsive elements
DcaCOL08	GT1-motif	GGTTAAT	1467	7	-	Avena sativa	Light responsive	Light responsive elements
DcaCOL08	GT1-motif	GGTTAA	1468	6	-	Arabidopsis thaliana	Light responsive	Light responsive elements
DcaCOL08	GT1-motif	GGTTAAT	1764	7	-	Avena sativa	Light responsive	Light responsive elements
DcaCOL08	GT1-motif	GGTTAA	1765	6	-	Arabidopsis thaliana	Light responsive	Light responsive elements
DcaCOL08	MYB	CAACAG	916	6	-	Arabidopsis thaliana	MYB binding site involved in the drought, low temperature, salt, ABA, and GA stress responses	Biotic and abiotic stress response elements
DcaCOL08	MYB	TAACCA	1073	6	-	Arabidopsis thaliana	MYB binding site involved in the drought, low temperature, salt, ABA, and GA stress responses	Biotic and abiotic stress response elements
DcaCOL08	MYB	CAACCA	1357	6	+	Arabidopsis thaliana	MYB binding site involved in the drought, low temperature, salt, ABA, and GA stress responses	Biotic and abiotic stress response elements
DcaCOL08	MYB	CAACAG	1381	6	-	Arabidopsis thaliana	MYB binding site involved in the drought, low temperature, salt, ABA, and GA stress responses	Biotic and abiotic stress response elements
DcaCOL08	MYB	TAACCA	1474	6	+	Arabidopsis thaliana	MYB binding site involved in the drought, low temperature, salt, ABA, and GA stress responses	Biotic and abiotic stress response elements
DcaCOL08	MYB	CAACAG	1758	6	+	Arabidopsis thaliana	MYB binding site involved in the drought, low temperature, salt, ABA, and GA stress responses	Biotic and abiotic stress response elements
DcaCOL08	GCN4-motif	TGAGTCA	1094	7	-	Oryza sativa	cis-regulatory element involved in endosperm expression	Cellular development involved elements
DcaCOL08	AAGAA-motif	GAAAGAA	1639	7	+	Avena sativa	Abscisic acid (ABA) responsive	Plant hormone response elements
DcaCOL08	MYB	TAACCA	1073	6	-	Arabidopsis thaliana	MYB binding site involved in the drought, low temperature, salt, ABA, and GA stress responses	Biotic and abiotic stress response elements
DcaCOL08	MYB	TAACCA	1474	6	+	Arabidopsis thaliana	MYB binding site involved in the drought, low temperature, salt, ABA, and GA stress responses	Biotic and abiotic stress response elements
DcaCOL08	W-box	TTGACC	371	6	-	Arabidopsis thaliana	responsible for inducing plant genes in response to pathogen attack	Biotic and abiotic stress response elements
DcaCOL08	W-box	TTGACC	1405	6	-	Arabidopsis thaliana	responsible for inducing plant genes in response to pathogen attack	Biotic and abiotic stress response elements
DcaCOL08	MYB	CAACTG	44	6	+	Arabidopsis thaliana	MYB binding site involved in the drought, low temperature, salt, ABA, and GA stress responses	Biotic and abiotic stress response elements
DcaCOL08	MYB	TAACTG	510	6	+	Arabidopsis thaliana	MYB binding site involved in the drought, low temperature, salt, ABA, and GA stress responses	Biotic and abiotic stress response elements
DcaCOL08	MYB	TAACTG	1101	6	+	Arabidopsis thaliana	MYB binding site involved in the drought, low temperature, salt, ABA, and GA stress responses	Biotic and abiotic stress response elements
DcaCOL08	MYB	TAACTG	1585	6	+	Arabidopsis thaliana	MYB binding site involved in the drought, low temperature, salt, ABA, and GA stress responses	Biotic and abiotic stress response elements
DcaCOL08	I-box	AAGATAAGGCT	1794	10	+	Gossypium hirsutum	Light responsive	Light responsive elements
DcaCOL08	I-box	AGATAAGG	1795	8	+	Triticum aestivum	Light responsive	Light responsive elements
DcaCOL08	LTR	CCGAAA	1714	6	+	Hordeum vulgare	cis-acting element involved in low-temperature responsiveness	Biotic and abiotic stress response elements
DcaCOL08	TATC-box	TATCCCA	1843	7	+	Oryza sativa	gibberellin responsive	Plant hormone response elements
DcaCOL09	AAGAA-motif	GAAAGAA	1945	7	+	Avena sativa	Abscisic acid (ABA) responsive	Plant hormone response elements
DcaCOL09	CAT-box	GCCACT	1476	6	+	Arabidopsis thaliana	related to meristem specific activation	Cellular development involved elements
DcaCOL09	MYB	TAACCA	839	6	+	Arabidopsis thaliana	MYB binding site involved in the drought, low temperature, salt, ABA, and GA stress responses	Biotic and abiotic stress response elements
DcaCOL09	MYB	CAACCA	1289	6	+	Arabidopsis thaliana	MYB binding site involved in the drought, low temperature, salt, ABA, and GA stress responses	Biotic and abiotic stress response elements
DcaCOL09	MYB	CAACAG	1377	6	-	Arabidopsis thaliana	MYB binding site involved in the drought, low temperature, salt, ABA, and GA stress responses	Biotic and abiotic stress response elements
DcaCOL09	A-box	CCGTCC	1848	6	+	Petroselinum crispum	cis-acting regulatory element	Other elements
DcaCOL09	TGA-element	AACGAC	1213	6	-	Brassica oleracea	auxin-responsive element	Plant hormone response elements
DcaCOL09	circadian	CAAAGATATC	749	9	+	Lycopersicon esculentum	cis-acting regulatory element involved in circadian control	Cellular development involved elements
DcaCOL09	P-box	CCTTTTG	956	7	+	Oryza sativa	gibberellin responsive	Plant hormone response elements
DcaCOL09	STRE	AGGGG	1365	5	-	Arabidopsis thaliana	stress response element (STRE)	Biotic and abiotic stress response elements
DcaCOL09	STRE	AGGGG	1397	5	-	Arabidopsis thaliana	stress response element (STRE)	Biotic and abiotic stress response elements
DcaCOL09	STRE	AGGGG	1511	5	-	Arabidopsis thaliana	stress response element (STRE)	Biotic and abiotic stress response elements
DcaCOL09	CCGTCC-box	CCGTCC	1848	6	+	Nicotiana tabacum	related to meristem specific activation	Cellular development involved elements
DcaCOL09	MYB	TAACCA	839	6	+	Arabidopsis thaliana	MYB binding site involved in the drought, low temperature, salt, ABA, and GA stress responses	Biotic and abiotic stress response elements
DcaCOL09	MYB	TAACTG	79	6	-	Arabidopsis thaliana	MYB binding site involved in the drought, low temperature, salt, ABA, and GA stress responses	Biotic and abiotic stress response elements
DcaCOL09	I-box	GATAAGGGT	657	9	-	Arabidopsis thaliana	Light responsive	Light responsive elements
DcaCOL09	O2-site	GATGA(C/T)(A/G)TG(A/G)	158	8	-	Zea mays	cis-acting regulatory element involved in zein metabolism regulation	Cellular development involved elements
DcaCOL09	O2-site	GATGATGTGG	1889	9	-	Zea mays	cis-acting regulatory element involved in zein metabolism regulation	Cellular development involved elements
DcaCOL09	TATA-box	TATATA	556	6	+	Arabidopsis thaliana	core promoter element	Other elements
DcaCOL09	MYC	CATTTG	255	6	-	Arabidopsis thaliana	MYC binding site involved in the drought, salt, and ABA stress responses	Biotic and abiotic stress response elements
DcaCOL09	MYC	CATTTG	469	6	-	Arabidopsis thaliana	MYC binding site involved in the drought, salt, and ABA stress responses	Biotic and abiotic stress response elements
DcaCOL09	MYC	CATTTG	856	6	+	Arabidopsis thaliana	MYC binding site involved in the drought, salt, and ABA stress responses	Biotic and abiotic stress response elements
DcaCOL09	MYC	CATGTG	1127	6	-	Arabidopsis thaliana	MYC binding site involved in the drought, salt, and ABA stress responses	Biotic and abiotic stress response elements
DcaCOL09	G-box	GCCACGTGGA	1816	9	-	Arabidopsis thaliana	Light responsive	Light responsive elements
DcaCOL09	G-box	CACGTG	1818	6	-	Arabidopsis thaliana	Light responsive	Light responsive elements
DcaCOL09	G-Box	CACGTG	1818	6	-	Pisum sativum	Light responsive	Light responsive elements
DcaCOL09	TATA-box	TACAAAA	38	7	-	Oryza sativa	core promoter element	Other elements
DcaCOL09	TATA-box	TAAAGATT	43	8	+	Arabidopsis thaliana	core promoter element	Other elements
DcaCOL09	TATA-box	TATAA	277	5	-	Arabidopsis thaliana	core promoter element	Other elements
DcaCOL09	TATA-box	TATAA	343	5	-	Arabidopsis thaliana	core promoter element	Other elements
DcaCOL09	TATA-box	TATAAA	533	6	-	Helianthus annuus	core promoter element	Other elements
DcaCOL09	TATA-box	TATA	541	4	+	Arabidopsis thaliana	core promoter element	Other elements
DcaCOL09	TATA-box	TATATA	556	6	+	Arabidopsis thaliana	core promoter element	Other elements
DcaCOL09	TATA-box	TATA	966	4	+	Arabidopsis thaliana	core promoter element	Other elements
DcaCOL09	TATA-box	TATA	1297	4	-	Arabidopsis thaliana	core promoter element	Other elements
DcaCOL09	TATA-box	TATA	1463	4	-	Arabidopsis thaliana	core promoter element	Other elements
DcaCOL09	TATA-box	TATA	1481	4	-	Arabidopsis thaliana	core promoter element	Other elements
DcaCOL09	TATA-box	ATATAA	1504	6	+	Brassica oleracea	core promoter element	Other elements
DcaCOL09	TATA-box	ATATAA	1566	6	+	Brassica oleracea	core promoter element	Other elements
DcaCOL09	TATA-box	ATATAA	1594	6	+	Brassica oleracea	core promoter element	Other elements
DcaCOL09	TATA-box	ATTATA	1628	6	+	Brassica napus	core promoter element	Other elements
DcaCOL09	TATA-box	ATTATA	1651	6	+	Brassica napus	core promoter element	Other elements
DcaCOL09	TATA-box	ATTATA	1667	6	+	Brassica napus	core promoter element	Other elements
DcaCOL09	TATA-box	ATATAT	1691	6	-	Brassica napus	core promoter element	Other elements
DcaCOL09	TATA-box	ccTATAAAaa	1699	9	+	Arabidopsis thaliana	core promoter element	Other elements
DcaCOL09	TATA-box	TATAAAA	1776	7	-	Pisum sativum	core promoter element	Other elements
DcaCOL09	DRE core	GCCGAC	822	6	+	Arabidopsis thaliana	Drought-Responsive Element	Biotic and abiotic stress response elements
DcaCOL09	DRE core	GCCGAC	1083	6	+	Arabidopsis thaliana	Drought-Responsive Element	Biotic and abiotic stress response elements
DcaCOL09	DRE core	GCCGAC	1354	6	+	Arabidopsis thaliana	Drought-Responsive Element	Biotic and abiotic stress response elements
DcaCOL09	TATA-box	TATAAAAT	1775	8	-	Arabidopsis thaliana	core promoter element around -30 of transcription start	Other elements
DcaCOL09	Box-4	ATTAAT	304	6	+	Petroselinum crispum	Light responsive	Light responsive elements
DcaCOL09	Box-4	ATTAAT	420	6	+	Petroselinum crispum	Light responsive	Light responsive elements
DcaCOL09	Box-4	ATTAAT	454	6	+	Petroselinum crispum	Light responsive	Light responsive elements
DcaCOL09	TCA	TCATCTTCAT	498	9	+	Pisum sativum	cis-acting element involved in salicylic acid responsiveness	Plant hormone response elements
DcaCOL09	TCA	TCATCTTCAT	1515	9	+	Pisum sativum	cis-acting element involved in salicylic acid responsiveness	Plant hormone response elements
DcaCOL09	MYB	CAACAG	1377	6	-	Nicotiana tabacum	MYB binding site involved in the drought, low temperature, salt, ABA, and GA stress responses	Biotic and abiotic stress response elements
DcaCOL09	CGTCA-motif	CGTCA	853	5	+	Hordeum vulgare	cis-acting regulatory element involved in the MeJA-responsiveness	Plant hormone response elements
DcaCOL09	CGTCA-motif	CGTCA	1063	5	+	Hordeum vulgare	cis-acting regulatory element involved in the MeJA-responsiveness	Plant hormone response elements
DcaCOL09	CGTCA-motif	CGTCA	1184	5	+	Hordeum vulgare	cis-acting regulatory element involved in the MeJA-responsiveness	Plant hormone response elements
DcaCOL09	CGTCA-motif	CGTCA	1417	5	+	Hordeum vulgare	cis-acting regulatory element involved in the MeJA-responsiveness	Plant hormone response elements
DcaCOL09	MRE	AACCTAA	220	7	+	Petroselinum crispum	MYB binding site involved in light responsiveness	Light responsive elements
DcaCOL09	TCT-motif	TCTTAC	72	6	-	Arabidopsis thaliana	Light responsive	Light responsive elements
DcaCOL09	TCT-motif	TCTTAC	212	6	-	Arabidopsis thaliana	Light responsive	Light responsive elements
DcaCOL09	TCT-motif	TCTTAC	1054	6	+	Arabidopsis thaliana	Light responsive	Light responsive elements
DcaCOL09	ERE	ATTTTAAA	324	8	+	Nicotiana glutinos	estrogen responsive element (ERE)	Plant hormone response elements
DcaCOL09	ERE	ATTTTAAA	326	8	-	Nicotiana glutinos	estrogen responsive element (ERE)	Plant hormone response elements
DcaCOL09	box-S	AGCCACC	721	7	+	Arabidopsis thaliana	Light responsive	Light responsive elements
DcaCOL09	as-1	TGACG	853	5	-	Arabidopsis thaliana	cis-acting element involved in salicylic acid responsiveness	Plant hormone response elements
DcaCOL09	as-1	TGACG	1063	5	-	Arabidopsis thaliana	cis-acting element involved in salicylic acid responsiveness	Plant hormone response elements
DcaCOL09	as-1	TGACG	1184	5	-	Arabidopsis thaliana	cis-acting element involved in salicylic acid responsiveness	Plant hormone response elements
DcaCOL09	as-1	TGACG	1417	5	-	Arabidopsis thaliana	cis-acting element involved in salicylic acid responsiveness	Plant hormone response elements
DcaCOL09	TGACG-motif	TGACG	853	5	-	Hordeum vulgare	cis-acting regulatory element involved in the MeJA-responsiveness	Plant hormone response elements
DcaCOL09	TGACG-motif	TGACG	1063	5	-	Hordeum vulgare	cis-acting regulatory element involved in the MeJA-responsiveness	Plant hormone response elements
DcaCOL09	TGACG-motif	TGACG	1184	5	-	Hordeum vulgare	cis-acting regulatory element involved in the MeJA-responsiveness	Plant hormone response elements
DcaCOL09	TGACG-motif	TGACG	1417	5	-	Hordeum vulgare	cis-acting regulatory element involved in the MeJA-responsiveness	Plant hormone response elements
DcaCOL09	SARE	TTCGACCATCTT	1175	11	+	Nicotiana tabacum	cis-acting element involved in salicylic acid responsiveness	Plant hormone response elements
DcaCOL09	ABRE	TACGGTC	1328	7	+	Arabidopsis thaliana	Abscisic acid (ABA) responsive	Plant hormone response elements
DcaCOL09	ABRE	GACACGTGGC	1816	9	-	Triticum aestivum	Abscisic acid (ABA) responsive	Plant hormone response elements
DcaCOL09	ABRE	CACGTG	1818	6	-	Arabidopsis thaliana	Abscisic acid (ABA) responsive	Plant hormone response elements
DcaCOL09	ABRE	ACGTG	1819	5	+	Arabidopsis thaliana	Abscisic acid (ABA) responsive	Plant hormone response elements
DcaCOL09	CAG-motif	GAAAGGCAGAC	1804	10	-	Arabidopsis thaliana	Light responsive	Light responsive elements
DcaCOL09	CAAT-box	CAAT	129	4	-	Nicotiana glutinosa	core promoter element	Other elements
DcaCOL09	CAAT-box	CAAT	176	4	+	Nicotiana glutinosa	core promoter element	Other elements
DcaCOL09	CAAT-box	CAAAT	196	5	+	Pisum sativum	core promoter element	Other elements
DcaCOL09	CAAT-box	CAAT	237	4	-	Nicotiana glutinosa	core promoter element	Other elements
DcaCOL09	CAAT-box	CAAAT	255	5	+	Pisum sativum	core promoter element	Other elements
DcaCOL09	CAAT-box	CCAAT	286	5	-	Arabidopsis thaliana	core promoter element	Other elements
DcaCOL09	CAAT-box	CAAT	308	4	-	Nicotiana glutinosa	core promoter element	Other elements
DcaCOL09	CAAT-box	CAAAT	350	5	+	Pisum sativum	core promoter element	Other elements
DcaCOL09	CAAT-box	CCAAT	386	5	+	Arabidopsis thaliana	core promoter element	Other elements
DcaCOL09	CAAT-box	CCAAT	417	5	+	Arabidopsis thaliana	core promoter element	Other elements
DcaCOL09	CAAT-box	CAAAT	469	5	+	Pisum sativum	core promoter element	Other elements
DcaCOL09	CAAT-box	CCAAT	588	5	-	Arabidopsis thaliana	core promoter element	Other elements
DcaCOL09	CAAT-box	CAAT	665	4	+	Nicotiana glutinosa	core promoter element	Other elements
DcaCOL09	CAAT-box	CCAAT	741	5	+	Arabidopsis thaliana	core promoter element	Other elements
DcaCOL09	CAAT-box	CAAT	786	4	-	Nicotiana glutinosa	core promoter element	Other elements
DcaCOL09	CAAT-box	CAAT	829	4	-	Nicotiana glutinosa	core promoter element	Other elements
DcaCOL09	CAAT-box	CAAAT	857	5	-	Pisum sativum	core promoter element	Other elements
DcaCOL09	CAAT-box	CCAAT	874	5	+	Arabidopsis thaliana	core promoter element	Other elements
DcaCOL09	CAAT-box	CAAT	885	4	+	Nicotiana glutinosa	core promoter element	Other elements
DcaCOL09	CAAT-box	CAAT	891	4	+	Nicotiana glutinosa	core promoter element	Other elements
DcaCOL09	CAAT-box	CAAT	952	4	+	Nicotiana glutinosa	core promoter element	Other elements
DcaCOL09	CAAT-box	CAAT	1000	4	-	Nicotiana glutinosa	core promoter element	Other elements
DcaCOL09	CAAT-box	CAAT	1043	4	-	Nicotiana glutinosa	core promoter element	Other elements
DcaCOL09	CAAT-box	CCAAT	1162	5	+	Arabidopsis thaliana	core promoter element	Other elements
DcaCOL09	CAAT-box	CAAT	1347	4	-	Nicotiana glutinosa	core promoter element	Other elements
DcaCOL09	CAAT-box	CAAT	1388	4	+	Nicotiana glutinosa	core promoter element	Other elements
DcaCOL09	CAAT-box	CAAT	1411	4	-	Nicotiana glutinosa	core promoter element	Other elements
DcaCOL09	CAAT-box	CCAAT	1434	5	+	Arabidopsis thaliana	core promoter element	Other elements
DcaCOL09	CAAT-box	CAAT	1450	4	-	Nicotiana glutinosa	core promoter element	Other elements
DcaCOL09	CAAT-box	CAAT	1526	4	-	Nicotiana glutinosa	core promoter element	Other elements
DcaCOL09	CAAT-box	CAAT	1559	4	-	Nicotiana glutinosa	core promoter element	Other elements
DcaCOL09	CAAT-box	CAAAT	1591	5	+	Pisum sativum	core promoter element	Other elements
DcaCOL09	CAAT-box	CAAT	1672	4	-	Nicotiana glutinosa	core promoter element	Other elements
DcaCOL09	CAAT-box	CAAT	1684	4	-	Nicotiana glutinosa	core promoter element	Other elements
DcaCOL09	CAAT-box	CAAT	1717	4	+	Nicotiana glutinosa	core promoter element	Other elements
DcaCOL09	CAAT-box	CAAT	1731	4	+	Nicotiana glutinosa	core promoter element	Other elements
DcaCOL09	CAAT-box	CAAT	1761	4	-	Nicotiana glutinosa	core promoter element	Other elements
DcaCOL09	CAAT-box	CAAT	1843	4	+	Nicotiana glutinosa	core promoter element	Other elements
DhuCOL01	DRE core	GCCGAC	1764	6	-	Arabidopsis thaliana	Drought-Responsive Element	Biotic and abiotic stress response elements
DhuCOL01	G-Box	CACGTT	1975	6	-	Pisum sativum	Light responsive	Light responsive elements
DhuCOL01	TATA-box	TATA	70	4	+	Arabidopsis thaliana	core promoter element	Other elements
DhuCOL01	TATA-box	ATTATA	190	6	+	Brassica napus	core promoter element	Other elements
DhuCOL01	TATA-box	ATTATA	399	6	+	Brassica napus	core promoter element	Other elements
DhuCOL01	TATA-box	TATAA	514	5	-	Arabidopsis thaliana	core promoter element	Other elements
DhuCOL01	TATA-box	ATATAT	652	6	+	Brassica napus	core promoter element	Other elements
DhuCOL01	TATA-box	ATATAT	897	6	+	Brassica napus	core promoter element	Other elements
DhuCOL01	TATA-box	TATTTAAA	1027	8	+	Arabidopsis thaliana	core promoter element	Other elements
DhuCOL01	TATA-box	TATA	1211	4	-	Arabidopsis thaliana	core promoter element	Other elements
DhuCOL01	TATA-box	TATAA	1359	5	-	Arabidopsis thaliana	core promoter element	Other elements
DhuCOL01	TATA-box	TATA	1467	4	-	Arabidopsis thaliana	core promoter element	Other elements
DhuCOL01	TATA-box	TATAA	1489	5	-	Arabidopsis thaliana	core promoter element	Other elements
DhuCOL01	TATA-box	TATAAAT	1592	7	-	Brassica juncea	core promoter element	Other elements
DhuCOL01	TATA-box	TATTTAAA	1617	8	+	Arabidopsis thaliana	core promoter element	Other elements
DhuCOL01	TATA-box	TATACA	1635	6	-	Helianthus annuus	core promoter element	Other elements
DhuCOL01	TATA-box	TATTTAAA	1655	8	-	Arabidopsis thaliana	core promoter element	Other elements
DhuCOL01	TATA-box	TATA	1670	4	-	Arabidopsis thaliana	core promoter element	Other elements
DhuCOL01	TATA-box	ATATAT	1675	6	-	Brassica napus	core promoter element	Other elements
DhuCOL01	G-box	TAACACGTAG	152	9	-	Brassica oleracea	Light responsive	Light responsive elements
DhuCOL01	GCN4-motif	TGAGTCA	466	7	-	Oryza sativa	cis-regulatory element involved in endosperm expression	Cellular development involved elements
DhuCOL01	TATA-box	TATATA	653	6	+	Arabidopsis thaliana	core promoter element	Other elements
DhuCOL01	TATA-box	TATATA	898	6	+	Arabidopsis thaliana	core promoter element	Other elements
DhuCOL01	TATA-box	TATATA	1676	6	-	Arabidopsis thaliana	core promoter element	Other elements
DhuCOL01	Box-4	ATTAAT	1229	6	-	Petroselinum crispum	Light responsive	Light responsive elements
DhuCOL01	Box-4	ATTAAT	1245	6	-	Petroselinum crispum	Light responsive	Light responsive elements
DhuCOL01	Box-4	ATTAAT	1352	6	-	Petroselinum crispum	Light responsive	Light responsive elements
DhuCOL01	Box-4	ATTAAT	1598	6	-	Petroselinum crispum	Light responsive	Light responsive elements
DhuCOL01	ARE	AAACCA	1417	6	+	Zea mays	cis-acting regulatory element essential for the anaerobic induction	Cellular development involved elements
DhuCOL01	CGTCA-motif	CGTCA	805	5	+	Hordeum vulgare	cis-acting regulatory element involved in the MeJA-responsiveness	Plant hormone response elements
DhuCOL01	CGTCA-motif	CGTCA	1292	5	+	Hordeum vulgare	cis-acting regulatory element involved in the MeJA-responsiveness	Plant hormone response elements
DhuCOL01	CGTCA-motif	CGTCA	1542	5	-	Hordeum vulgare	cis-acting regulatory element involved in the MeJA-responsiveness	Plant hormone response elements
DhuCOL01	CGTCA-motif	CGTCA	1806	5	-	Hordeum vulgare	cis-acting regulatory element involved in the MeJA-responsiveness	Plant hormone response elements
DhuCOL01	box-S	AGCCACC	1932	7	+	Arabidopsis thaliana	Light responsive	Light responsive elements
DhuCOL01	GA-motif	ATAGATAA	627	8	-	Arabidopsis thaliana	Light responsive	Light responsive elements
DhuCOL01	ERE	ATTTTAAA	1619	8	-	Nicotiana glutinos	estrogen responsive element (ERE)	Plant hormone response elements
DhuCOL01	ERE	ATTTTAAA	1653	8	+	Nicotiana glutinos	estrogen responsive element (ERE)	Plant hormone response elements
DhuCOL01	as-1	TGACG	805	5	-	Arabidopsis thaliana	cis-acting element involved in salicylic acid responsiveness	Plant hormone response elements
DhuCOL01	as-1	TGACG	1292	5	-	Arabidopsis thaliana	cis-acting element involved in salicylic acid responsiveness	Plant hormone response elements
DhuCOL01	as-1	TGACG	1542	5	+	Arabidopsis thaliana	cis-acting element involved in salicylic acid responsiveness	Plant hormone response elements
DhuCOL01	as-1	TGACG	1806	5	+	Arabidopsis thaliana	cis-acting element involved in salicylic acid responsiveness	Plant hormone response elements
DhuCOL01	CAAT-box	CAAT	26	4	+	Nicotiana glutinosa	core promoter element	Other elements
DhuCOL01	CAAT-box	CAAT	83	4	+	Nicotiana glutinosa	core promoter element	Other elements
DhuCOL01	CAAT-box	CCAAT	201	5	-	Arabidopsis thaliana	core promoter element	Other elements
DhuCOL01	CAAT-box	CAAAT	263	5	-	Pisum sativum	core promoter element	Other elements
DhuCOL01	CAAT-box	CAAT	273	4	+	Nicotiana glutinosa	core promoter element	Other elements
DhuCOL01	CAAT-box	CAAT	285	4	+	Nicotiana glutinosa	core promoter element	Other elements
DhuCOL01	CAAT-box	CAAT	325	4	+	Nicotiana glutinosa	core promoter element	Other elements
DhuCOL01	CAAT-box	CAAT	368	4	+	Nicotiana glutinosa	core promoter element	Other elements
DhuCOL01	CAAT-box	CAAAT	374	5	-	Pisum sativum	core promoter element	Other elements
DhuCOL01	CAAT-box	CAAT	395	4	-	Nicotiana glutinosa	core promoter element	Other elements
DhuCOL01	CAAT-box	CCAAT	441	5	+	Arabidopsis thaliana	core promoter element	Other elements
DhuCOL01	CAAT-box	CAAT	447	4	+	Nicotiana glutinosa	core promoter element	Other elements
DhuCOL01	CAAT-box	CAAT	461	4	+	Nicotiana glutinosa	core promoter element	Other elements
DhuCOL01	CAAT-box	CCAAT	503	5	-	Arabidopsis thaliana	core promoter element	Other elements
DhuCOL01	CAAT-box	CAAAT	544	5	-	Pisum sativum	core promoter element	Other elements
DhuCOL01	CAAT-box	CAAT	609	4	+	Nicotiana glutinosa	core promoter element	Other elements
DhuCOL01	CAAT-box	CCAAT	645	5	-	Arabidopsis thaliana	core promoter element	Other elements
DhuCOL01	CAAT-box	CCAAT	663	5	+	Arabidopsis thaliana	core promoter element	Other elements
DhuCOL01	CAAT-box	CAAT	761	4	-	Nicotiana glutinosa	core promoter element	Other elements
DhuCOL01	CAAT-box	CAAAT	784	5	+	Pisum sativum	core promoter element	Other elements
DhuCOL01	CAAT-box	CAAT	791	4	-	Nicotiana glutinosa	core promoter element	Other elements
DhuCOL01	CAAT-box	CAAT	974	4	-	Nicotiana glutinosa	core promoter element	Other elements
DhuCOL01	CAAT-box	CAAT	984	4	-	Nicotiana glutinosa	core promoter element	Other elements
DhuCOL01	CAAT-box	CAAT	994	4	-	Nicotiana glutinosa	core promoter element	Other elements
[truncated: 5,095 more rows]

## Sheet: Table S6
Table S6. Secondary structure prediction of orchid COL protein sequence.
TF Name	Alpha helix (Hh)	310 helix (Gg)	Pi helix (Ii)	Beta bridge (Bb)	Extended strand (Ee)	Beta turn (Tt)	Bend region (Ss)	Random coil (Cc)	Ambiguous states	Other states
AshCOL01	0.3804	0	0	0	0.1718	0.0491	0	0.3988	0	0
AshCOL02	0.3889	0	0	0	0.0425	0.0131	0	0.5556	0	0
AshCOL03	0.3815	0	0	0	0.1037	0.037	0	0.4778	0	0
AshCOL04	0.2893	0	0	0	0.1258	0.0314	0	0.5535	0	0
AshCOL05	0.385	0	0	0	0.092	0.0315	0	0.4915	0	0
AshCOL06	0.2347	0	0	0	0.1125	0.0342	0	0.6186	0	0
AshCOL07	0.3095	0	0	0	0.0992	0.0437	0	0.5476	0	0
AshCOL08	0.2704	0	0	0	0.1235	0.0443	0	0.5618	0	0
AshCOL09	0.2948	0	0	0	0.1185	0.0289	0	0.5578	0	0
AshCOL10	0.1917	0	0	0	0.1399	0.0259	0	0.6425	0	0
DcaCOL01	0.2723	0	0	0	0.1257	0.0366	0	0.5654	0	0
DcaCOL02	0.3631	0	0	0	0.0738	0.0277	0	0.5354	0	0
DcaCOL03	0.2066	0	0	0	0.1647	0.015	0	0.6138	0	0
DcaCOL04	0.2593	0	0	0	0.1028	0.0304	0	0.6075	0	0
DcaCOL05	0.4098	0	0	0	0.082	0.0246	0	0.4836	0	0
DcaCOL06	0.2554	0	0	0	0.0955	0.0263	0	0.6229	0	0
DcaCOL07	0.2876	0	0	0	0.1111	0.0327	0	0.5686	0	0
DcaCOL08	0.3899	0	0	0	0.0911	0.0329	0	0.4861	0	0
DcaCOL09	0.3645	0	0	0	0.0813	0.0241	0	0.5301	0	0
DhuCOL01	0.2946	0	0	0	0.1202	0.0361	0	0.5491	0	0
DhuCOL02	0.3415	0	0	0	0.1015	0.0338	0	0.5231	0	0
DhuCOL03	0.3121	0	0	0	0.1324	0.0307	0	0.5248	0	0
DhuCOL04	0.3962	0	0	0	0.0765	0.0219	0	0.5055	0	0
DhuCOL05	0.438	0	0	0	0.0911	0.0405	0	0.4304	0	0
DhuCOL06	0.2822	0	0	0	0.1245	0.0332	0	0.5602	0	0
DhuCOL07	0.363	0	0	0	0.0641	0.0178	0	0.5552	0	0
DhuCOL08	0.2787	0	0	0	0.1127	0.0307	0	0.5779	0	0
VplCOL01	0.2717	0	0	0	0.1014	0.0435	0	0.5833	0	0
VplCOL02	0.2051	0	0	0	0.1215	0.0405	0	0.6329	0	0
VplCOL03	0.2396	0	0	0	0.1213	0.0207	0	0.6183	0	0
VplCOL04	0.3043	0	0	0	0.0906	0.0399	0	0.5652	0	0
VplCOL05	0.337	0	0	0	0.0761	0.0254	0	0.5616	0	0
VplCOL06	0.3108	0	0	0	0.1046	0.0246	0	0.56	0	0
VplCOL07	0.3668	0	0	0	0.0983	0.024	0	0.5109	0	0
VplCOL08	0.3343	0	0	0	0.0881	0.0274	0	0.5502	0	0
VplCOL09	0.2819	0	0	0	0.1068	0.0356	0	0.5757	0	0
VplCOL10	0.2879	0	0	0	0.1187	0.0264	0	0.567	0	0
VplCOL11	0.2203	0	0	0	0.1332	0.0363	0	0.6102	0	0
VplCOL12	0.2294	0	0	0	0.1284	0.0183	0	0.6239	0	0
VplCOL13	0.3324	0	0	0	0.1346	0.0385	0	0.4945	0	0
VplCOL14	0.399	0	0	0	0.1035	0.0303	0	0.4672	0	0
DchCOL01	0.3857	0	0	0	0.0799	0.0386	0	0.4959	0	0
DchCOL02	0.4105	0	0	0	0.0689	0.0303	0	0.4904	0	0
DchCOL03	0.3855	0	0	0	0.0934	0.0331	0	0.488	0	0
DchCOL04	0.2384	0	0	0	0.1071	0.0341	0	0.6204	0	0
DchCOL05	0.3665	0	0	0	0.0641	0.0178	0	0.5516	0	0
DchCOL06	0.4369	0	0	0	0.0909	0.0354	0	0.4369	0	0
DchCOL07	0.2932	0	0	0	0.1142	0.034	0	0.5586	0	0
DchCOL08	0.3249	0	0	0	0.1259	0.0529	0	0.4962	0	0
DchCOL09	0.2295	0	0	0	0.1858	0.0546	0	0.5301	0	0
DchCOL10	0.2202	0	0	0	0.1528	0.0337	0	0.5933	0	0
CsiCOL01	0.3667	0	0	0	0.1	0.0273	0	0.5061	0	0
CsiCOL02	0.2512	0	0	0	0.1039	0.029	0	0.6159	0	0
CsiCOL03	0.3224	0	0	0	0.1145	0.0327	0	0.5304	0	0
CsiCOL04	0.337	0	0	0	0.0688	0.0217	0	0.5725	0	0
CsiCOL05	0.3098	0	0	0	0.1104	0.0368	0	0.5429	0	0
CsiCOL06	0.1988	0	0	0	0.1068	0.0089	0	0.6855	0	0
CsiCOL07	0.4141	0	0	0	0.0938	0.0286	0	0.4635	0	0
CsiCOL08	0.2571	0	0	0	0.1089	0.0349	0	0.5991	0	0
CsiCOL09	0.2697	0	0	0	0.0871	0.0498	0	0.5934	0	0
CsiCOL10	0.4242	0	0	0	0.0826	0.022	0	0.4711	0	0
PeqCOL01	0.2059	0	0	0	0.1265	0.0206	0	0.6471	0	0
PeqCOL02	0.3599	0	0	0	0.1146	0.0255	0	0.5	0	0
PeqCOL03	0.3204	0	0	0	0.0838	0.024	0	0.5719	0	0
PeqCOL04	0.2983	0	0	0	0.1218	0.0504	0	0.5294	0	0
PeqCOL05	0.2168	0	0	0	0.0979	0.028	0	0.6573	0	0
PeqCOL06	0.2598	0	0	0	0.1288	0.0306	0	0.5808	0	0
PeqCOL07	0.2609	0	0	0	0.1014	0.0314	0	0.6063	0	0
Mean	0.310674	0	0	0	0.106501	0.0313559	0	0.551479	0	0

## Sheet: Table S7
Table S7. Primer sequences of the candidate genes used for qRT-PCR analyses.
Gene	TF	forward primer (5'to3')		reverse primer (5'to3')
Mol013855	CsiCOL05	COL05-F	CGGTGATGATGGATCGTGAG	COL05-R	GCGTAGCGTATCGTCTTCTC
Mol021474	CsiCOL09	COL09-F	CGAGCACAAGCGGTTCTAAG	COL09-R	GGTTAGGTGTTACGGAGACGAT
Mol006877	CsiFT	CsiFT-F	GCGAGTGATTGGTGATGT	CsiFTL-R	AAGACGAAGCGGTGTATG
Mol012752	CsiTFL1	CsiTFL1-F	CGTGAAGATGAAGGTGACT	CsiTFL1-R	CTCGGACTCTCGTAAGGA
Mol000781	CsiAP1	CsiAP1-F	GGAGGGTTCAGTTGAAGCGA	CsiAP1-R	CTCCATACTGGCTTCGGTGG
Mol005864	CsiSOC1	CsiSOC1-F	GAGTTCGCTAGTTCCAGCAT	CsiSOC1-R	GCAAATGGTTCTTTCGTCCC
Mol010933	CsiLFY	CsiLFY-F	ATAACGCTCTTGACGCACTT	CsiLFY-R	AGGAGCCGTCCTTGTTTTTC
Mol018861	CsiAG1	CsiSEP4-F	GTCCTCTGCGATGCTGAAGTC	CsiAG1-R	ATAGTTGCCTTCACACTGTTATTGG

## Sheet: Table S8
Table S8. Regulation of CO genes in Arabidopsis
Gene name	Gene	Locus
TEOSINTEBRANCHED/CYCLOIDEA/PCF(TCP)	AtTCP1	AT1G67260
	AtTCP2	AT4G18390
	AtTCP3	AT1G53230
	AtTCP4	AT3G15030
	AtTCP10	AT2G31070
	AtTCP24	AT1G30210
PHYTOCHROME ANDFLOWERINGTIME1 (PFT1)	PFT1	AT1G25540
GIGANTEA (GI)	GI	AT1G22770
JUMANJI 28 (JMJ28)	JMJ28	AT4G21430
FLOWERING BHLH (FBH)	FBH1	AT1G35460
	FBH2	AT4G09180
	FBH3	AT1G51140
	FBH4	AT2G42280
CYCLING DOF FACTOR (CDF)	CDF1	AT5G62430
	CDF2	AT5G39660
	CDF3	AT3G47500
	CDF4	AT2G34140
	CDF5	AT1G69570
	CDF6	AT1G26790
TARGET OF AT (TOE)	TOE1	AT2G28550
	TOE2	AT5G60120
	TOE3	AT5G67180
CRYPTOCHROME (CRY)	CRY1	AT4G08920
	CRY2	AT1G04400
PHYTOCHROME-DEPENDENT LATE-FLOWERING (PHL)	PHL	AT1G72390
FLAVIN-BINDING, KELCH REPEAT, F-BOX 1 (FKF1)	FKF1	AT1G68050
PHYTOCHROME A (PHYA)	PHYA	AT1G09570
PHYTOCHROME B (PHYB)	PHYB	AT2G18790
HIGH EXPRESSION OF OSMOTICALLY RESPONSIVE GENE 1 (HOS1)	HOS1	AT2G39810
TIMING OF CAB EXPRESSION 1 (TOC1)	TOC1	AT5G61380
PSEUDO-RESPONSE REGULATOR (PRR)	PRR5	AT5G24470
	PRR7	AT5G02810
	PRR9	AT2G46790
CONSTITUTIVE PHOTOMORPHOGENIC 1 (COP1)	COP1	AT2G32950
SUPPRESSOR OF PHYTOCHROME A (SPA)	SPA1	AT2G46340
	SPA3	AT3G15354
	SPA4	AT1G53090
SHAGGY-like kinase 12 (SK12)	SK12	AT3G05840
FK506-binding protein (FKBP12)	FKBP12	AT5G64350
EARLY FLOWERING 3 (ELF3)	ELF3	AT2G25930
